# Supplementary material for: Autocatalytic and DMSO-promoted regioselective synthesis of pyrimidine-fused quinolines from anilines and barbituric acids
Source: Royal Society of Chemistry journal article supplement (doi:10.1039/d4cc04044a), 2024-01-01
Supplement: d4cc04044a1.pdf [file d4cc04044a1.pdf]

# Autocatalytic and DMSO-Promoted Regioselective Synthesis of Pyrimidine-Fused Quinolines from Anilines and Barbituric Acids

Pushpendra Yadav,<sup>a,b</sup> Deblina Chatterjee,<sup>a</sup> Suman Bhowmick,<sup>a,b</sup> Khushboo Tiwari,<sup>a,b</sup> Annapurna Awasthi,<sup>a,b</sup> and Dharmendra Kumar Tiwari<sup>\*†</sup>

<sup>a</sup> Department of Biological and Synthetic Chemistry, Center of Biomedical Research (CBMR), SGPGIMS Campus, Raibareli Road, Lucknow, U.P. 226014, INDIA. Email: dkt80.org@gmail.com & dktiwari@cbmr.res.in

<sup>b</sup> Department of Chemistry, Institute of Science, Banaras Hindu University, 221005, U.P. INDIA.

<sup>c</sup> Academy of Scientific & Innovative Research (AcSIR), CSIR- Human Resource Development Centre, (CSIR-HRDC) Campus Ghaziabad, Uttar Pradesh- 201 002.

## Table of Contents

|   |                                                                        |       |
|---|------------------------------------------------------------------------|-------|
| 1 | General Information                                                    | 1-2   |
| 2 | Experimental Procedure for the Synthesis of                            | 2     |
| 3 | Spectral data of all compounds ( <b>3ab-3as</b> & <b>3ba-3ca</b> )     | 2-9   |
| 4 | Experimental Procedure for Gram-Level Synthesis of <b>3aa</b>          | 9     |
| 5 | Experimental details of controlled experiments                         | 9-12  |
| 6 | Experimental Procedure for deuterium labelling experiment              | 11    |
| 7 | Soft copies of <sup>1</sup> H and <sup>13</sup> C NMR of all compounds | 12-41 |
| 8 | Single Crystal of <b>3aa</b>                                           | 41-45 |

## EXPERIMENTAL SECTION

### General Information

All reagents were purchased from Sigma Aldrich, Thermo-Fischer, TCI, and local vendors and were used without further purification. All experiments were carried out in ace pressure tubes. All the solvents used for the reaction were distilled before use. The product purification by column chromatography was accomplished using silica gel 100-200 mesh. Analytical TLC was performed with Merck silica gel 60 F254 plates, and the products were visualized by UV detection. <sup>1</sup>H, <sup>13</sup>C NMR spectra were recorded on Avance III, and Bruker at 400 MHz, 101 MHz, and 376 MHz spectrometers respectively using CDCl<sub>3</sub>. In the experimental section, the <sup>1</sup>H NMR chemical shifts are expressed in the form of ppm (δ) relative to δ = 7.26 for CDCl<sub>3</sub> whereas <sup>13</sup>C{<sup>1</sup>H} NMR chemical shift are expressed relative to δ = 77.00. Multiplicities in the

<sup>1</sup>H NMR spectra are described as a s = singlet, d = doublet, t = triplet, q = quartet, m = multiplet, bs = broad singlet; coupling constants are reported in Hz. HRMS and Electron Spray Ionization (ESI) (m/z) spectra were recorded on Agilent Technologies 6530 Accurate-Mass Q-TOF LC/MS.

**General Procedure (GP1) for the Synthesis of 1,3-dimethylpyrimido[4,5-b]quinoline-2,4(1H,3H)-dione (3aa):**

A solution of aniline (**1a**, 1.0 mmol, 0.091 mL), 1,3-dimethyl barbituric acid (**2a**, 1.2 mmol; 0.19 g), and DMSO (3.0 mL) was placed in an Ace pressure tube and heated in a preheated oil bath at 120 °C. The mixture was stirred for 12 hours. After completion of the reaction, the mixture was allowed to cool to room temperature and was then diluted with ethyl acetate (10 mL). The organic layer was washed successively with water (10 mL), sodium bicarbonate solution (10 mL), and brine (10 mL). The organic layer was dried over anhydrous sodium sulfate, and the solvent was evaporated under reduced pressure to obtain the crude product. The crude product was purified by column chromatography using a 20% ethyl acetate/hexane mixture on 100-200 mesh silica gel to afford the product **3aa** as a white solid (0.17 g, 70% yield); **Mp** 204 – 206 °C.; <sup>1</sup>H NMR (400 MHz, CDCl<sub>3</sub>) δ 9.01 (s, 1H), 7.97 – 7.94 (m, 2H), 7.83 (dd, *J* = 8.4, 7.1 Hz, 1H), 7.52 (t, *J* = 7.5 Hz, 1H), 3.83 (s, 3H), 3.53 (s, 3H); <sup>13</sup>C NMR (101 MHz, CDCl<sub>3</sub>) δ 161.57, 151.78, 150.00, 148.55, 140.21, 133.31, 129.39, 128.25, 125.95, 124.83, 110.99, 29.79, 28.68; HRMS (ESI) m/z calcd for C<sub>13</sub>H<sub>12</sub>N<sub>3</sub>O<sub>2</sub> [M+H] is 242.0885, found 242.0920.

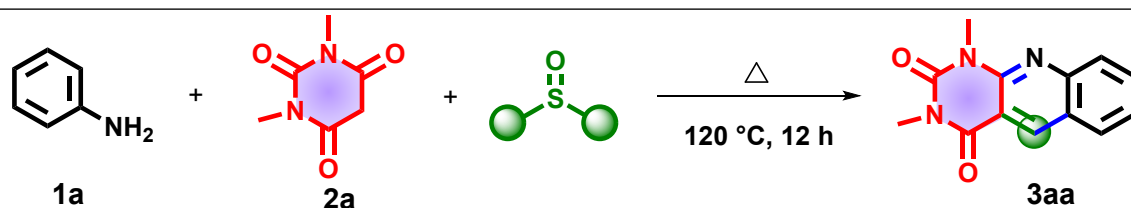

**1,3,7-trimethylpyrimido[4,5-b]quinoline-2,4(1H,3H)-dione (3ba):**

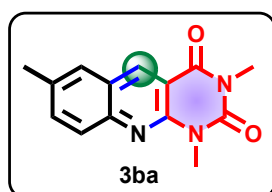

The general procedure (GP1) was followed on a 1.0 mmol scale (**2b**) to afford the compound **3ba** as a white solid (0.18 g, 71% yield); *R<sub>f</sub>* = 0.3 (PE : EA = 80:20); **Mp**: 182 – 184 °C; <sup>1</sup>H NMR (400 MHz, CDCl<sub>3</sub>) δ 8.83 (s, 1H), 7.84 (d, *J* = 8.5 Hz, 1H), 7.66 – 7.59 (m, 2H), 3.77 (s, 3H), 3.49 (s, 3H), 2.52 (s, 3H). <sup>13</sup>C NMR (101 MHz, CDCl<sub>3</sub>) δ 161.56, 151.66, 148.44, 147.90, 139.21, 135.82, 135.61, 127.90, 127.83, 124.75, 110.76, 29.65, 28.59, 21.52; HRMS (ESI) m/z calcd for C<sub>14</sub>H<sub>14</sub>N<sub>3</sub>O<sub>2</sub> [M+H]<sup>+</sup> is 256.1081, found 256.1076.

---

**1,3,9-trimethylpyrimido[4,5-b]quinoline-2,4(1H,3H)-dione (3ca):**

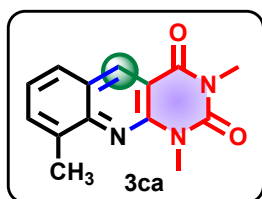

The general procedure (GPI) was followed on a 1.0 mmol scale (**2c**) to afford the compound **3ca** as a white solid (0.19 g, 73% yield);  $R_f = 0.3$  (PE : EA = 90:10); **Mp**: 203 - 205 °C;  $^1\text{H NMR}$  (400 MHz,  $\text{CDCl}_3$ )  $\delta$  8.83 (s, 1H), 7.84 (d,  $J = 8.5$  Hz, 1H), 7.66 – 7.59 (m, 2H), 3.77 (s, 3H), 3.49 (s, 3H), 2.52 (s, 3H);  $^{13}\text{C NMR}$  (101 MHz,  $\text{CDCl}_3$ )  $\delta$  161.40, 151.51, 148.28, 147.74, 139.06, 135.67, 135.45, 127.74, 127.67, 124.59, 110.61, 29.49, 28.43, 21.37; **HRMS** (ESI)  $m/z$  calcd for  $\text{C}_{14}\text{H}_{14}\text{N}_3\text{O}_2$   $[\text{M}+\text{H}]^+$  is 256.1081, found 256.1075.

---

**1,3,8,9-tetramethylpyrimido[4,5-b]quinoline-2,4(1H,3H)-dione (3da):**

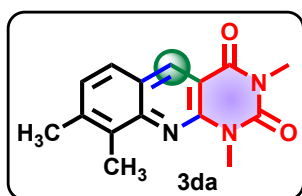

The general procedure (GPI) was followed on a 1.0 mmol scale (**2d**) to afford the compound **3da** as a white solid (0.2 g, 75% yield);  $R_f = 0.3$  (PE : EA = 80:20); **Mp**: 220 – 222 °C;  $^1\text{H NMR}$  (400 MHz,  $\text{CDCl}_3$ )  $\delta$  8.83 (s, 1H), 7.64 (d,  $J = 8.3$  Hz, 1H), 7.31 (d,  $J = 8.3$  Hz, 1H), 3.79 (s, 3H), 3.50 (s, 3H), 2.65 (s, 3H), 2.51 (s, 3H);  $^{13}\text{C NMR}$  (101 MHz,  $\text{CDCl}_3$ )  $\delta$  161.54, 151.69, 148.50, 147.24, 141.66, 139.81, 133.40, 128.72, 126.00, 122.93, 109.35, 29.43, 28.41, 21.11, 13.28; **HRMS** (ESI)  $m/z$  calcd for  $\text{C}_{15}\text{H}_{16}\text{N}_3\text{O}_2$   $[\text{M}+\text{H}]^+$  is 270.1237, found 270.1252.

---

**1,3,7,9-tetramethylpyrimido[4,5-b]quinoline-2,4(1H,3H)-dione (3ea):**

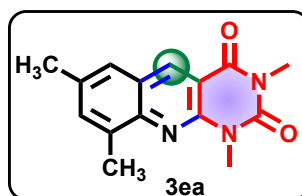

The general procedure (GPI) was followed on a 1.0 mmol scale (**2e**) to afford the compound **3ea** as a white solid (0.2 g, 74% yield);  $R_f = 0.3$  (PE : EA = 80:20); **Mp**: 220 – 222 °C;  $^1\text{H NMR}$  (400 MHz,  $\text{CDCl}_3$ )  $\delta$  8.60 (s, 1H), 7.40 (s, 1H), 7.35 (s, 1H), 3.65 (s, 3H), 3.43 (s, 3H), 2.58 (s, 3H), 2.43 (s, 3H);  $^{13}\text{C NMR}$  (101 MHz,  $\text{CDCl}_3$ )  $\delta$  161.24, 151.35, 146.93, 146.40, 138.75, 135.55, 135.18, 125.34, 124.31, 109.90, 29.18, 28.29, 21.32, 17.55; **HRMS** (ESI)  $m/z$  calcd for  $\text{C}_{15}\text{H}_{16}\text{N}_3\text{O}_2$   $[\text{M}+\text{H}]^+$  is 270.1237, found 270.1251.

---

**9-ethyl-1,3-dimethylpyrimido[4,5-b]quinoline-2,4(1H,3H)-dione (3fa):**

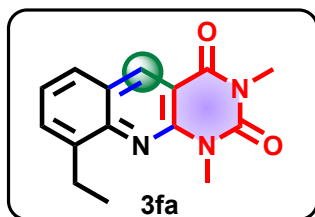

The general procedure (**GP1**) was followed on a 1.0 mmol scale (**2f**) to afford the compound **3fa** as a white solid (0.19 g, 73% yield);  $R_f = 0.3$  (PE : EA = 90:10); **Mp**: 175 – 177 °C;  $^1\text{H NMR}$  (400 MHz,  $\text{CDCl}_3$ )  $\delta$  8.97 (s, 1H), 7.78 (d,  $J = 7.5$  Hz, 1H), 7.67 (d,  $J = 6.9$  Hz, 1H), 7.49 – 7.41 (m, 1H), 3.83 (s, 3H), 3.53 (s, 3H), 3.23 (q,  $J = 7.5$  Hz, 2H), 1.38 (t,  $J = 7.5$  Hz, 3H);  $^{13}\text{C NMR}$  (101 MHz,  $\text{CDCl}_3$ )  $\delta$  161.55, 151.71, 148.19, 147.34, 141.91, 140.23, 131.57, 127.05, 125.69, 124.71, 110.39, 29.50, 28.49, 24.79, 14.52; **HRMS** (ESI)  $m/z$  calcd for  $\text{C}_{15}\text{H}_{16}\text{N}_3\text{O}_2$   $[\text{M}+\text{H}]^+$  is 270.1237, found 270.1216.

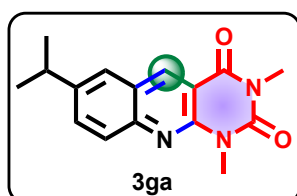

**7-isopropyl-1,3-dimethylpyrimido[4,5-b]quinoline-2,4(1H,3H)-dione (3ga):**

The general procedure (**GP1**) was followed on a 1.0 mmol scale (**2g**) to afford the compound **3ga** as a white solid (0.22 g, 76% yield);  $R_f = 0.3$  (PE : EA = 90:10); **Mp**: 164 – 166 °C;  $^1\text{H NMR}$  (400 MHz,  $\text{CDCl}_3$ )  $\delta$  8.85 (s, 1H), 7.85 (d,  $J = 8.7$  Hz, 1H), 7.71 – 7.64 (m, 2H), 3.74 (s, 3H), 3.46 (s, 3H), 3.12 – 3.01 (m, 1H), 1.33 (d,  $J = 6.9$  Hz, 6H);  $^{13}\text{C NMR}$  (101 MHz,  $\text{CDCl}_3$ ):  $\delta$  161.29, 151.43, 148.55, 147.75, 146.29, 139.29, 133.14, 127.79, 124.98, 124.55, 110.49, 33.77, 29.42, 28.35, 23.63; **HRMS** (ESI)  $m/z$  calcd for  $\text{C}_{16}\text{H}_{18}\text{N}_3\text{O}_2$   $[\text{M}+\text{H}]^+$  is 284.1394, found 284.1409.

**7-butyl-1,3-dimethylpyrimido[4,5-b]quinoline-2,4(1H,3H)-dione (3ha):**

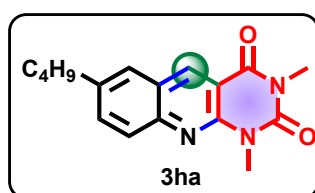

The general procedure (**GP1**) was followed on a 1.0 mmol scale (**2h**) to afford the compound **3ha** as a white solid (0.23 g, 76% yield);  $R_f = 0.3$  (PE : EA = 90:10); **Mp**: 181 – 183 °C;  $^1\text{H NMR}$  (400 MHz,  $\text{CDCl}_3$ )  $\delta$  8.80 (s, 1H), 7.82 (d,  $J = 8.4$  Hz, 1H), 7.64 – 7.58 (m, 2H), 3.73 (s, 3H), 3.45 (s, 3H), 2.75 (t,  $J = 7.7$  Hz, 2H), 1.72 – 1.62 (m, 2H), 1.43 – 1.33 (m, 2H), 0.94 (t,  $J = 7.3$  Hz, 3H);  $^{13}\text{C NMR}$  (101 MHz,  $\text{CDCl}_3$ )  $\delta$  161.27, 151.40, 148.37, 147.66, 140.49, 139.08, 134.70, 127.65, 127.06, 124.51, 110.46, 35.26, 33.11, 29.41, 28.35, 22.27, 13.87; **HRMS** (ESI)  $m/z$  calcd for  $\text{C}_{17}\text{H}_{20}\text{N}_3\text{O}_2$   $[\text{M}+\text{H}]^+$  is 298.1550, found 298.1546.

**1,3-dimethyl-7-pentylpyrimido[4,5-b]quinoline-2,4(1H,3H)-dione (3ia):**

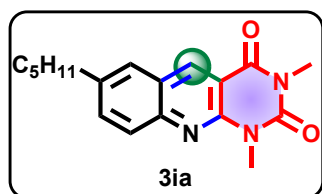

The general procedure (GP1) was followed on a 1.0 mmol scale (2i) to afford the compound 3ia as a white solid (0.24 g, 78% yield);  $R_f = 0.3$  (PE : EA = 90:10); **Mp:** 148 – 150 °C;  **$^1\text{H NMR}$  (400 MHz,  $\text{CDCl}_3$ )**  $\delta$  8.80 (s, 1H), 7.82 (d,  $J = 8.4$  Hz, 1H), 7.61 (d,  $J = 8.6$  Hz, 2H), 3.73 (s, 3H), 3.45 (s, 3H), 2.74 (t,  $J = 7.6$  Hz, 2H), 1.73 – 1.62 (m, 2H), 1.35 - 1.32 (m, 4H), 0.89 (t,  $J = 6.7$  Hz, 3H);  **$^{13}\text{C NMR}$  (101 MHz,  $\text{CDCl}_3$ )**  $\delta$  161.27, 151.41, 148.38, 147.66, 140.53, 139.09, 134.70, 127.65, 127.06, 124.51, 110.46, 77.32, 77.00, 76.68, 35.53, 31.37, 30.67, 29.41, 28.35, 22.44, 13.96; **HRMS** (ESI)  $m/z$  calcd for  $\text{C}_{18}\text{H}_{22}\text{N}_3\text{O}_2$   $[\text{M}+\text{H}]^+$  is 312.1707, found 312.1700.

---

**7-methoxy-1,3-dimethylpyrimido[4,5-b]quinoline-2,4(1H,3H)-dione (3ja):**

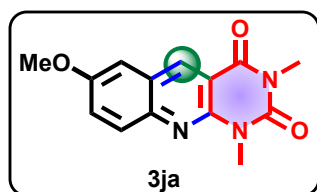

The general procedure (GP1) was followed on a 1.0 mmol scale (2g) to afford the compound 3ja as a yellow solid (0.22 g, 80% yield);  $R_f = 0.3$  (PE : EA = 90:10); **Mp:** 258 – 260 °C;  **$^1\text{H NMR}$  (400 MHz,  $\text{CDCl}_3$ )**  $\delta$  8.86 (s, 1H), 7.88 (d,  $J = 9.2$  Hz, 1H), 7.47 (dd,  $J = 9.2, 2.3$  Hz, 1H), 7.15 (d,  $J = 2.1$  Hz, 1H), 3.94 (s, 3H), 3.80 (s, 3H), 3.51 (s, 3H);  **$^{13}\text{C NMR}$  (101 MHz,  $\text{CDCl}_3$ )**  $\delta$  161.52, 157.13, 151.55, 146.87, 145.98, 138.18, 129.43, 126.34, 125.50, 110.81, 105.76, 55.64, 29.51, 28.49; **HRMS** (ESI)  $m/z$  calcd for  $\text{C}_{14}\text{H}_{14}\text{N}_3\text{O}_3$   $[\text{M}+\text{H}]^+$  is 272.1030, found 270.1025.

---

**9-methoxy-1,3-dimethylpyrimido[4,5-b]quinoline-2,4(1H,3H)-dione (3ka):**

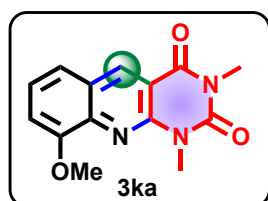

The general procedure (GP1) was followed on a 1.0 mmol scale (2k) to afford the compound 3ka as a white solid (0.21 g, 79% yield);  $R_f = 0.3$  (PE : EA = 80:20); **Mp:** 245 – 247 °C;  **$^1\text{H NMR}$  (400 MHz,  $\text{CDCl}_3$ )**  $\delta$  8.98 (s, 1H), 7.53 (d,  $J = 8.1$  Hz, 1H), 7.45 (d,  $J = 7.9$  Hz, 1H), 7.18 (d,  $J = 7.6$  Hz, 1H), 4.09 (s, 3H), 3.88 (s, 3H), 3.52 (s, 3H);  **$^{13}\text{C NMR}$  (101 MHz,  $\text{CDCl}_3$ )**  $\delta$  161.35, 154.37, 151.60, 147.69, 141.52, 140.05, 125.85, 125.74, 120.92, 111.38, 111.10, 56.32, 29.71, 28.53; **HRMS** (ESI)  $m/z$  calcd for  $\text{C}_{14}\text{H}_{14}\text{N}_3\text{O}_3$   $[\text{M}+\text{H}]^+$  is 272.1030, found 272.1041.

---

**6,7,8-trimethoxy-1,3-dimethylpyrimido[4,5-b]quinoline-2,4(1H,3H)-dione (3la):**

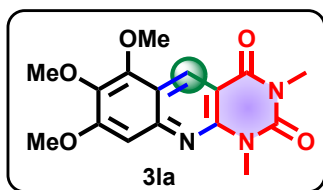

The general procedure (GPI) was followed on a 1.0 mmol scale (2l) to afford the compound 3la as a white solid (0.28 g, 84% yield);

$R_f = 0.3$  (PE : EA = 70:30); **Mp**: 210 – 212 °C;  **$^1\text{H NMR}$  (400 MHz,  $\text{CDCl}_3$ )**  $\delta$  9.07 (s, 1H), 7.03 (s, 1H), 4.12 (s, 3H), 4.04 (s, 3H), 3.97 (s, 3H), 3.75 (s, 3H);  **$^{13}\text{C NMR}$  (101 MHz,  $\text{CDCl}_3$ )**  $\delta$  161.36, 159.48, 151.57, 148.45, 148.05, 147.92, 139.48, 134.37, 115.97, 108.05, 102.37, 61.65, 61.26, 56.24, 29.38, 28.30; **HRMS** (ESI)  $m/z$  calcd for  $\text{C}_{16}\text{H}_{18}\text{N}_3\text{O}_5$   $[\text{M}+\text{H}]^+$  is 332.1241, found 332.1237.

---

**7,8-dimethoxy-1,3-dimethylpyrimido[4,5-b]quinoline-2,4(1H,3H)-dione (3ma):**

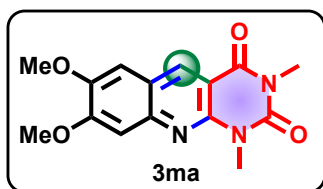

The general procedure (GPI) was followed on a 1.0 mmol scale (2m) to afford the compound 3ma as a brown solid (0.25 g, 83% yield);  $R_f = 0.3$  (PE : EA = 60:40); **Mp**: 270 – 275 °C;  **$^1\text{H NMR}$  (400 MHz,  $\text{CDCl}_3$ )**  $\delta$  8.69 (s, 1H), 7.24 (s, 1H), 7.06 (s, 1H), 4.06

(s, 3H), 3.99 (s, 3H), 3.75 (s, 3H), 3.45 (s, 3H);  **$^{13}\text{C NMR}$  (101MHz,  $\text{CDCl}_3$ )**  $\delta$  161.50, 155.61, 151.54, 149.24, 147.57, 147.42, 137.02, 120.07, 108.49, 106.56, 105.80, 56.36, 56.11, 29.40, 28.32; **HRMS** (ESI)  $m/z$  calcd for  $\text{C}_{15}\text{H}_{16}\text{N}_3\text{O}_4$   $[\text{M}+\text{H}]^+$  is 302.1135, found 302.1117.

---

**6,8-dimethyl-[1,3]dioxolo[4,5-g]pyrimido[4,5-b]quinoline-7,9(6H,8H)-dione (3na):**

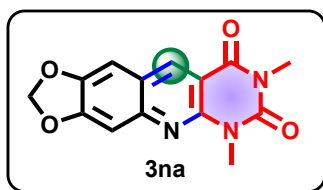

The general procedure (GPI) was followed on a 1.0 mmol scale (2n) to afford the compound 3na as a sticky solid (0.23 g, 85% yield);  $R_f = 0.3$  (PE : EA = 80:20);  **$^1\text{H NMR}$  (400 MHz,  $\text{CDCl}_3$ )**  $\delta$  8.87 (s, 1H), 7.39 (d,  $J = 2.4$  Hz, 2H), 6.28 (s, 2H), 3.91 (s, 3H),

3.64 (s, 3H);  **$^{13}\text{C NMR}$  (101 MHz,  $\text{CDCl}_3$ )**  $\delta$  161.61, 153.92, 149.15, 147.54, 147.50, 137.53, 121.45, 108.62, 104.73, 103.55, 102.25, 29.45, 28.44; **HRMS** (ESI)  $m/z$  calcd for  $\text{C}_{14}\text{H}_{12}\text{N}_3\text{O}_4$   $[\text{M}+\text{H}]^+$  is 286.0822, found 286.0820.

---

**1,3-dimethyl-7-phoxypyrimido[4,5-b]quinoline-2,4(1H,3H)-dione (3oa):**

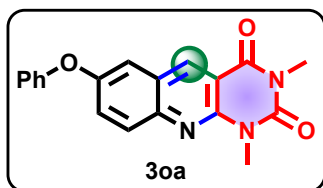

The general procedure (**GPI**) was followed on a 1.0 mmol scale (**2o**) to afford the compound **30a** as a white solid (0.28 g, 84% yield);  $R_f = 0.3$  (PE : EA = 60:40); **Mp**: 197 – 199 °C;  $^1\text{H NMR}$  (400 MHz,  $\text{CDCl}_3$ )  $\delta$  8.84 (s, 1H), 7.98 (d,  $J = 9.2$  Hz, 1H), 7.61 (dd,  $J = 9.2, 2.7$  Hz, 1H), 7.42 (t,  $J = 7.9$  Hz, 2H), 7.31 (d,  $J = 2.6$  Hz, 1H), 7.21 (t,  $J = 7.4$  Hz, 1H), 7.11 (d,  $J = 7.7$  Hz, 2H), 3.82 (s, 3H), 3.52 (s, 3H);  $^{13}\text{C NMR}$  (101 MHz,  $\text{CDCl}_3$ )  $\delta$  161.31, 156.11, 155.17, 151.54, 147.55, 146.59, 138.83, 130.09, 129.91, 126.91, 125.32, 124.36, 119.63, 113.55, 111.13, 29.59, 28.53; **HRMS** (ESI)  $m/z$  calcd for  $\text{C}_{19}\text{H}_{16}\text{N}_3\text{O}_3$   $[\text{M}+\text{H}]^+$  is 334.1186, found 334.1174.

### 8-fluoro-1,3-dimethylpyrimido[4,5-b]quinoline-2,4(1H,3H)-dione (**3pa**):

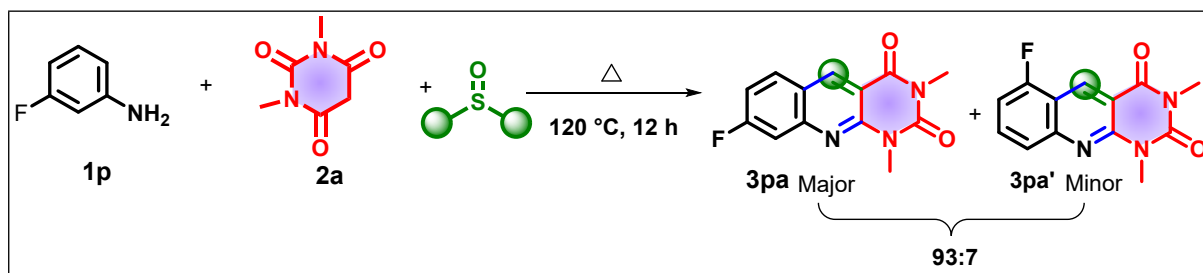

The general procedure (**GPI**) was followed on a 2.0 mmol scale (**2p**) to afford an inseparable mixture of **3pa** and **3pa'** in a 93:7 ratio confirmed by  $^1\text{H NMR}$ .

The compound was purified by column chromatography using a 20% of ethylacetate: hexane solvent system furnished a mixture of **3pa** and **3pa'** as a white solid in a 93:7 ratio. The  $^1\text{H}$ ,  $^{13}\text{C}$ , and melting point (**Mp**) of the mixture of **3pa** and **3pa'** were recorded. In the  $^1\text{H}$ , and  $^{13}\text{C}$ ,  $\text{NMR}$  spectra, the peaks corresponding to the major product, **3pa**, were assigned.

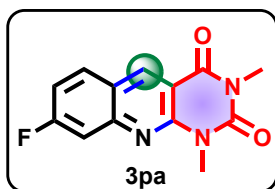

White solid (0.18 g, 68% yield);  $R_f = 0.3$  (PE : EA = 80:20); **Mp**: 218 – 220 °C;  $^1\text{H NMR}$  (400 MHz,  $\text{CDCl}_3$ )  $\delta$  8.95 (s, 1H), 7.92 (dd,  $J = 8.9, 6.2$  Hz, 1H), 7.59 (dd,  $J = 10.1, 2.0$  Hz, 1H), 7.29 (td,  $J = 8.8, 2.4$  Hz, 1H), 3.79 (s, 3H), 3.51 (s, 3H);  $^{13}\text{C NMR}$  (101 MHz,  $\text{CDCl}_3$ )  $\delta$  166.78 and 164.24 (d,  $J_{\text{C-F}} = 255.4$  Hz), 161.17, 151.47, 151.33 and 151.18 (d,  $J_{\text{C-F}} = 14.1$  Hz), 149.18, 139.78, 131.58, 131.48, 121.68, 116.70 and 116.44 (d,  $J_{\text{C-F}} = 25.7$  Hz), 112.14 and 111.93 (d,  $J_{\text{C-F}} = 21.0$  Hz), 29.64, 28.51;  $^{19}\text{F NMR}$  (375 MHz,  $\text{CDCl}_3$ ):  $\delta$  -102.96; **HRMS** (ESI)  $m/z$  calcd for  $\text{C}_{13}\text{H}_{11}\text{FN}_3\text{O}_2$   $[\text{M}+\text{H}]^+$  is 260.0830, found 260.0844.

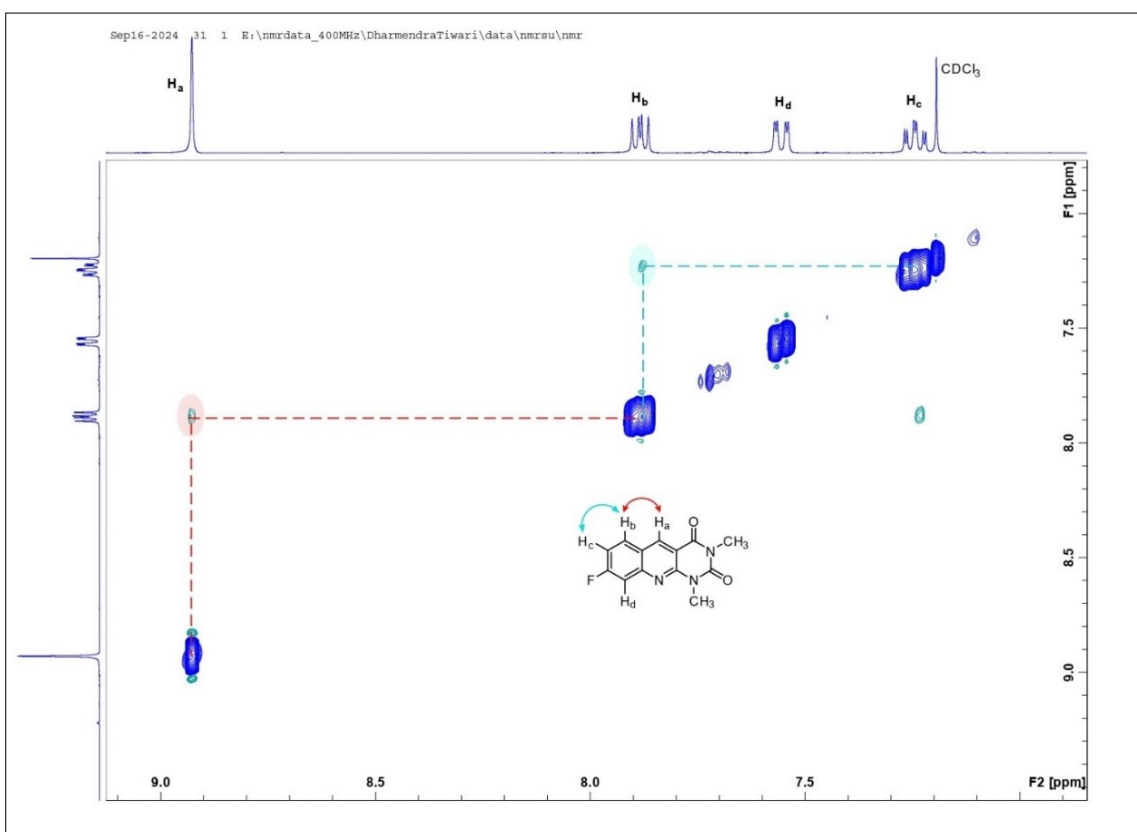

2D-NOESY spectra of **3pa**

**2D-NOESY spectra of 3pa:** Assigned interactions (red dotted lines) shown below easily indicate that  $H_a$  and  $H_b$  are close enough in major regioisomer, whereas in minor isomer fluorine atom easily substitutes  $H_b$ . Green-colored (dotted line) interaction proved that  $H_b$  and  $H_c$  are in ortho positions.

**7-fluoro-1,3-dimethylpyrimido[4,5-b]quinoline-2,4(1H,3H)-dione (3qa):**

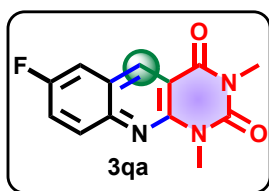

The general procedure (**GPI**) was followed on a 1.0 mmol scale (**2q**) to afford the compound **3qa** as a white solid (0.18 g, 69% yield);  $R_f = 0.3$  (PE : EA = 90:10); **Mp:** 238 – 240 °C;  **$^1H$  NMR (400 MHz,  $CDCl_3$ )**  $\delta$  8.93 (s, 1H), 7.98 (dd,  $J = 8.9, 5.0$  Hz, 1H), 7.63 – 7.51 (m, 2H), 3.80 (s, 3H), 3.52 (s, 3H);  **$^{13}C$  NMR (101 MHz,  $CDCl_3$ )**  $\delta$  161.10, 160.87 and 151.43 (d,  $J_{(C-F)} = 248.6$  Hz), , 147.95, 146.84, 139.24 and 139.19 (d,  $J_{(C-F)} = 5.7$  Hz), 130.51 and 130.43 (d,  $J_{(C-F)} = 8.9$  Hz), 124.98 and 124.88 (d,  $J_{(C-F)} = 10.1$  Hz), 123.55 and 123.29 (d,  $J_{(C-F)} = 26$  Hz), 112.00 and 111.78 (d,  $J_{(C-F)} = 21.8$  Hz), 111.45, 29.61, 28.57;  **$^{19}F$  NMR (375 MHz,  $CDCl_3$ ):**  $\delta$  -113.76; **HRMS (ESI)  $m/z$  calcd for  $C_{13}H_{11}FN_3O_2$   $[M+H]^+$  is 260.0830, found 260.0838.**



### 9-fluoro-1,3-dimethylpyrimido[4,5-b]quinoline-2,4(1H,3H)-dione (3ra):

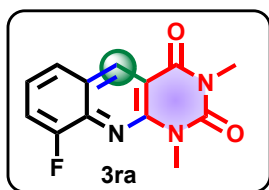

The general procedure (GPI) was followed on a 1.0 mmol scale (**2r**) to afford the compound **3ra** as a sticky solid (0.26 g, 70% yield);  $R_f = 0.3$  (PE : EA = 90:21);  $^1\text{H NMR}$  (400 MHz,  $\text{CDCl}_3$ )  $\delta$  9.03 (d,  $J = 1.1$  Hz, 1H), 7.74 (d,  $J = 8.1$  Hz, 1H), 7.55 – 7.50 (m, 1H), 7.48 – 7.43 (m, 1H), 3.85 (s, 3H), 3.53 (s, 3H);  $^{13}\text{C NMR}$  (101 MHz,  $\text{CDCl}_3$ )  $\delta$  161.07, 158.35 and 155.79 (d,  $J_{\text{C-F}} = 257.2$  Hz), 151.44, 148.54, 139.96 and 139.93 (d,  $J_{\text{C-F}} = 2.9$  Hz), 139.90 and 139.79 (d,  $J_{\text{C-F}} = 11.6$  Hz), 126.24 and 126.22 (d,  $J_{\text{C-F}} = 2.2$  Hz), 125.40 and 125.32 (d,  $J_{\text{C-F}} = 7.5$  Hz), 124.84 and 124.79 (d,  $J_{\text{C-F}} = 4.8$  Hz), 117.19 and 117.00 (d,  $J_{\text{C-F}} = 18.7$  Hz), 111.72, 29.78, 28.60;  $^{19}\text{F NMR}$  (375 MHz,  $\text{CDCl}_3$ ):  $\delta$  -124.84; HRMS (ESI)  $m/z$  calcd for  $\text{C}_{13}\text{H}_{11}\text{FN}_3\text{O}_2$   $[\text{M}+\text{H}]^+$  is 260.0830, found 260.0848.

---

### 1,3-dimethyl-7-(trifluoromethyl)pyrimido[4,5-b]quinoline-2,4(1H,3H)-dione (3sa):

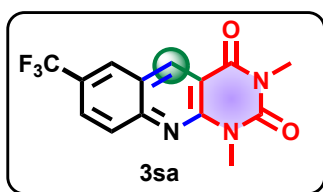

The general procedure (GPI) was followed on a 1.0 mmol scale (**2s**) to afford the compound **3sa** as a white solid (0.2 g, 67% yield);  $R_f = 0.3$  (PE : EA = 70:30); **Mp**: 186 – 188 °C;  $^1\text{H NMR}$  (400 MHz,  $\text{CDCl}_3$ )  $\delta$  9.08 (s, 1H), 8.24 (s, 1H), 8.09 (d,  $J = 8.9$  Hz, 1H), 7.96 (dd,  $J = 8.9, 1.7$  Hz, 1H), 3.83 (s, 3H), 3.53 (s, 3H);  $^{13}\text{C NMR}$  (101 MHz,  $\text{CDCl}_3$ )  $\delta$  160.80, 151.37, 150.85, 149.90, 140.86, 129.28, 128.58 (q,  $J_{\text{C-F}} = 2.9$  Hz), 127.08 ( $J_{\text{C-F}} = 4.3$  Hz), 123.44 (t,  $J_{\text{C-F}} = 272.2$  Hz), , 111.95, 77.00, 29.79, 28.63.  $^{19}\text{F NMR}$  (375 MHz,  $\text{CDCl}_3$ ):  $\delta$  -62.43; HRMS (ESI)  $m/z$  calcd for  $\text{C}_{14}\text{H}_{11}\text{F}_3\text{N}_3\text{O}_2$   $[\text{M}+\text{H}]^+$  is 310.0798, found 310.0810.

---

### 7-chloro-1,3-dimethylpyrimido[4,5-b]quinoline-2,4(1H,3H)-dione (3ta):

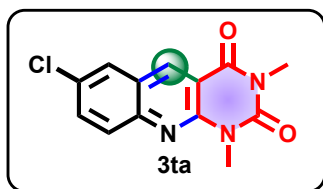

The general procedure (GPI) was followed on a 1.0 mmol scale (**2t**) to afford the compound **3ta** as a sticky solid (0.2 g, 71% yield);  $R_f = 0.3$  (PE : EA = 90:10);  $^1\text{H NMR}$  (400 MHz,  $\text{CDCl}_3$ )  $\delta$  8.91 (s, 1H), 7.93 (d,  $J = 9.0$  Hz, 2H), 7.74 (d,  $J = 8.1$  Hz, 1H), 3.81 (s, 3H), 3.53 (s, 3H);  $^{13}\text{C NMR}$  (101 MHz,  $\text{CDCl}_3$ )  $\delta$  161.07, 151.44, 148.59, 148.21, 139.05, 133.93, 131.41, 129.68, 127.55, 125.13, 111.57, 29.69, 28.61; HRMS (ESI)  $m/z$  calcd for  $\text{C}_{13}\text{H}_{11}\text{ClN}_3\text{O}_2$   $[\text{M}+\text{H}]^+$  is 276.0534, found 276.0533.

---

### 9-bromo-1,3-dimethylpyrimido[4,5-b]quinoline-2,4(1H,3H)-dione (3ua):

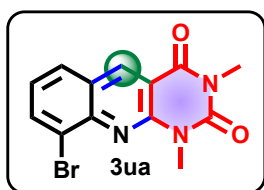

The general procedure (**GPI**) was followed on a 1.0 mmol scale (**2u**) to afford the compound **3ua** as a white solid (0.28 g, 70% yield);  $R_f = 0.3$  (PE:EA = 90:10); **Mp**: 243 – 245 °C;  $^1\text{H NMR}$  (400 MHz,  $\text{CDCl}_3$ )  $\delta$  9.34 (s, 1H), 7.95 (d,  $J = 8.5$  Hz, 1H), 7.78 (d,  $J = 7.4$  Hz, 1H), 7.68 – 7.61 (m, 1H), 3.83 (s, 3H), 3.54 (s, 3H);  $^{13}\text{C NMR}$  (101 MHz,  $\text{CDCl}_3$ ):  $\delta$  160.95, 151.49, 150.57, 149.00, 139.92, 133.13, 129.47, 127.91, 124.52, 123.38, 111.71, 29.77, 28.63; **HRMS** (ESI)  $m/z$  calcd for  $\text{C}_{13}\text{H}_{11}\text{BrN}_3\text{O}_2$   $[\text{M}+\text{H}]^+$  is 320.0029, found 320.0030.

**1,3-dimethyl-2,4-dioxo-1,2,3,4-tetrahydropyrimido[4,5-b]quinoline-7-carbonitrile (3va):**

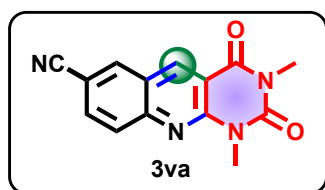

The general procedure (**GPI**) was followed on a 1.0 mmol scale (**2v**) to afford the compound **3va** as a white solid (0.18 g, 66% yield);  $R_f = 0.3$  (PE : EA = 90:10); **Mp**: 239 – 241 °C;  $^1\text{H NMR}$  (400 MHz,  $\text{CDCl}_3$ )  $\delta$  9.06 (s, 1H), 8.34 (d,  $J = 1.3$  Hz, 1H), 8.08 (d,  $J = 8.8$  Hz, 1H), 7.94 (dd,  $J = 8.8, 1.6$  Hz, 1H), 3.84 (s, 3H), 3.54 (s, 3H);  $^{13}\text{C NMR}$  (101 MHz,  $\text{CDCl}_3$ )  $\delta$  160.60, 151.26, 150.89, 150.41, 140.48, 135.28, 133.40, 129.60, 123.85, 118.09, 112.38, 109.42, 29.91, 28.72; **HRMS** (ESI)  $m/z$  calcd for  $\text{C}_{14}\text{H}_{11}\text{N}_4\text{O}_2$   $[\text{M}+\text{H}]^+$  is 267.0877, found 267.0876.

**7-acetyl-1,3-dimethylpyrimido[4,5-b]quinoline-2,4(1H,3H)-dione (3wa):**

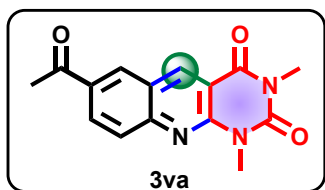

The general procedure (**GPI**) was followed on a 1.0 mmol scale (**2w**) to afford the compound **3wa** as a white solid (0.2 g, 69% yield);  $R_f = 0.3$  (PE:EA = 80:20); **Mp**: 258 – 260 °C; Hexane/Ethyl acetate (60/40, v/v); White solid; isolated yield: %.  $^1\text{H NMR}$  (400 MHz,  $\text{CDCl}_3$ )  $\delta$  9.04 (s, 1H), 8.47 (d,  $J = 1.4$  Hz, 1H), 8.30 (dd,  $J = 8.9, 1.8$  Hz, 1H), 7.96 (d,  $J = 8.9$  Hz, 1H), 3.77 (s, 3H), 3.47 (s, 3H), 2.67 (s, 3H);  $^{13}\text{C NMR}$  (101 MHz,  $\text{CDCl}_3$ )  $\delta$  196.78, 161.08, 152.08, 151.59, 150.23, 141.62, 134.33, 131.40, 131.33, 128.79, 123.89, 111.85, 29.96, 28.77, 26.74; **HRMS** (ESI)  $m/z$  calcd for  $\text{C}_{15}\text{H}_{14}\text{N}_3\text{O}_3$   $[\text{M}+\text{H}]^+$  is 284.1030, found 284.1035.

**1,3-diethylpyrimido[4,5-b]quinoline-2,4(1H,3H)-dione (3ab):**

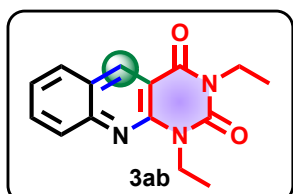

The general procedure (**GP1**) was followed on a 1.0 mmol scale (**2a**) to afford the compound **3ab** as a white solid (0.19 g, 72% yield);  $R_f = 0.3$  (PE:EA = 90:10); **Mp**: 143 – 145 °C;  $^1\text{H NMR}$  (400 MHz,  $\text{CDCl}_3$ )  $\delta$  9.02 (s, 1H), 8.00 (d,  $J = 8.6$  Hz, 1H), 7.94 (d,  $J = 8.1$  Hz, 1H), 7.82 (t,  $J = 7.7$  Hz, 1H), 7.52 (t,  $J = 7.5$  Hz, 1H), 4.56 (q,  $J = 7.0$  Hz, 2H), 4.19 (q,  $J = 7.1$  Hz, 2H), 1.40 (t,  $J = 7.0$  Hz, 3H), 1.33 (t,  $J = 7.1$  Hz, 3H);  $^{13}\text{C NMR}$  (101 MHz,  $\text{CDCl}_3$ )  $\delta$  161.12, 150.70, 150.02, 147.94, 140.02, 132.96, 129.19, 128.22, 125.65, 124.71, 111.21, 37.81, 37.08, 13.21, 13.11; **HRMS** (ESI)  $m/z$  calcd for  $\text{C}_{15}\text{H}_{16}\text{N}_3\text{O}_2$   $[\text{M}+\text{H}]^+$  is 270.1237, found 270.1247.

---

### ***1,3-dicyclohexylpyrimido[4,5-*b*]quinoline-2,4(1*H*,3*H*)-dione (3ac):***

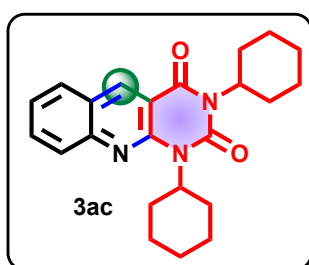

The general procedure (**GP1**) was followed on a 1.0 mmol scale (**2a**) to afford the compound **3ac** as a white solid (0.25 g, 66% yield);  $R_f = 0.3$  (PE:EA = 90:10); **Mp**: 248 – 250 °C;  $^1\text{H NMR}$  (400 MHz,  $\text{CDCl}_3$ )  $\delta$  9.00 (s, 1H), 8.00 (d,  $J = 8.5$  Hz, 1H), 7.94 (d,  $J = 8.1$  Hz, 1H), 7.81 (t,  $J = 7.7$  Hz, 1H), 7.51 (t,  $J = 7.5$  Hz, 1H), 5.57 (s, 1H), 5.00 – 4.83 (m, 1H), 2.75 – 2.71 (m, 2H), 2.56 – 2.47 (m, 2H), 1.96 – 1.88 (m, 4H), 1.80 – 1.70 (m, 6H), 1.59 – 1.27 (m, 6H);  $^{13}\text{C NMR}$  (101 MHz,  $\text{CDCl}_3$ ):  $\delta$  161.75, 150.88, 149.44, 148.57, 140.03, 132.72, 129.03, 128.15, 125.54, 124.62, 111.90, 55.41, 55.12, 29.03, 28.99, 26.66, 26.49, 25.56, 25.36; **HRMS** (ESI)  $m/z$  calcd for  $\text{C}_{23}\text{H}_{28}\text{N}_3\text{O}_2$   $[\text{M}+\text{H}]^+$  is 378.2176, found 378.2197.

---

### **Gram Scale Experiments:**

A solution of aniline (**1a**, 12.0 mmol, 1.12 g), 1,3-dimethyl barbituric acid (**2a**, 14.4 mmol; 2.25 g), and DMSO (36 mL) was placed in an ace pressure tube and heated in a preheated oil bath at 120 °C. The mixture was stirred for 12 hours. After completion of the reaction, the mixture was allowed to cool to room temperature and was then diluted with ethyl acetate (150 mL). The organic layer was washed successively with water (100 mL), sodium bicarbonate solution (60 mL), and brine (60 mL). The organic layer was dried over anhydrous sodium sulfate, and the solvent was evaporated under reduced pressure to obtain the crude product. The crude product was purified by column chromatography using a 20% ethyl acetate/hexane mixture on 100-200 mesh silica gel to afford the product **3aa** as a white solid (2.0 g, 69% yield).

---

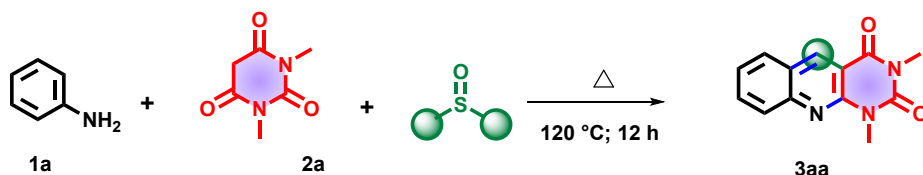


---

Synthesis of **3aa** in gram scale level

---

**1,3-dimethylpyrimido[4,5-b]quinoline-2,4(1H,3H)-dione-5-d (3aa-d):**

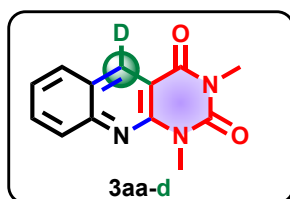

A solution of aniline (**1a**, 1.0 mmol, 0.091 mL), barbituric acid (**2a**, 1.2 mmol; 0.15g), and DMSO  $d_6$  (3.0 mL) was placed in an Ace pressure tube and heated in a preheated oil bath at 120 °C. The mixture was stirred for 12 hours. After completion of the reaction, the mixture was allowed to cool to room temperature and was then diluted with ethyl acetate (10 mL). The organic layer was washed successively with water (10 mL), sodium bicarbonate solution (10 mL), and brine (10 mL). The organic layer was dried over anhydrous sodium sulfate, and the solvent was evaporated under reduced pressure to obtain the crude product. The crude product was purified by column chromatography using a 20% ethyl acetate/hexane mixture on 100-200 mesh silica gel to afford the product **3aa-d** as a white solid (0.17 g, 69% yield); **Mp**: 200-202 °C;  $^1\text{H NMR}$  (400 MHz,  $\text{CDCl}_3$ )  $\delta$  8.00 (d,  $J = 8.5$  Hz, 1H), 7.95 (d,  $J = 7.5$  Hz, 1H), 7.87 – 7.79 (m, 1H), 7.57 – 7.49 (m, 1H), 3.84 (s, 3H), 3.53 (s, 3H); HRMS (ESI)  $m/z$  calcd for  $\text{C}_{13}\text{H}_{11}\text{DN}_3\text{O}_2$   $[\text{M}+\text{H}]^+$  is 243.0987, found 243.0981.

---

$^1\text{H}$  and  $^{13}\text{C}$  NMR of **3aa** in  $\text{CDCl}_3$

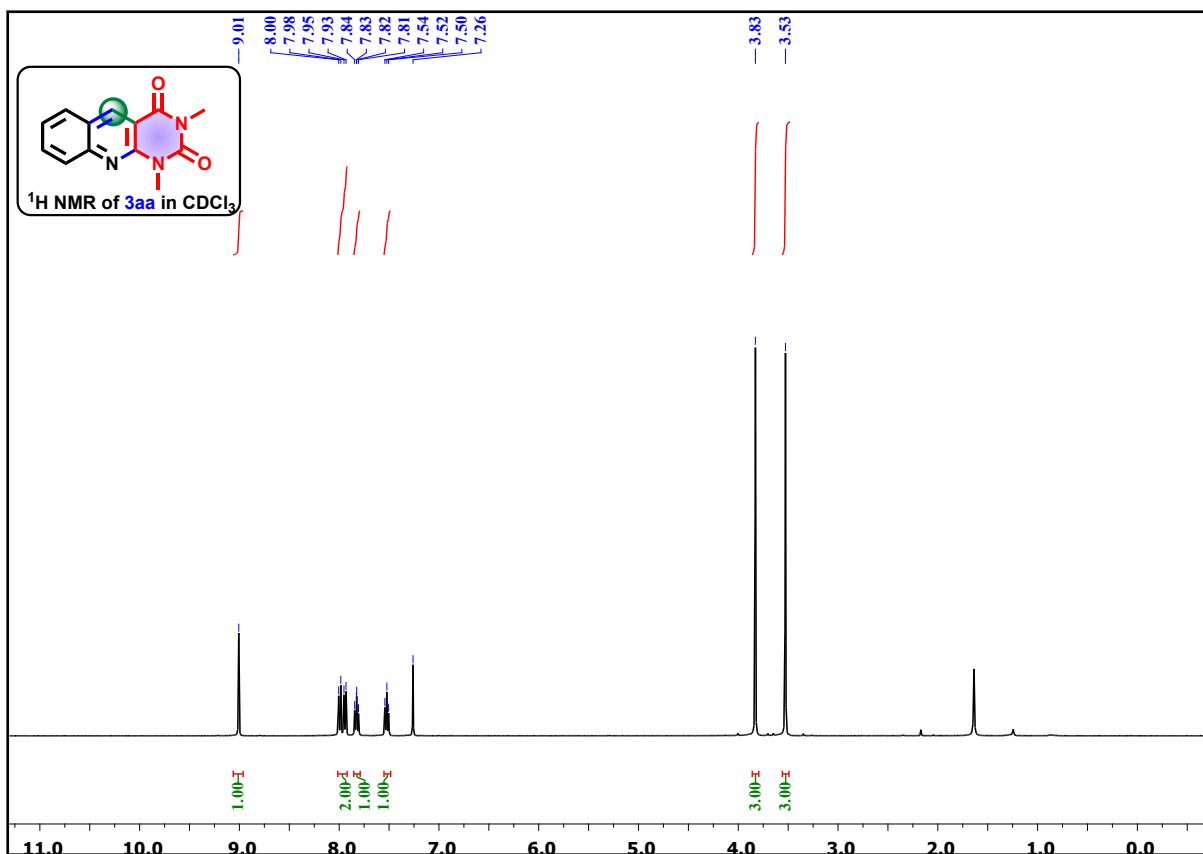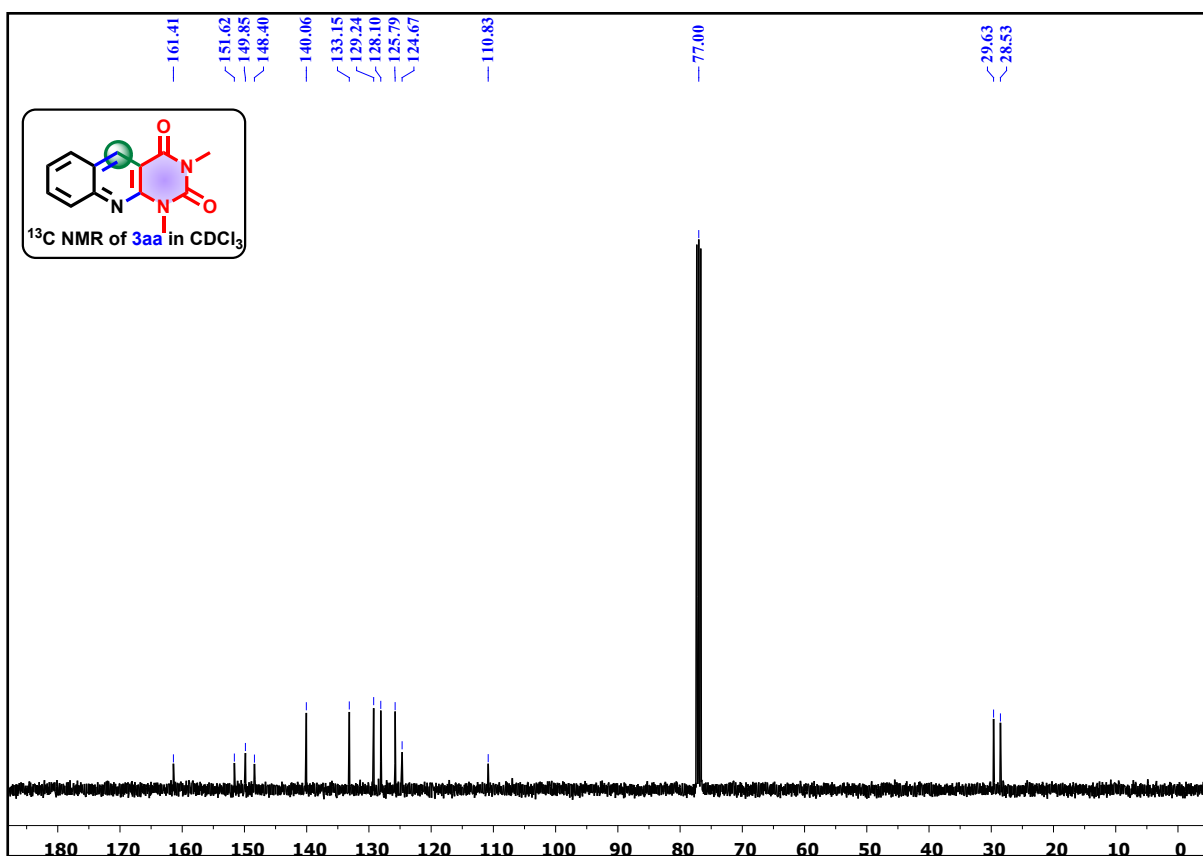

<sup>1</sup>H and <sup>13</sup>C NMR of **3ba** in CDCl<sub>3</sub>

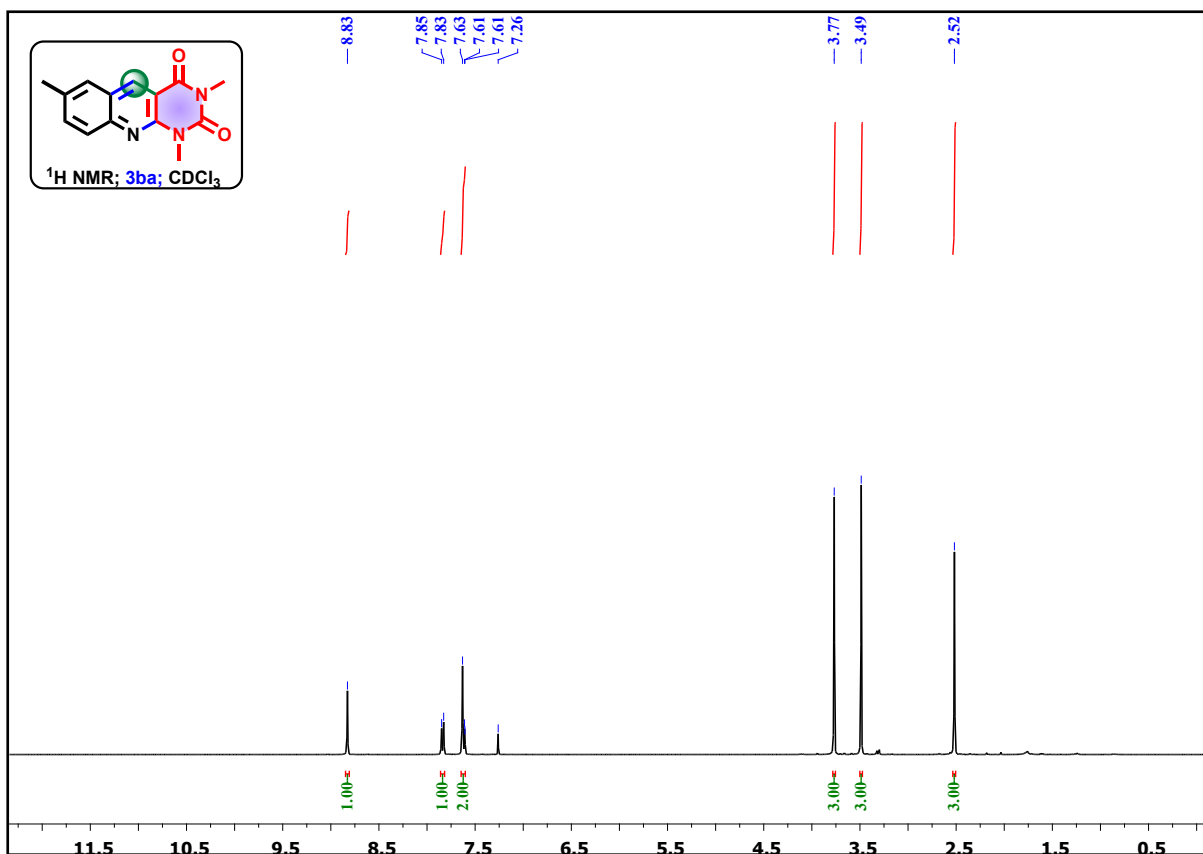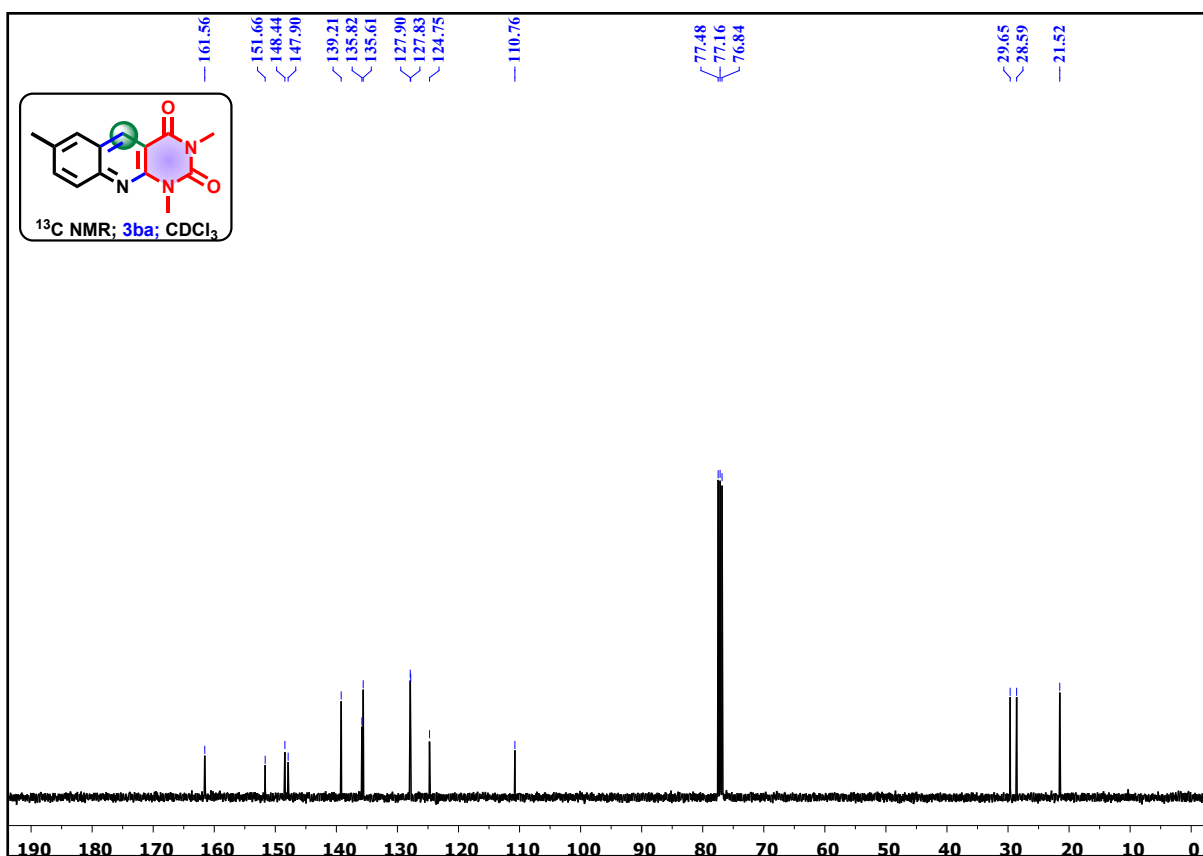

<sup>1</sup>H and <sup>13</sup>C NMR of 3ca in CDCl<sub>3</sub>

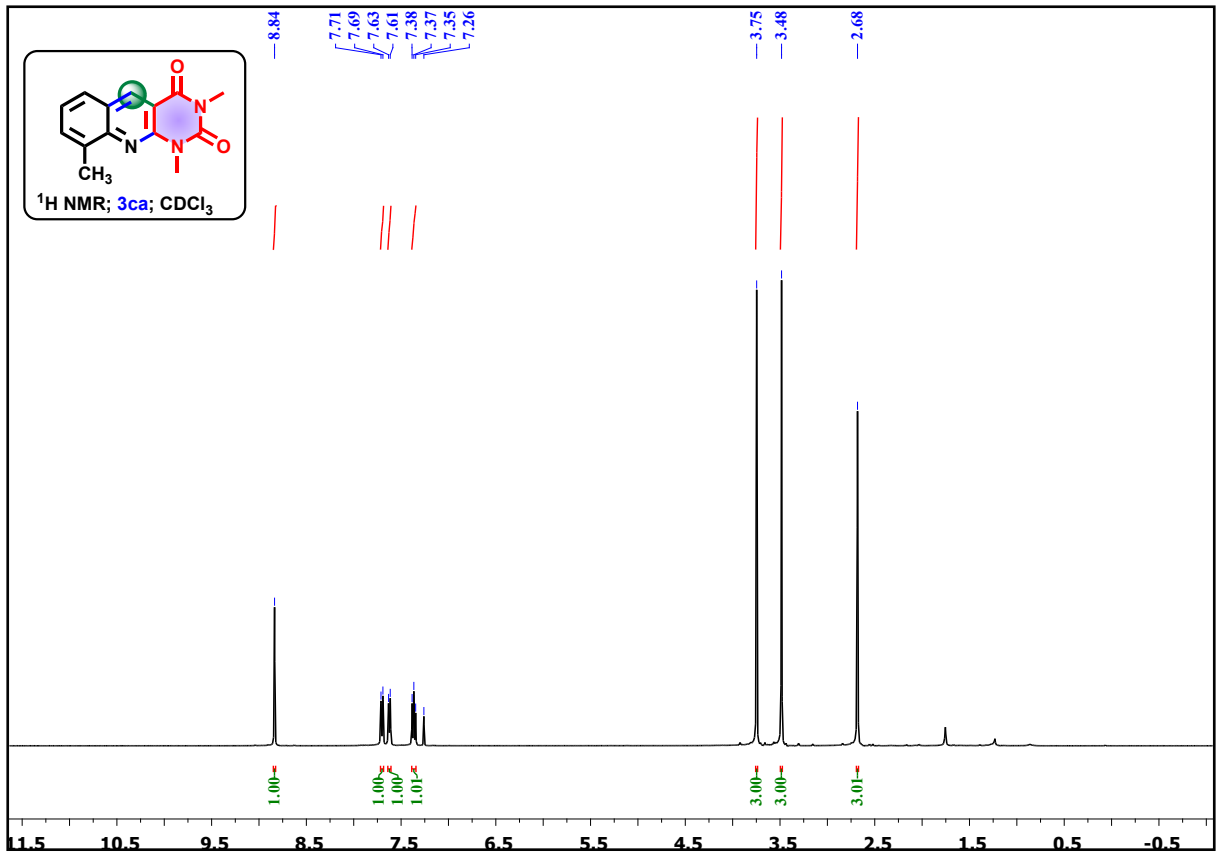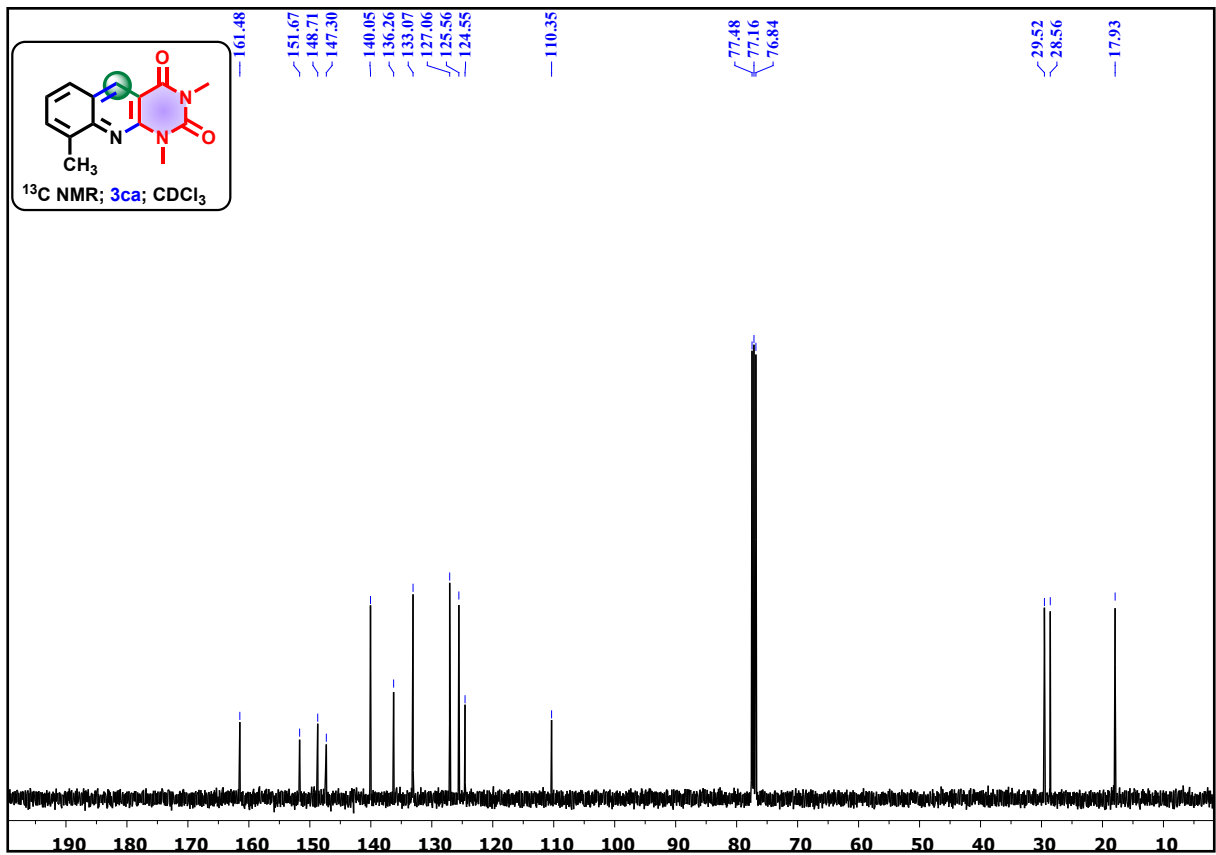

$^1\text{H}$  and  $^{13}\text{C}$  NMR of **3da** in  $\text{CDCl}_3$

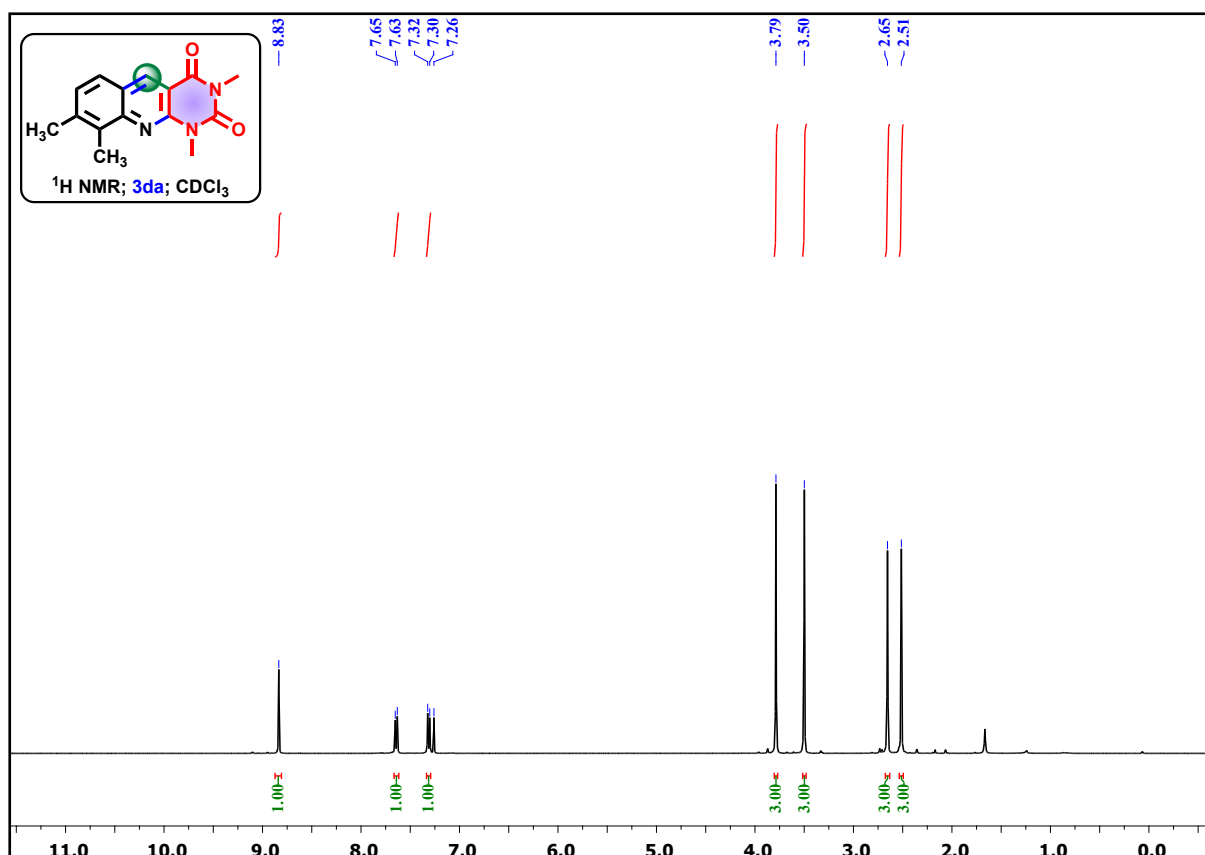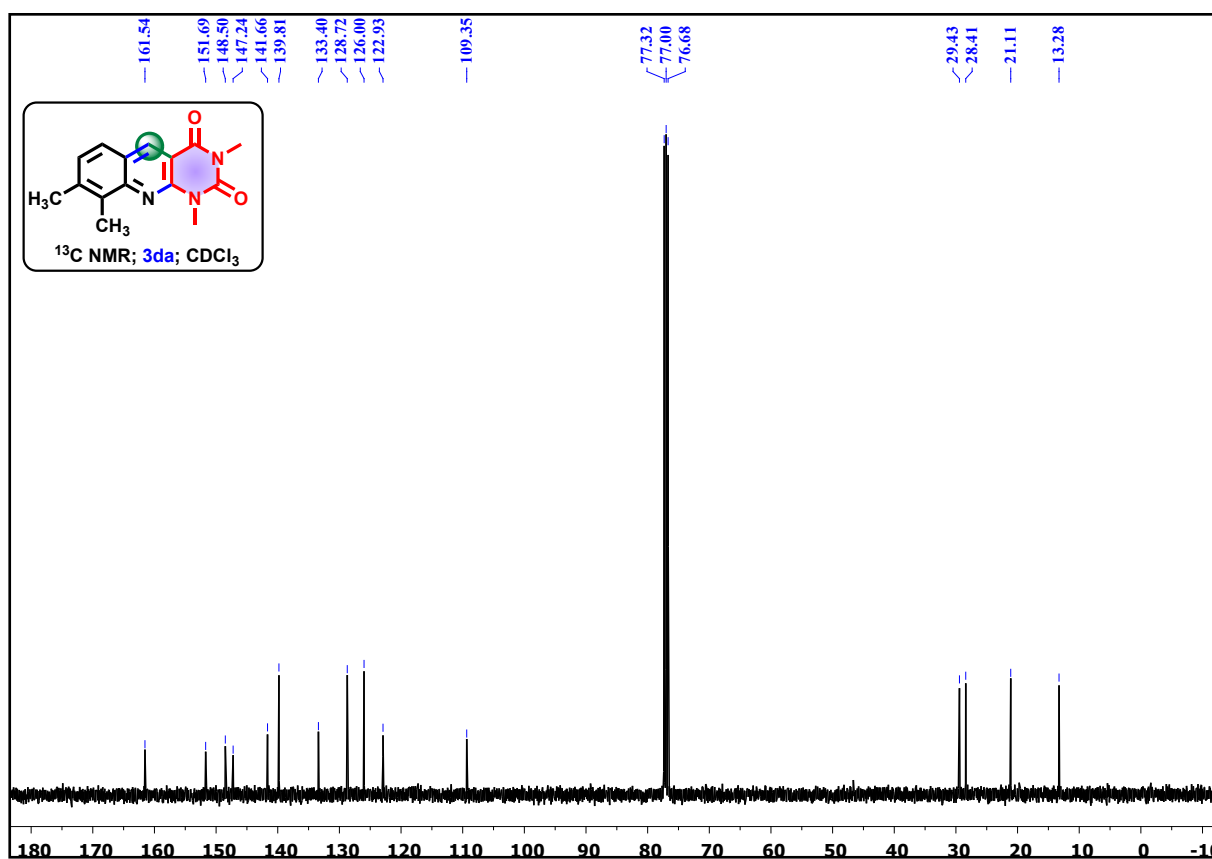



$^1\text{H}$  and  $^{13}\text{C}$  NMR of **3ea** in  $\text{CDCl}_3$

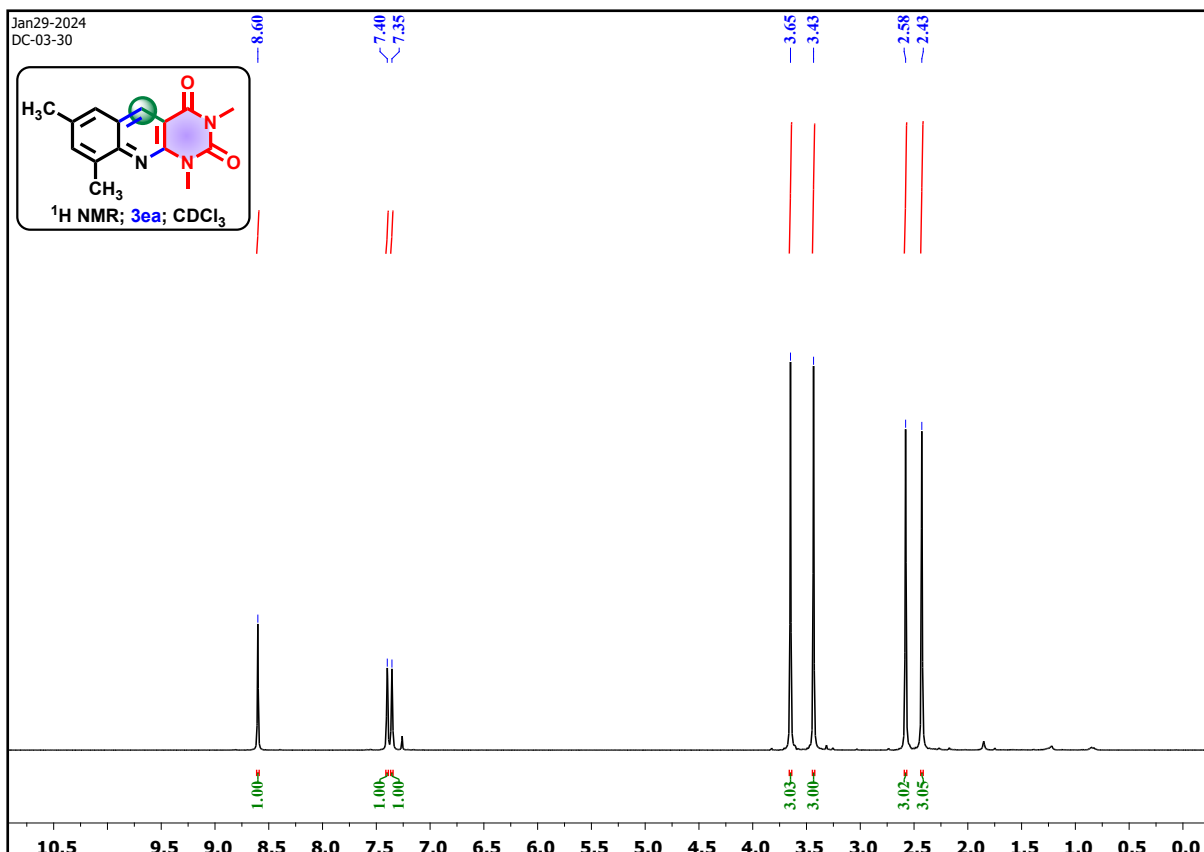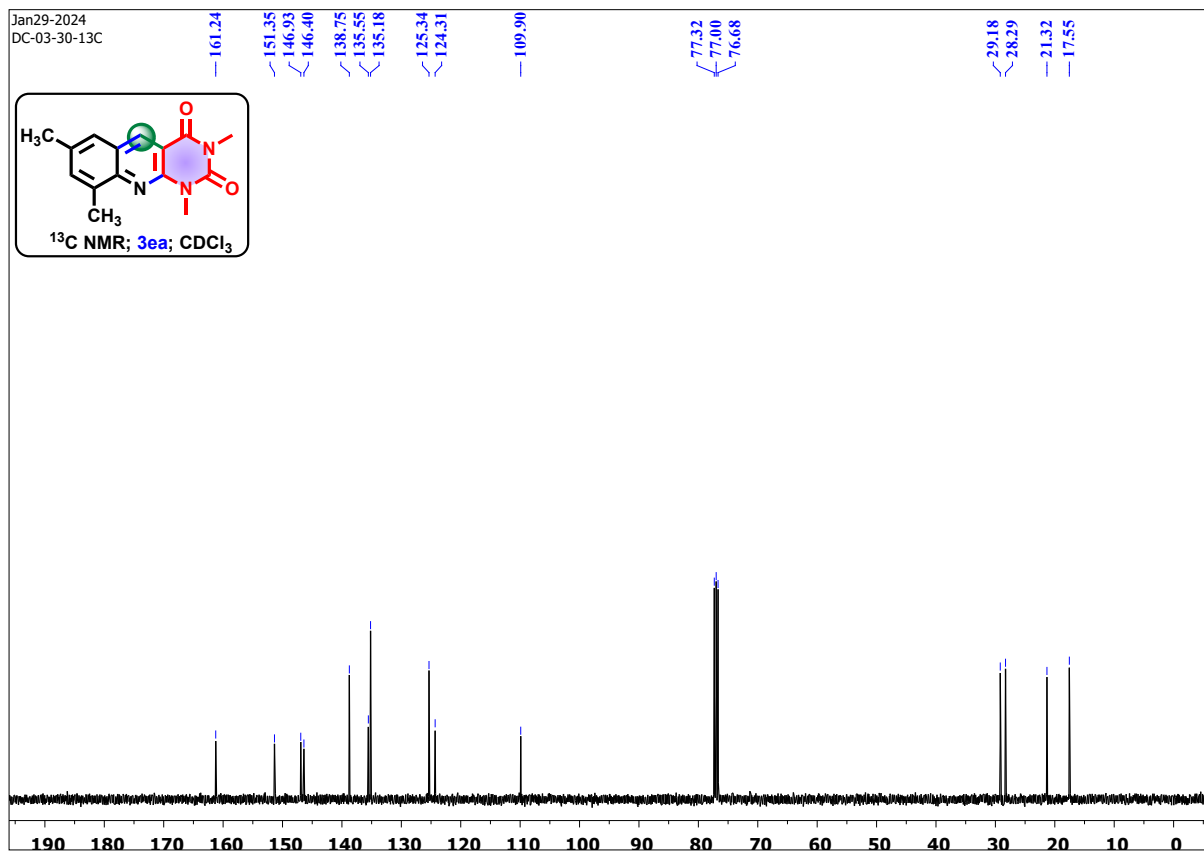

$^1\text{H}$  and  $^{13}\text{C}$  NMR of **3fa** in  $\text{CDCl}_3$

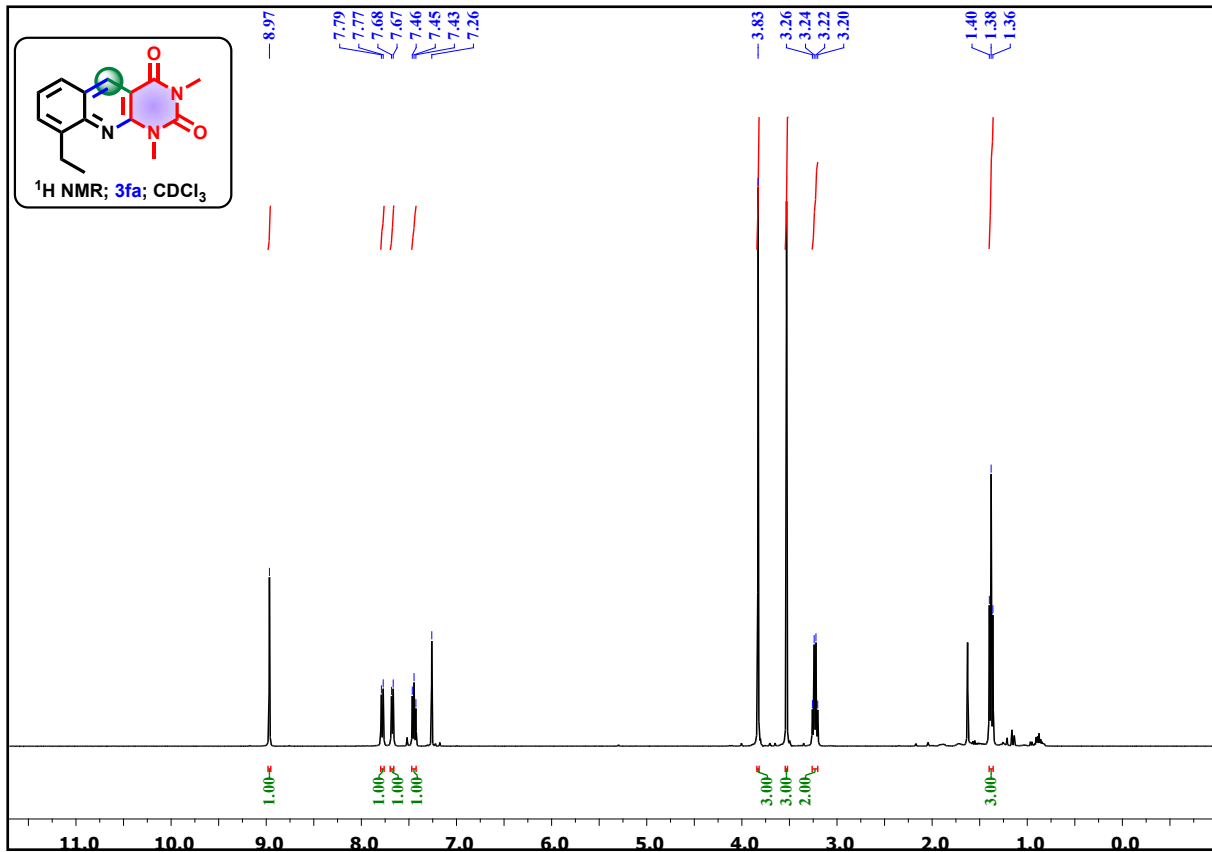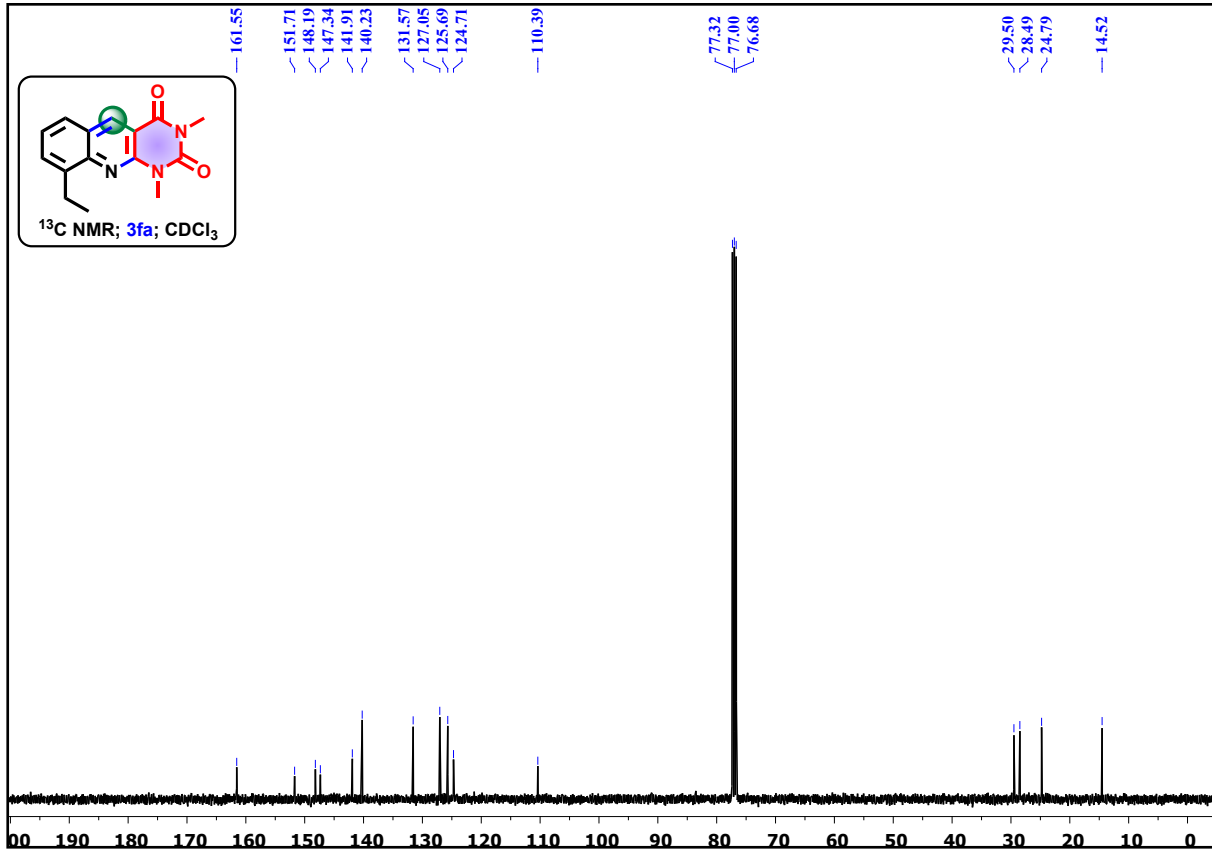

$^1\text{H}$  and  $^{13}\text{C}$  NMR of **3ga** in  $\text{CDCl}_3$

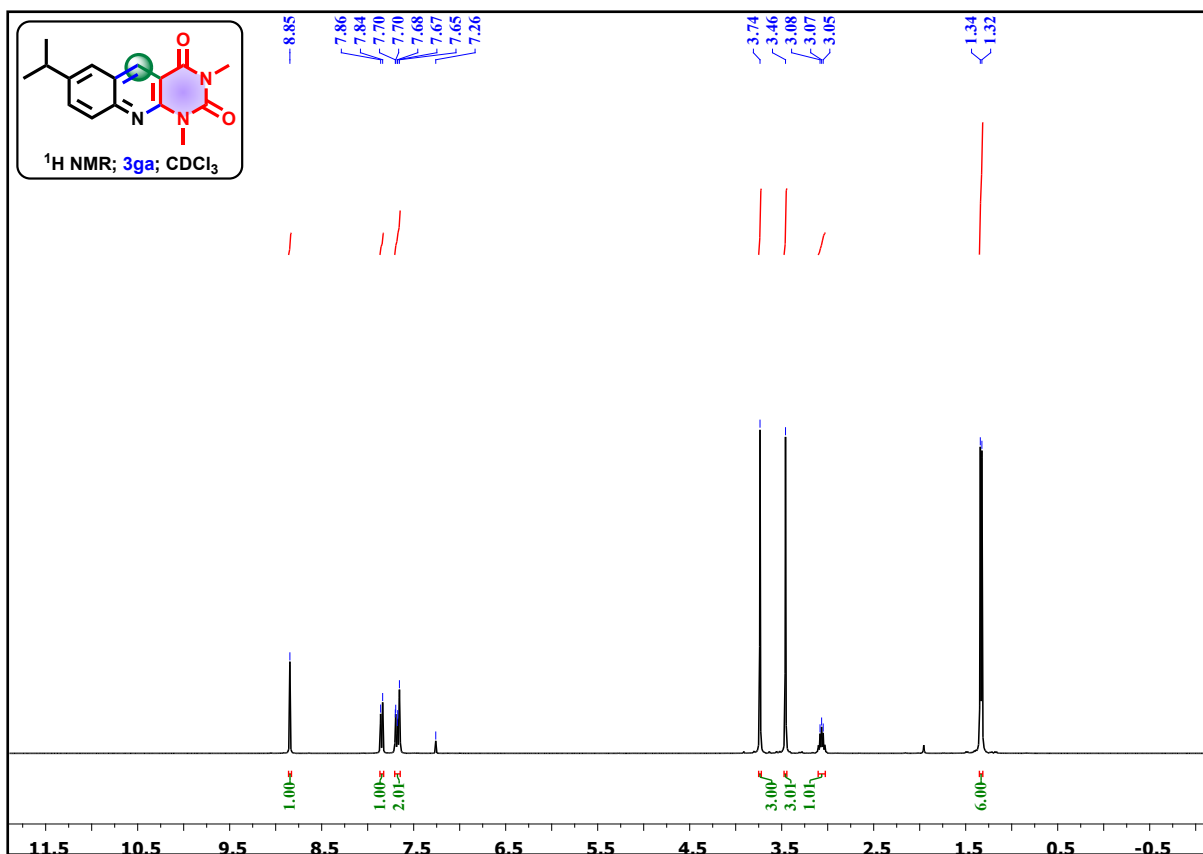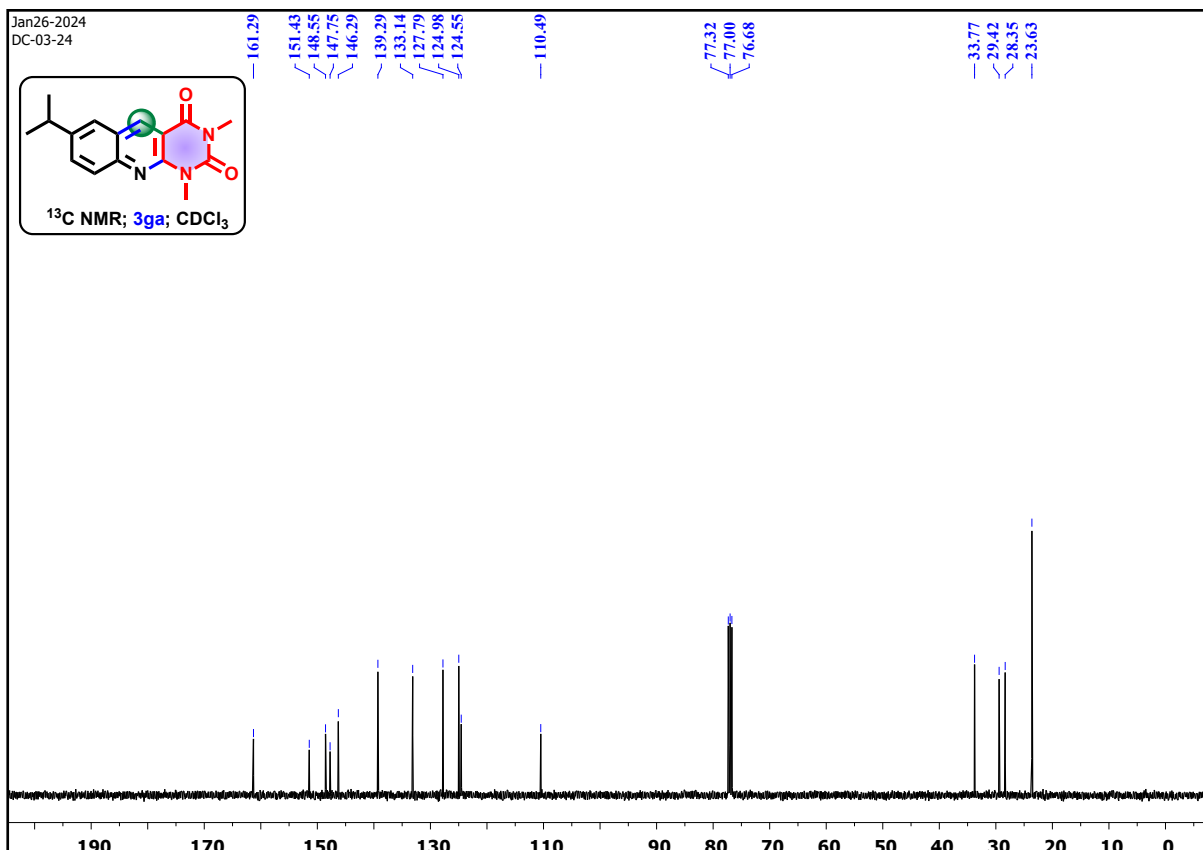

<sup>1</sup>H and <sup>13</sup>C NMR of **3ha** in CDCl<sub>3</sub>

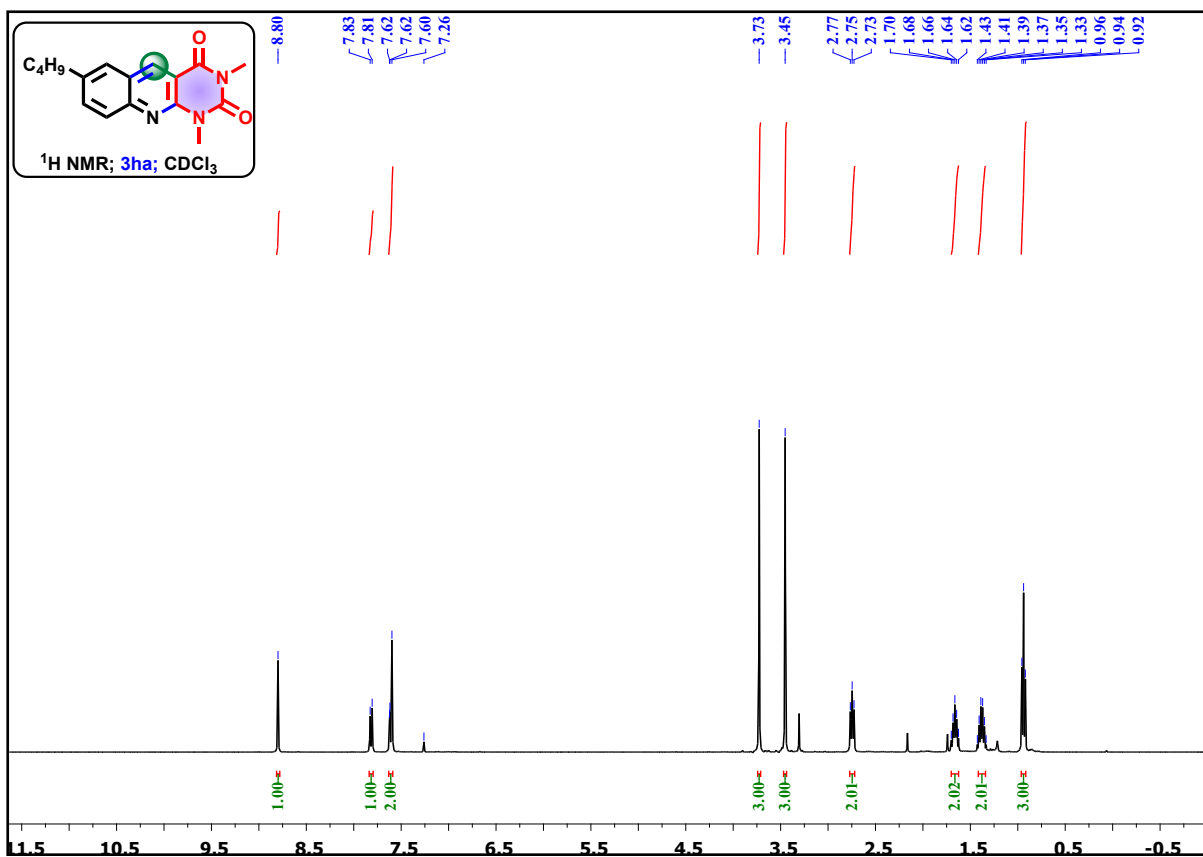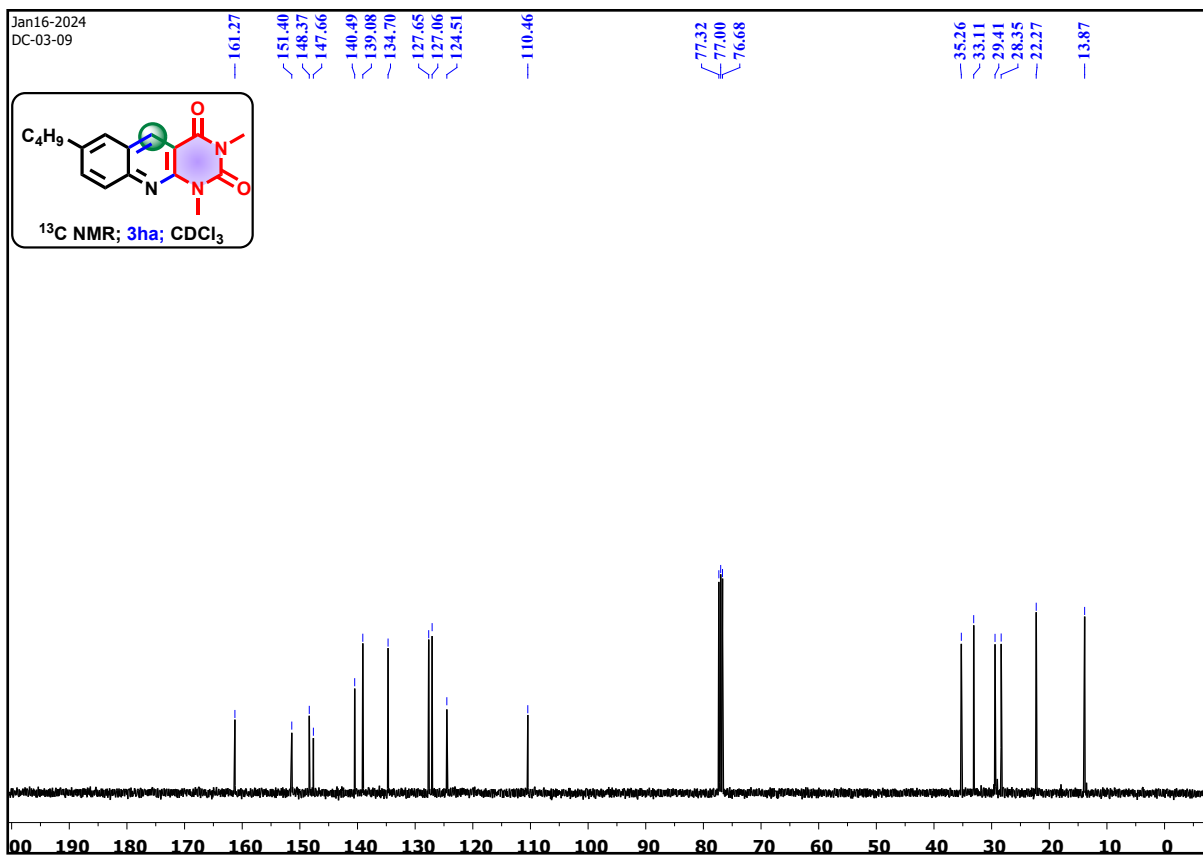

$^1\text{H}$  and  $^{13}\text{C}$  NMR of **3ia** in  $\text{CDCl}_3$

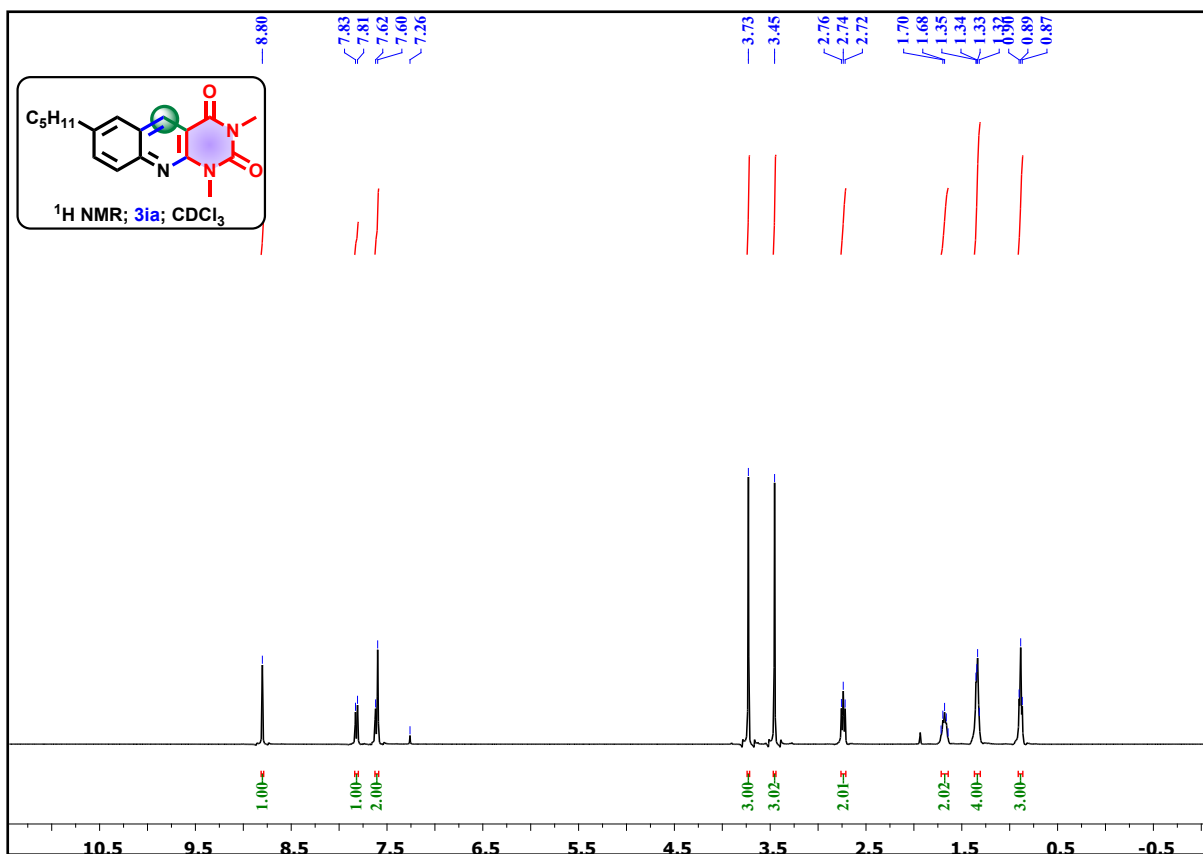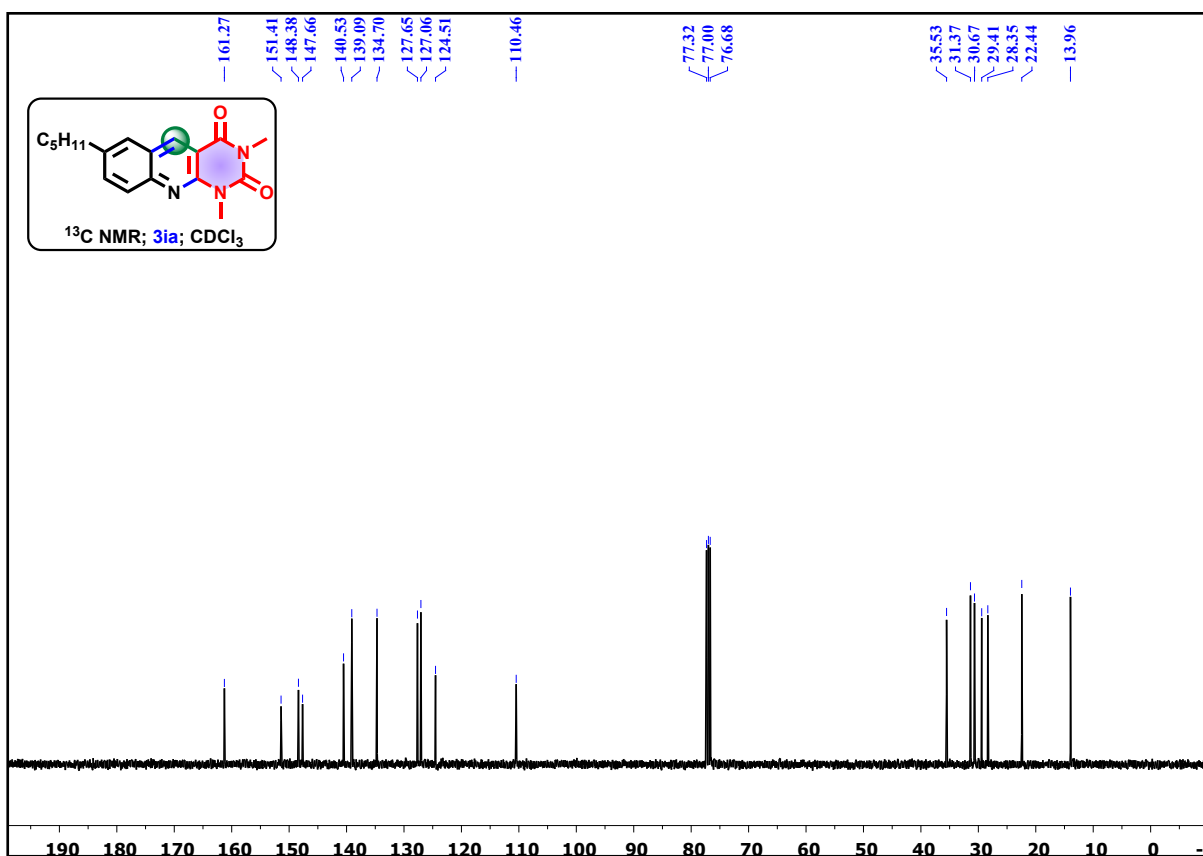

<sup>1</sup>H and <sup>13</sup>C NMR of 3ia in CDCl<sub>3</sub>

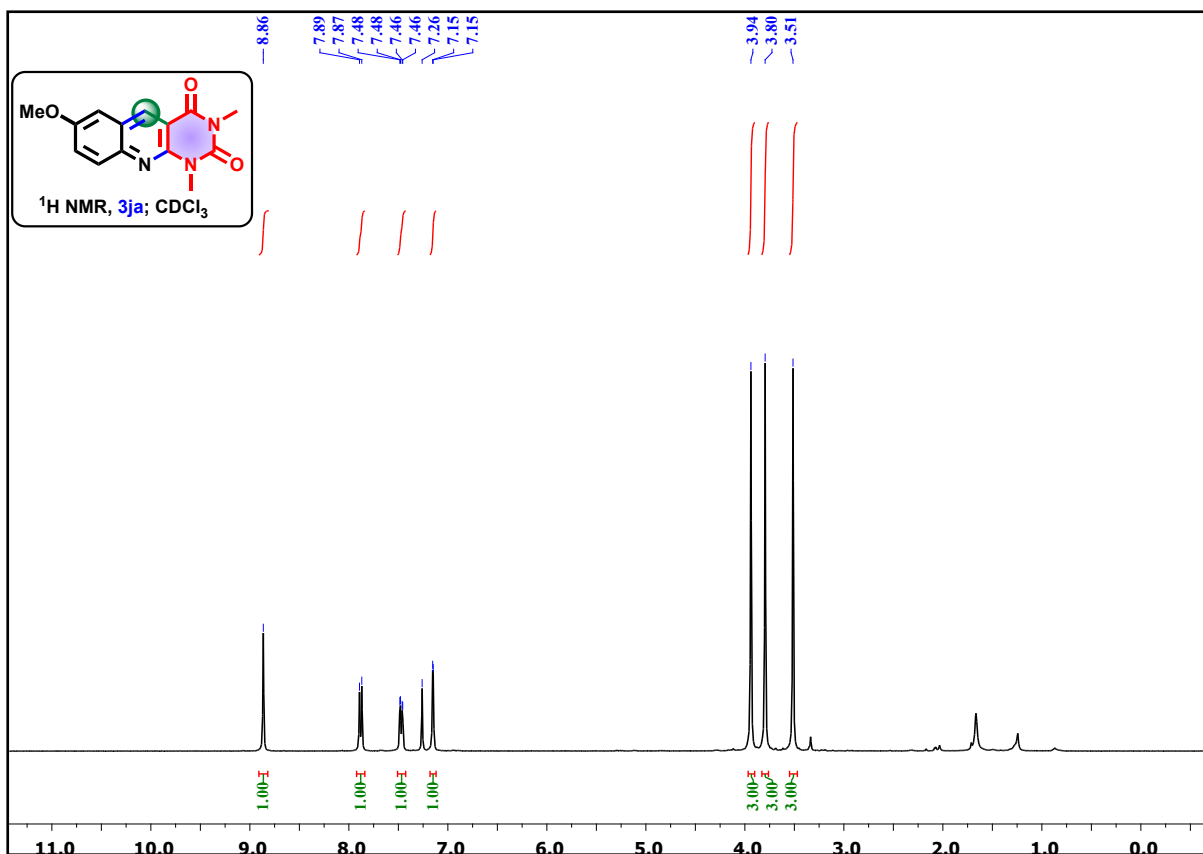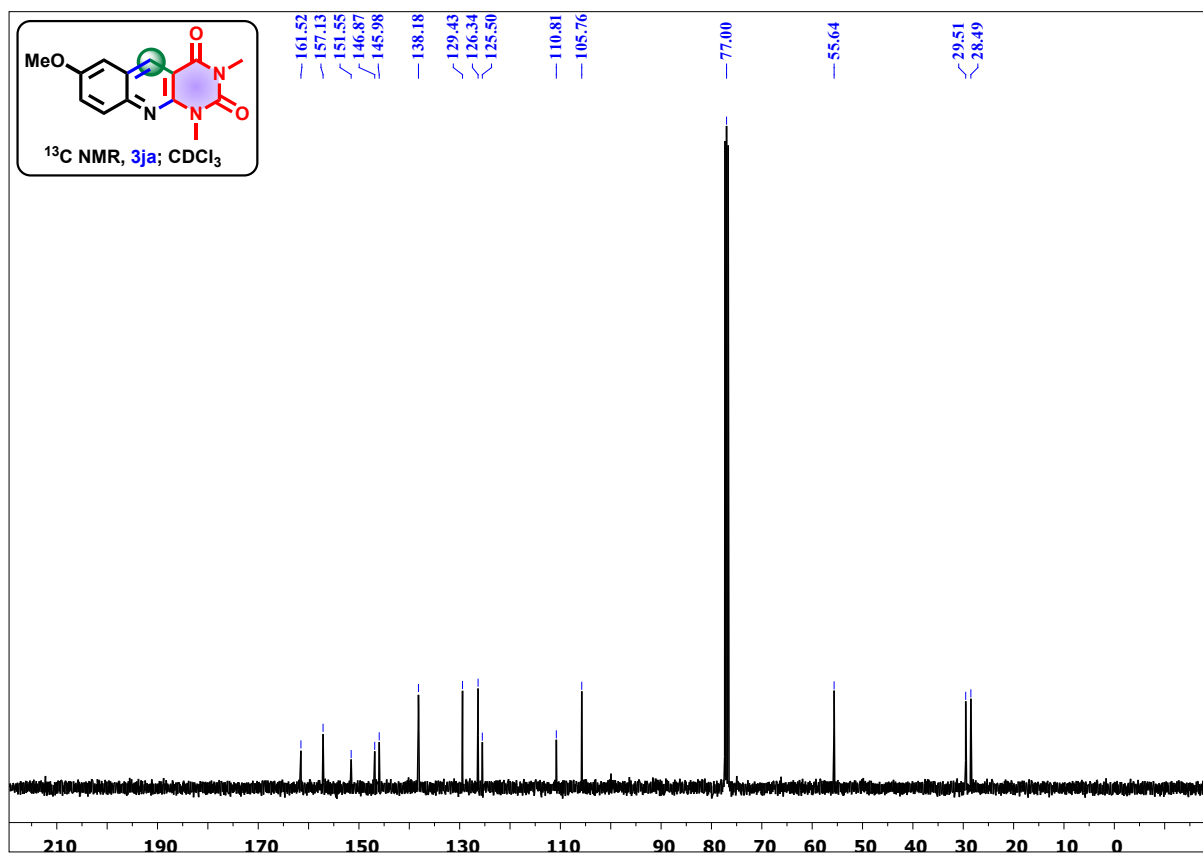

<sup>1</sup>H and <sup>13</sup>C NMR of 3ka in CDCl<sub>3</sub>

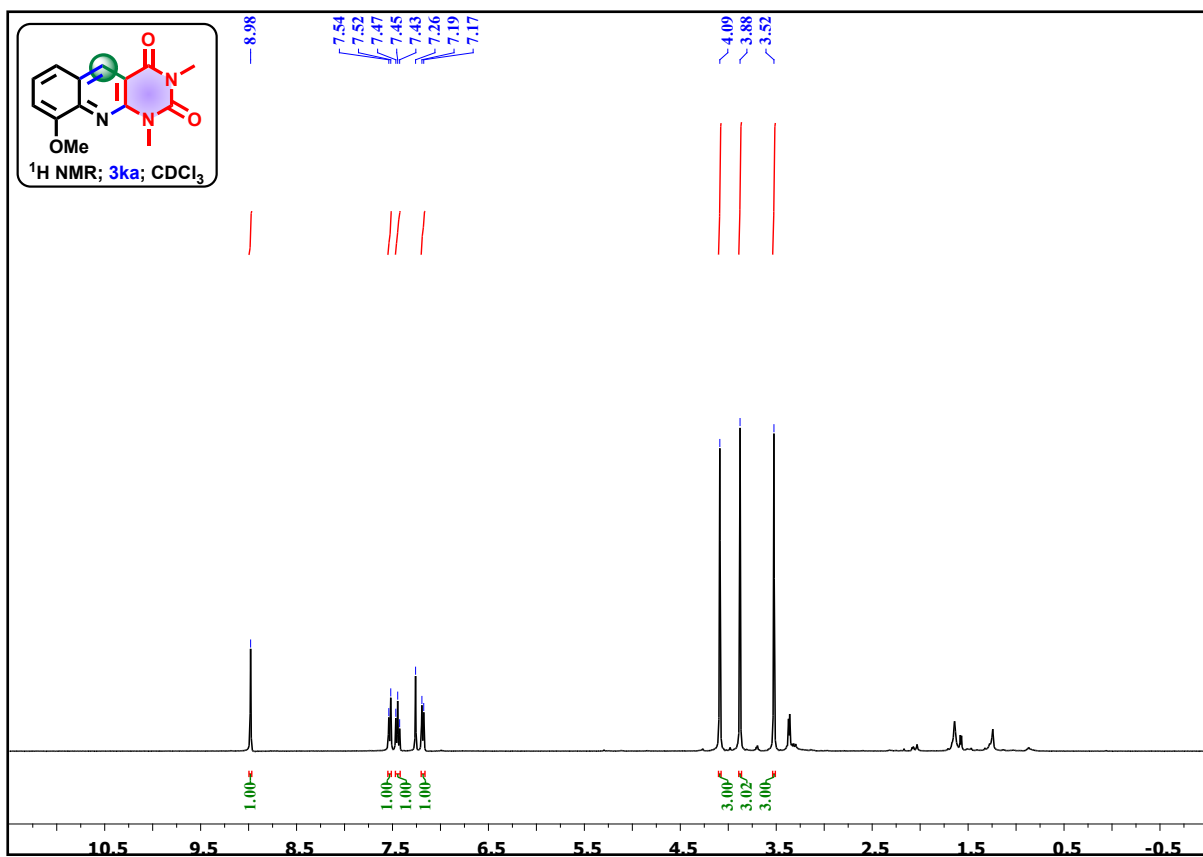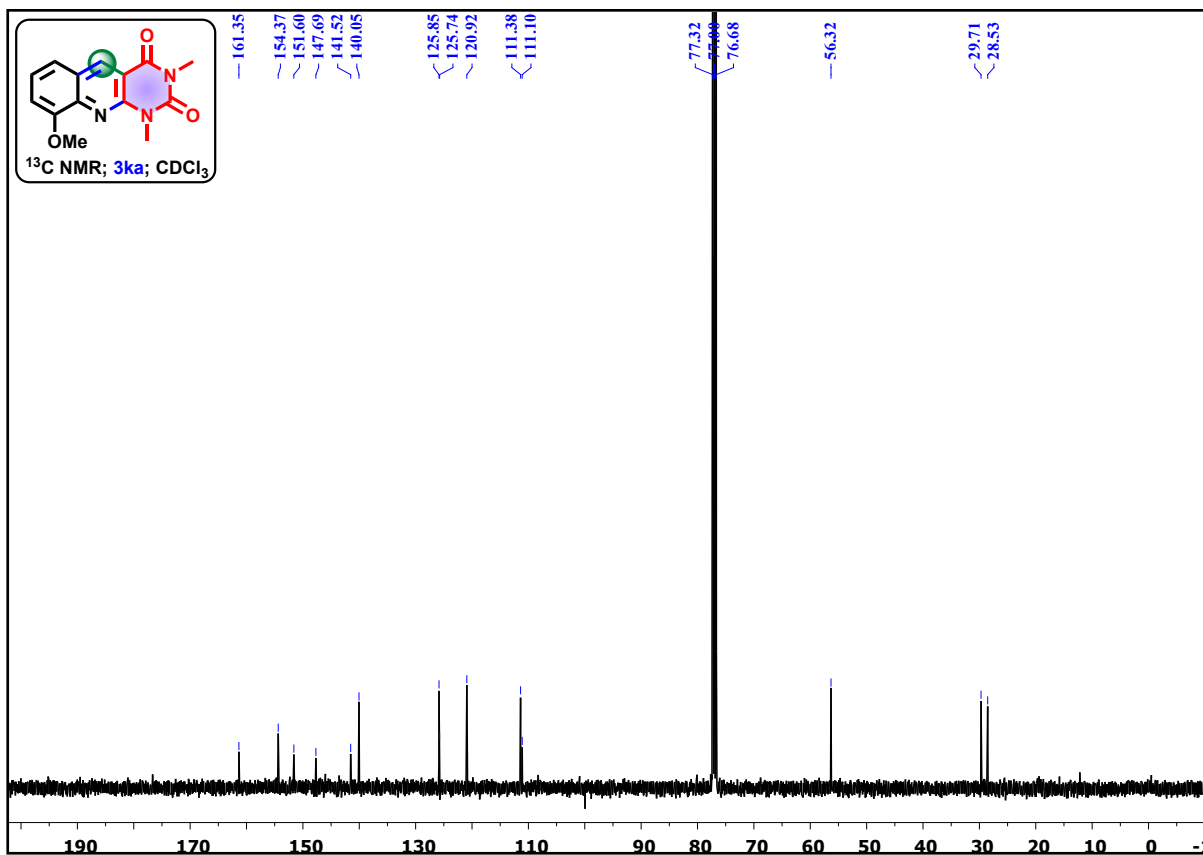

<sup>1</sup>H and <sup>13</sup>C NMR of **3la** in CDCl<sub>3</sub>

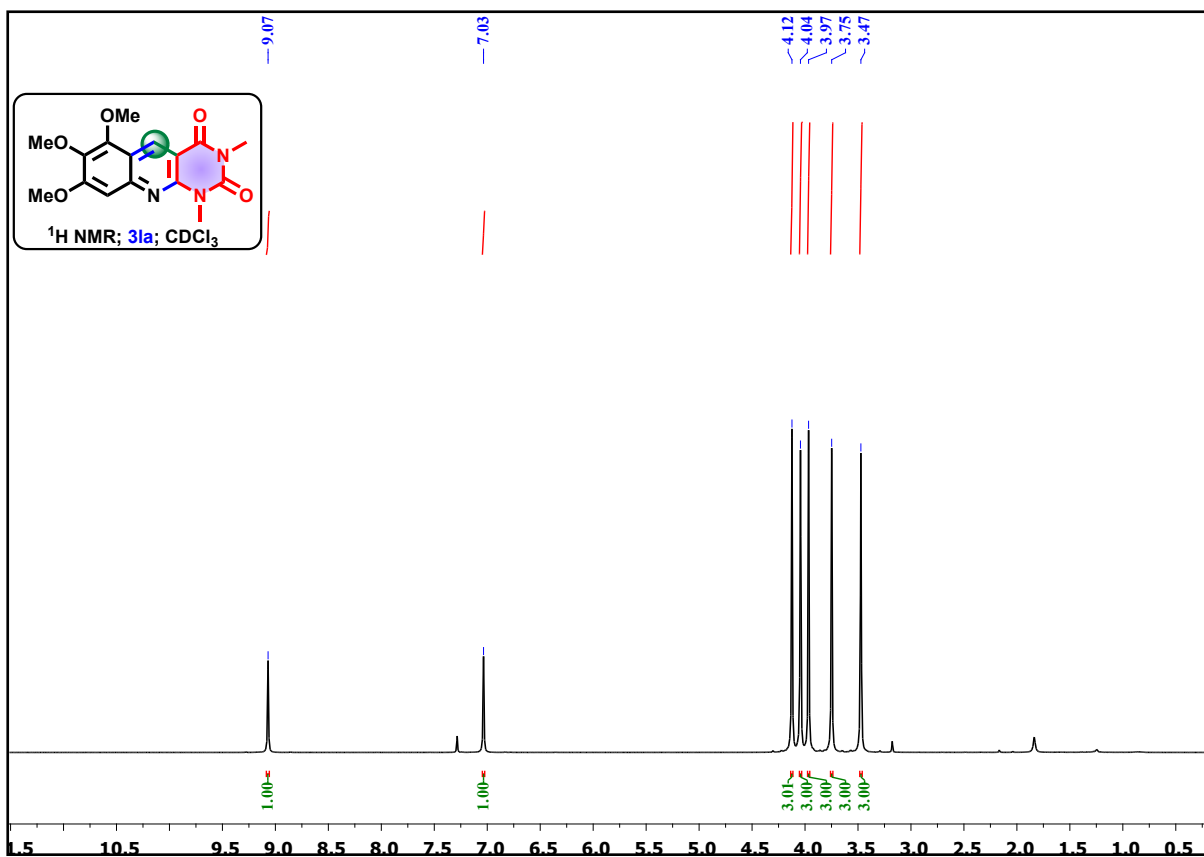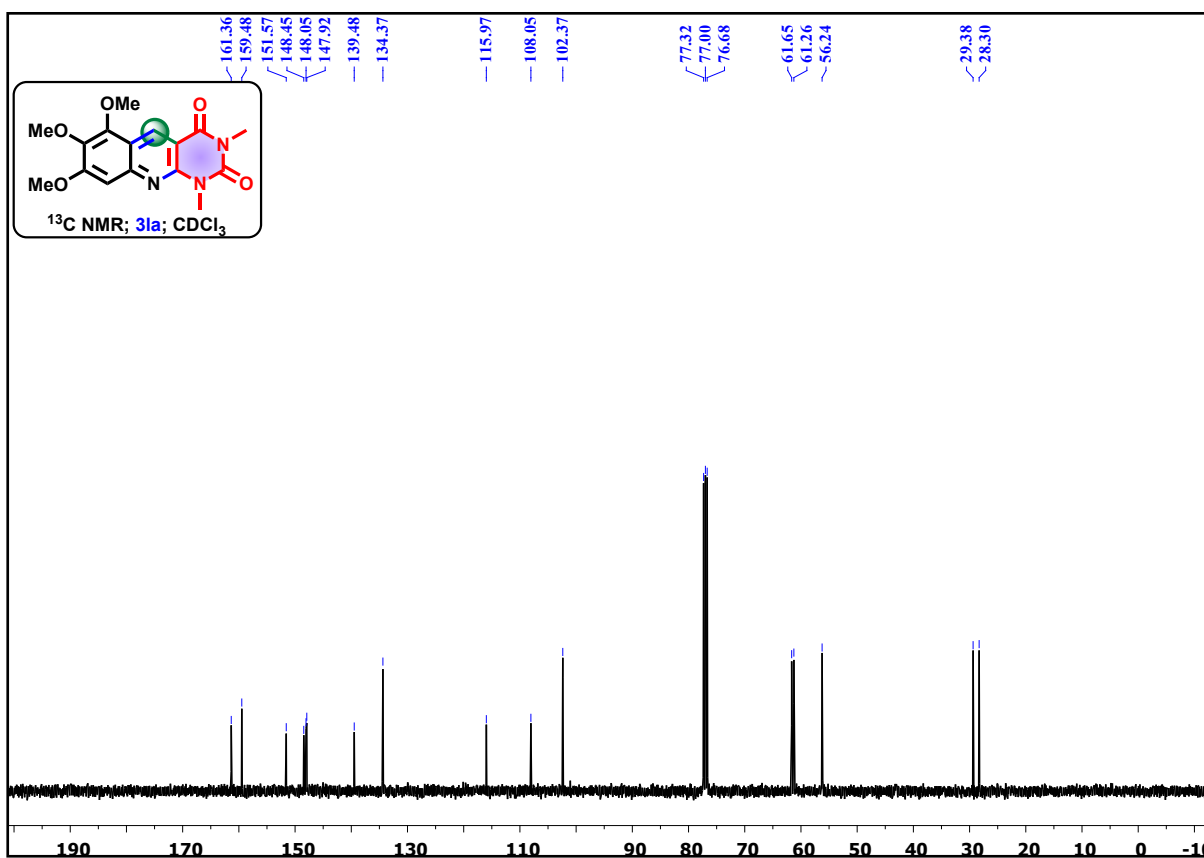

<sup>1</sup>H and <sup>13</sup>C NMR of 3ma in CDCl<sub>3</sub>



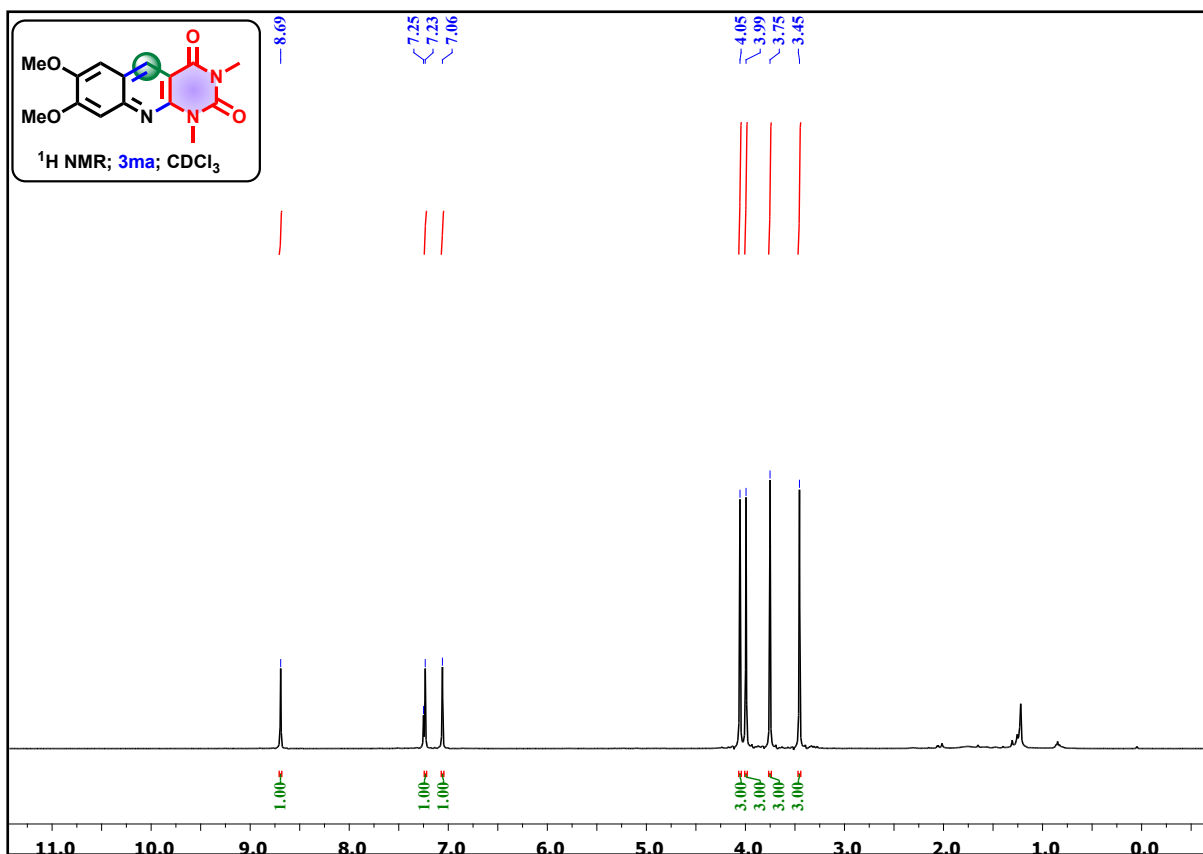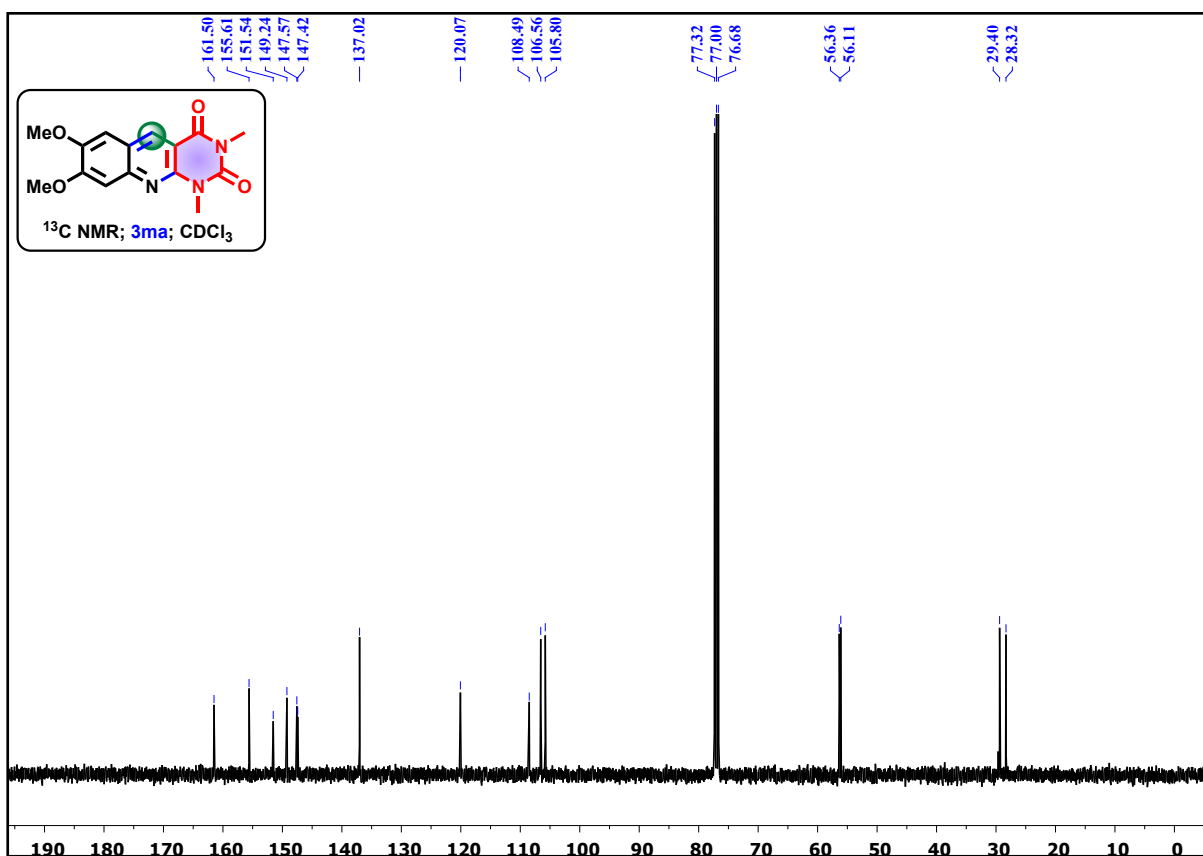

<sup>1</sup>H and <sup>13</sup>C NMR of 3na in CDCl<sub>3</sub>

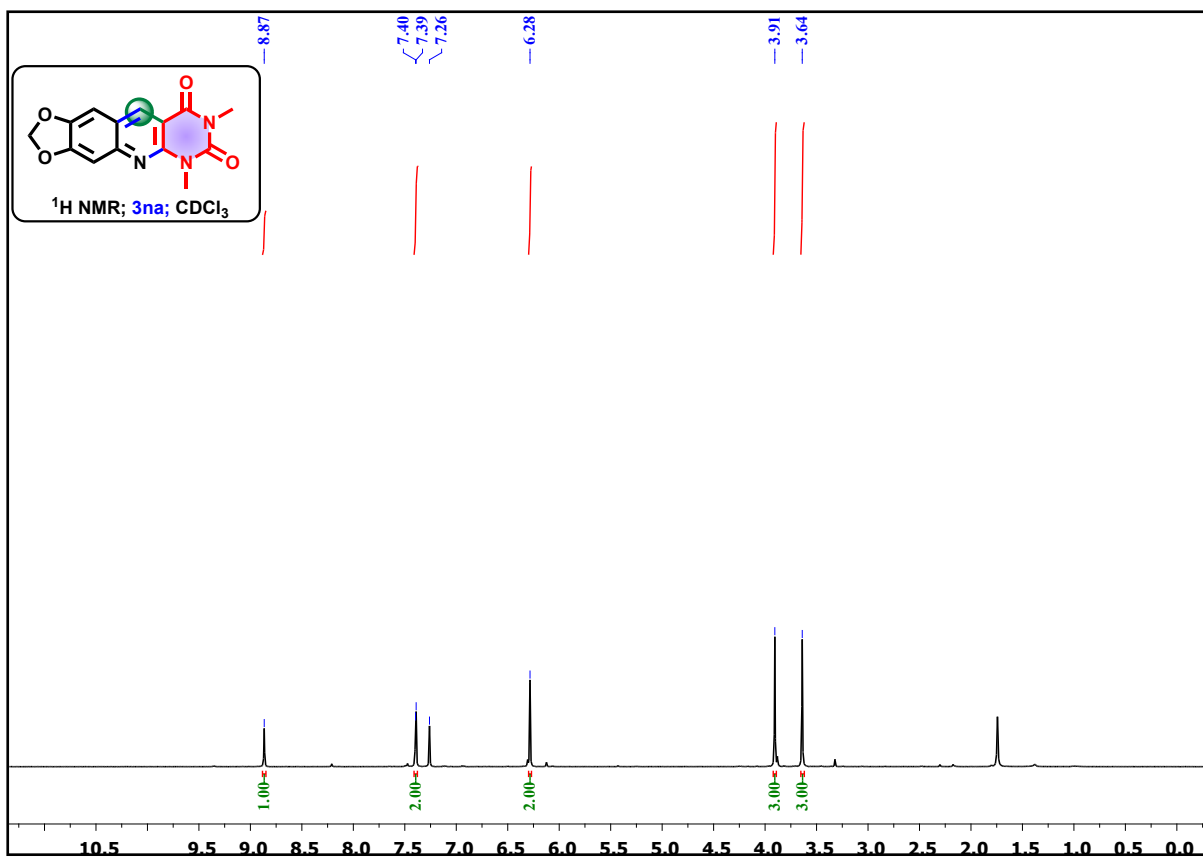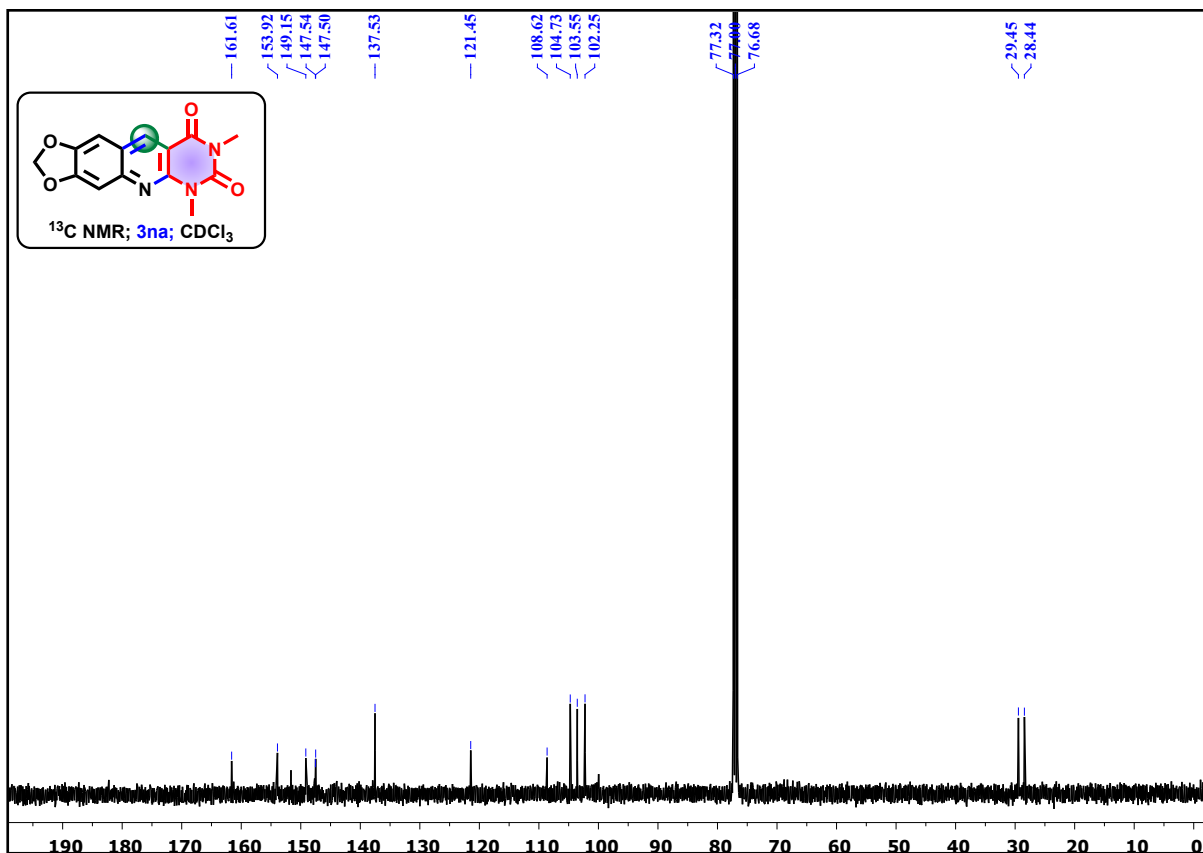

<sup>1</sup>H and <sup>13</sup>C NMR of 3oa in CDCl<sub>3</sub>

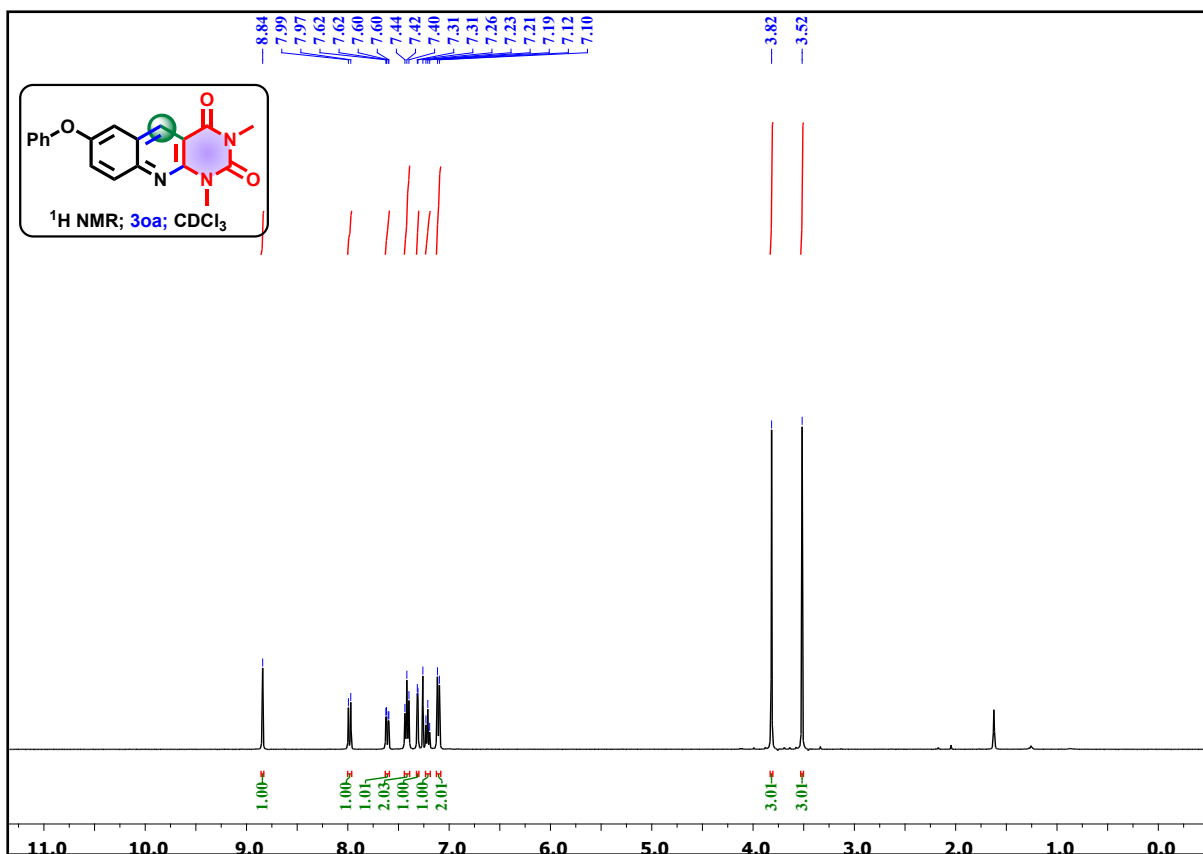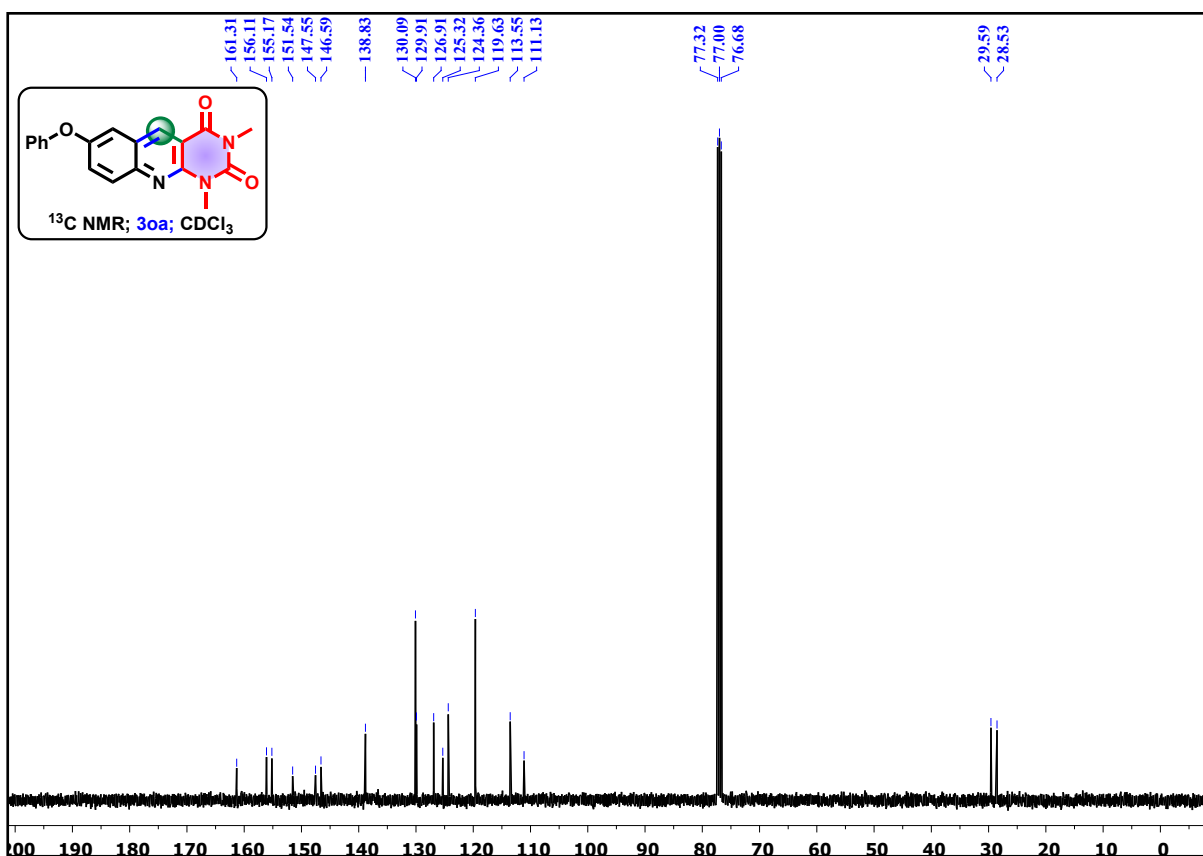

<sup>1</sup>H and <sup>13</sup>C NMR of mixture of **3pa** and **3pa'** in CDCl<sub>3</sub>

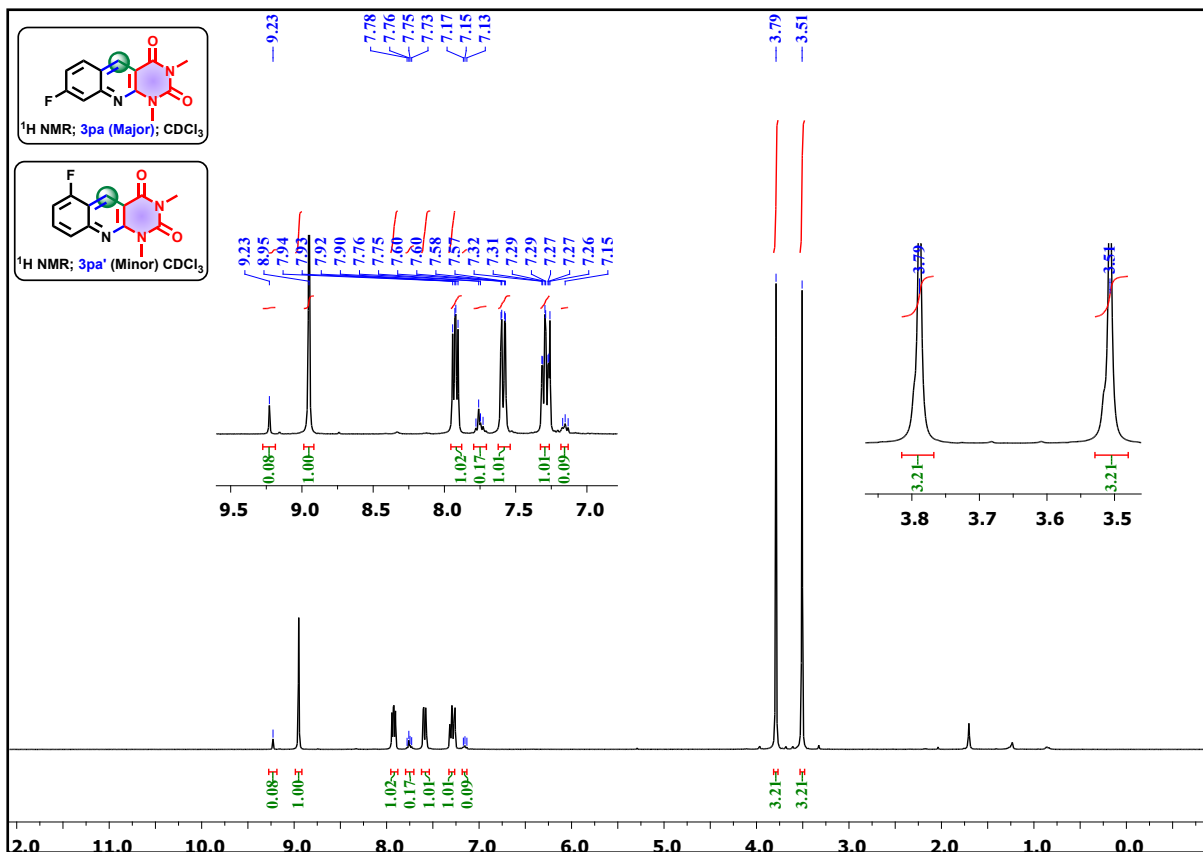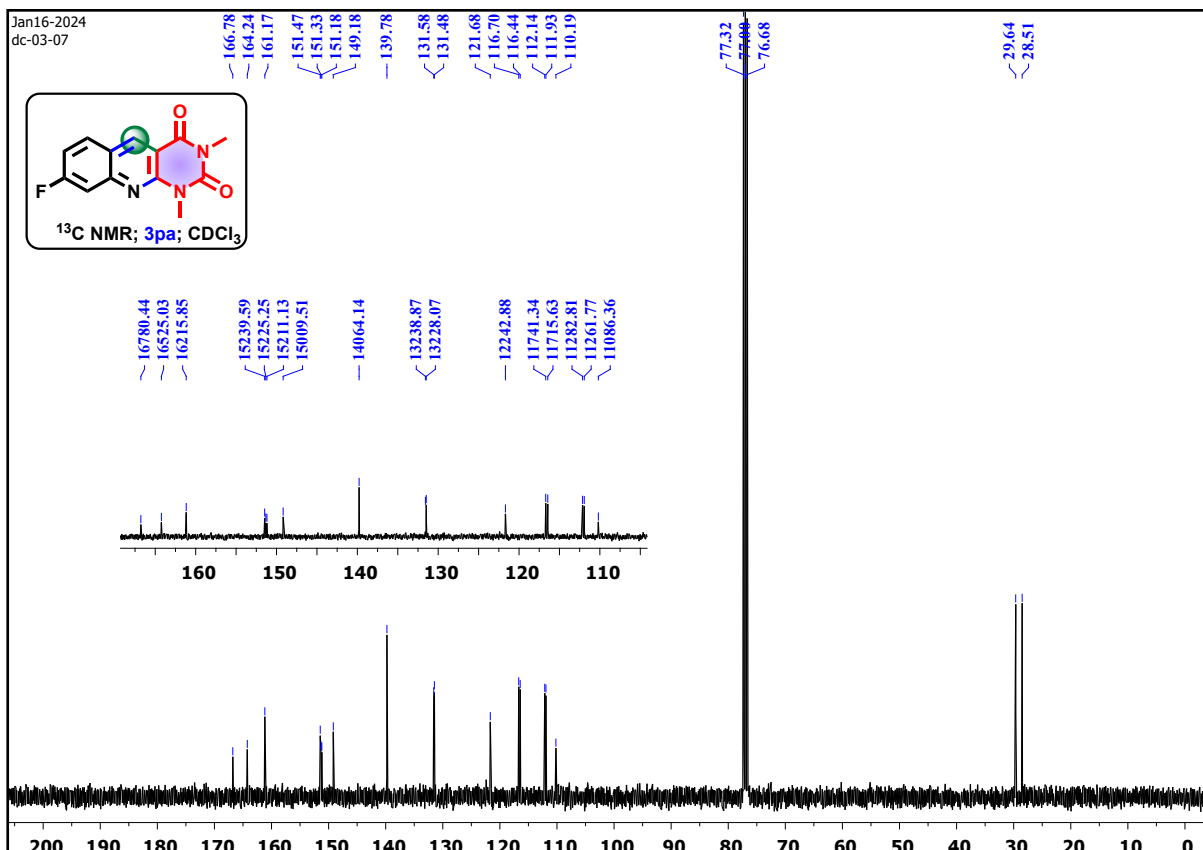

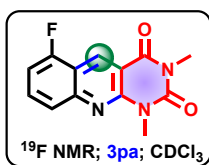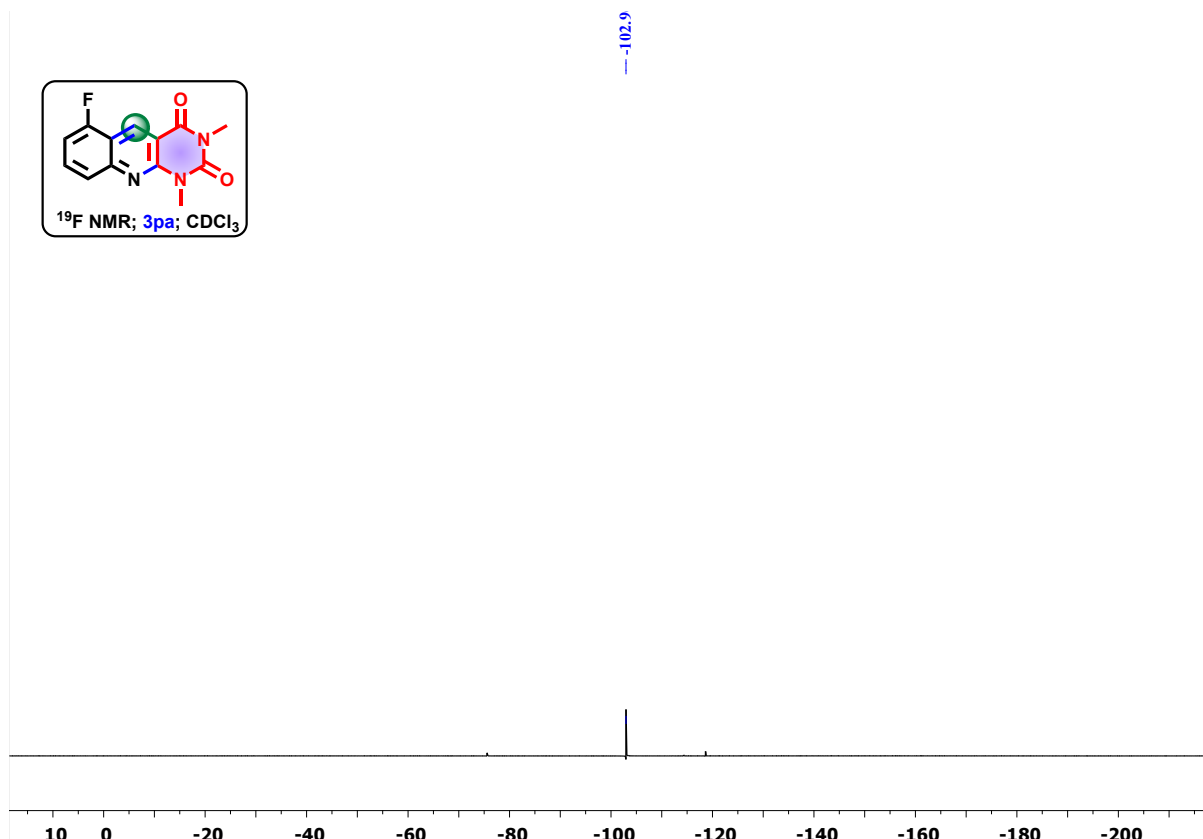

$^1\text{H}$  and  $^{13}\text{C}$  NMR of **3qa** in  $\text{CDCl}_3$

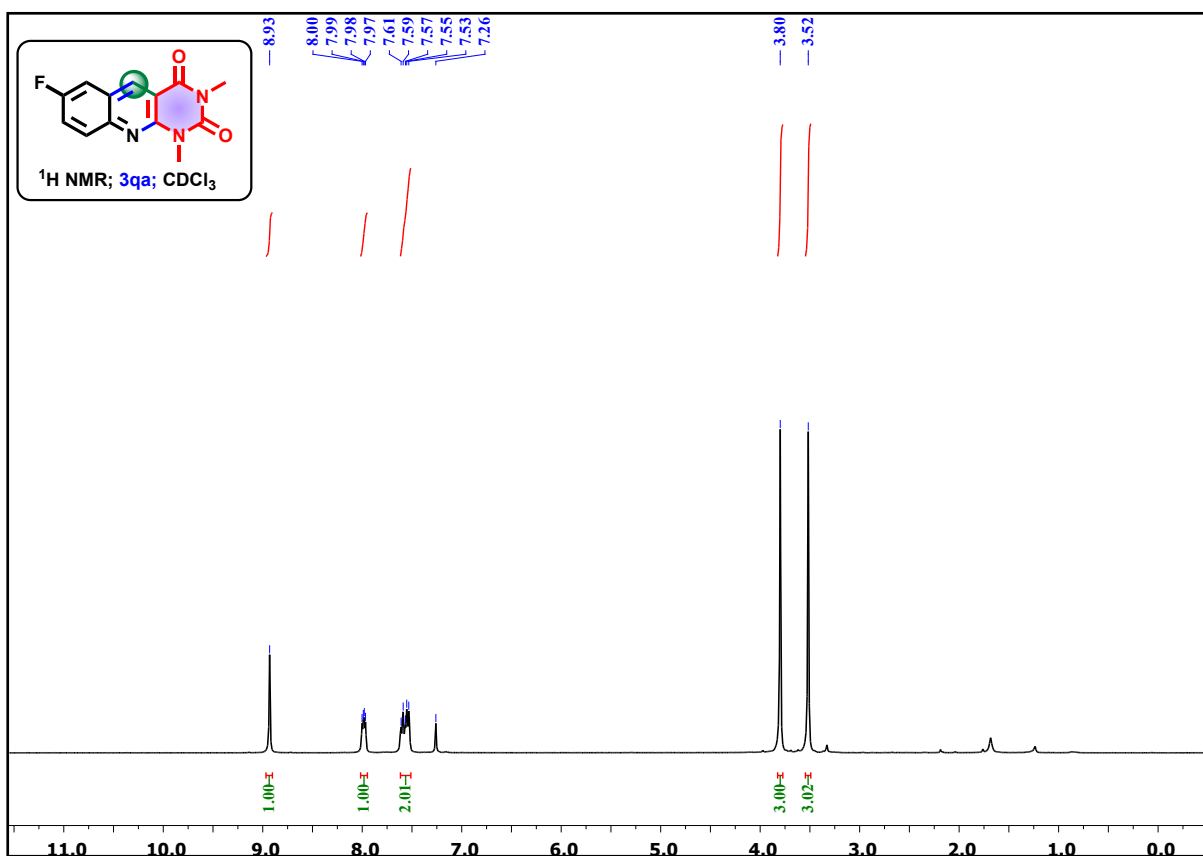

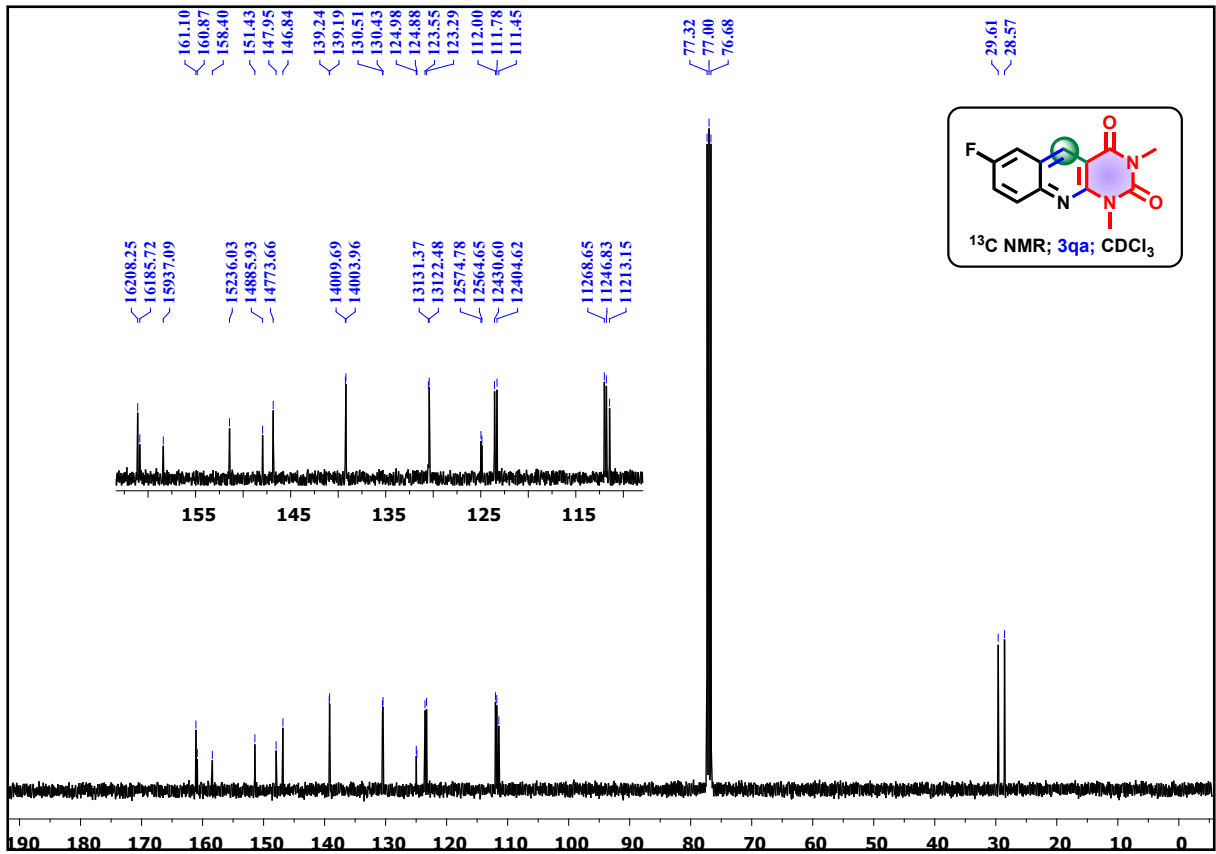

<sup>19</sup>F NMR of 3qa in CDCl<sub>3</sub>

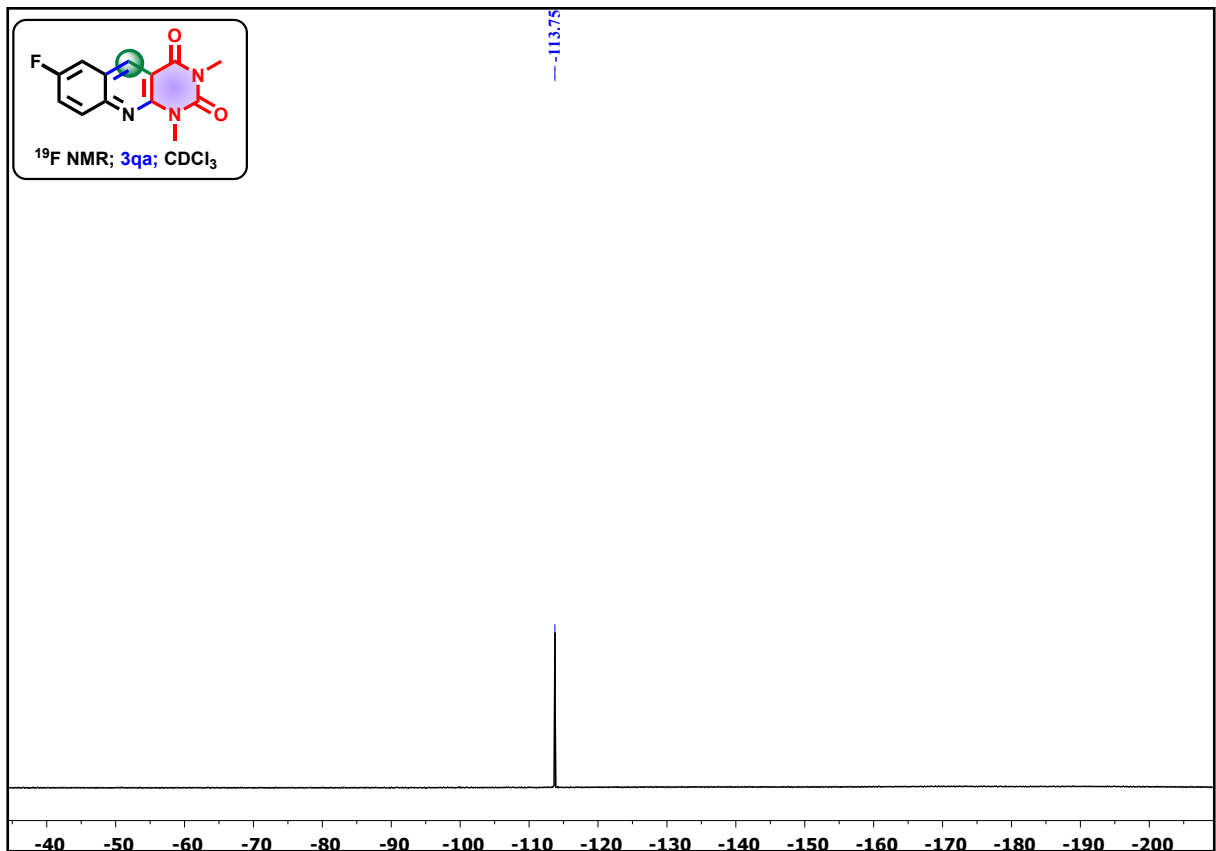

$^1\text{H}$  and  $^{13}\text{C}$  NMR of **3ra** in  $\text{CDCl}_3$

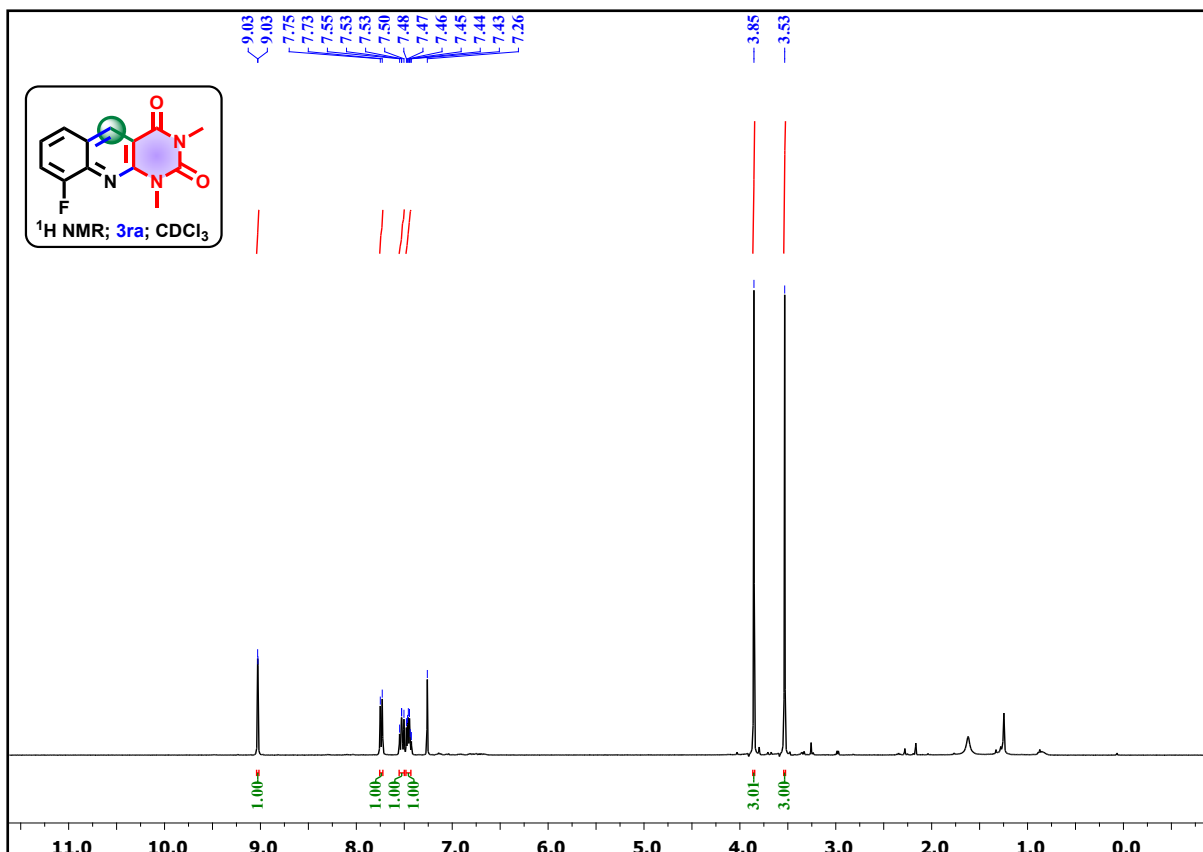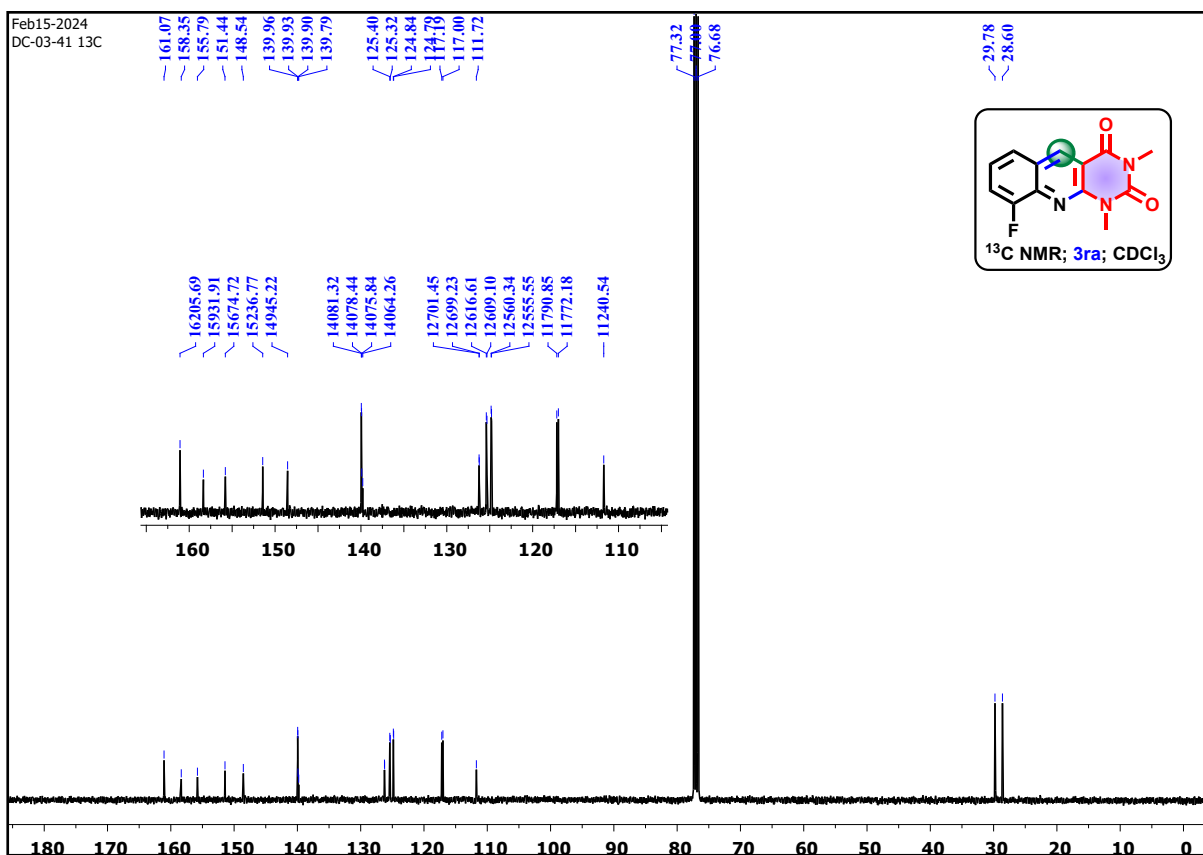

$^{19}\text{F}$  NMR of **3ra** in  $\text{CDCl}_3$

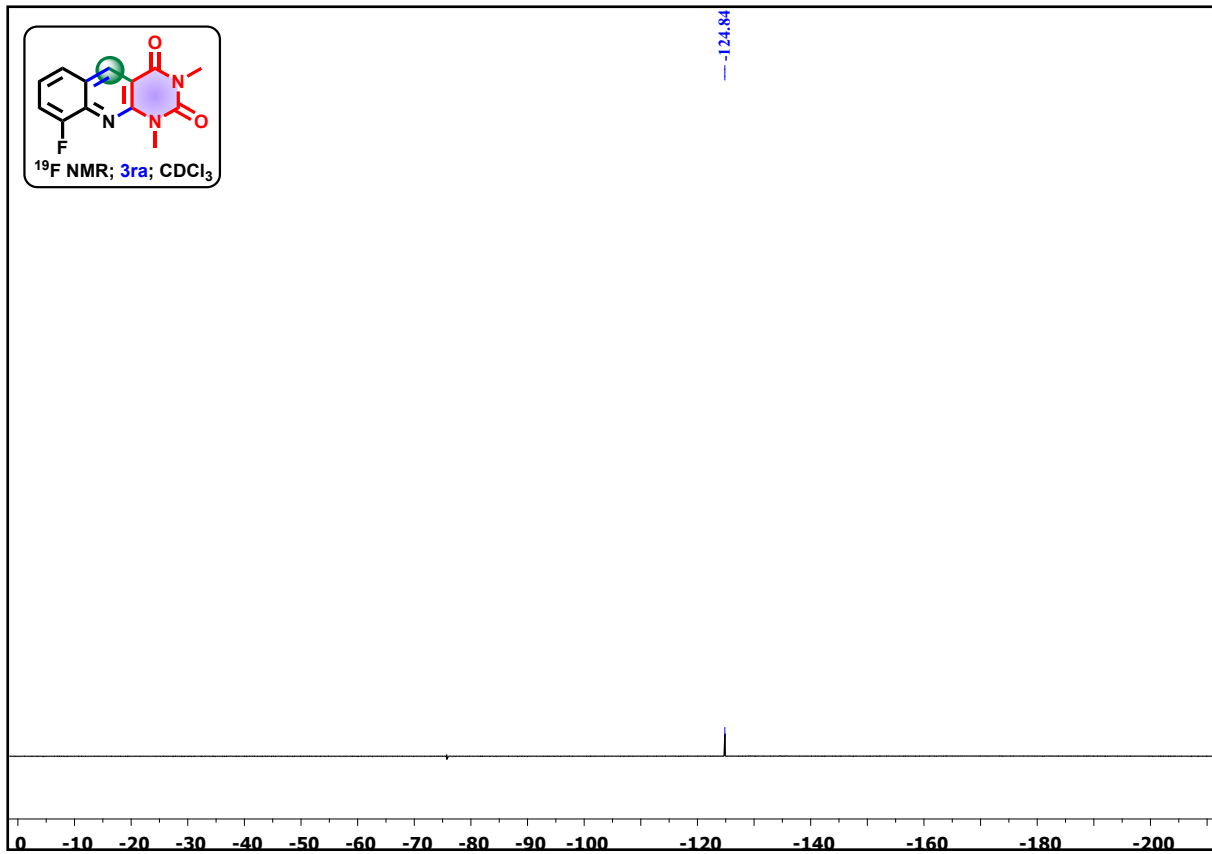

$^1\text{H}$ ,  $^{13}\text{C}$ , and  $^{19}\text{F}$  NMR of **3sa** in  $\text{CDCl}_3$

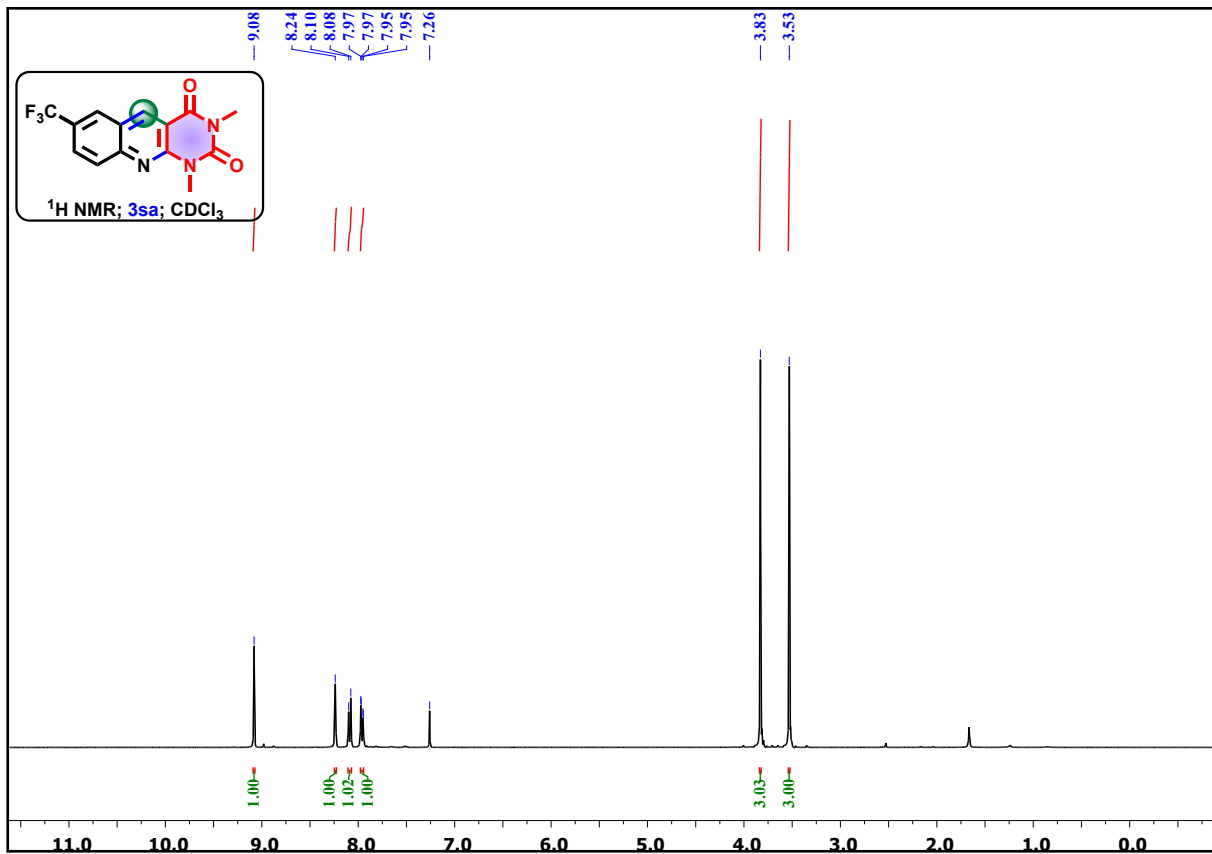



$^1\text{H}$  and  $^{13}\text{C}$  NMR of **3sa** in  $\text{CDCl}_3$

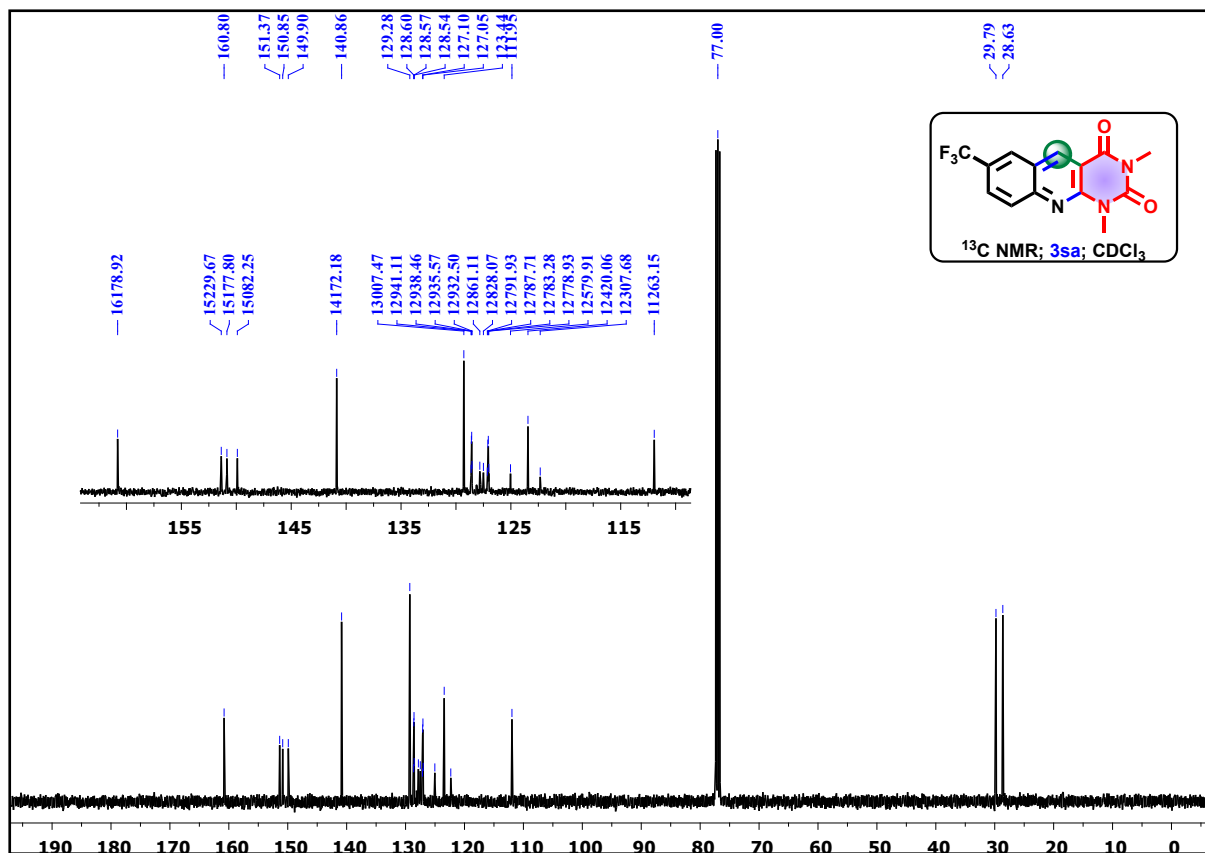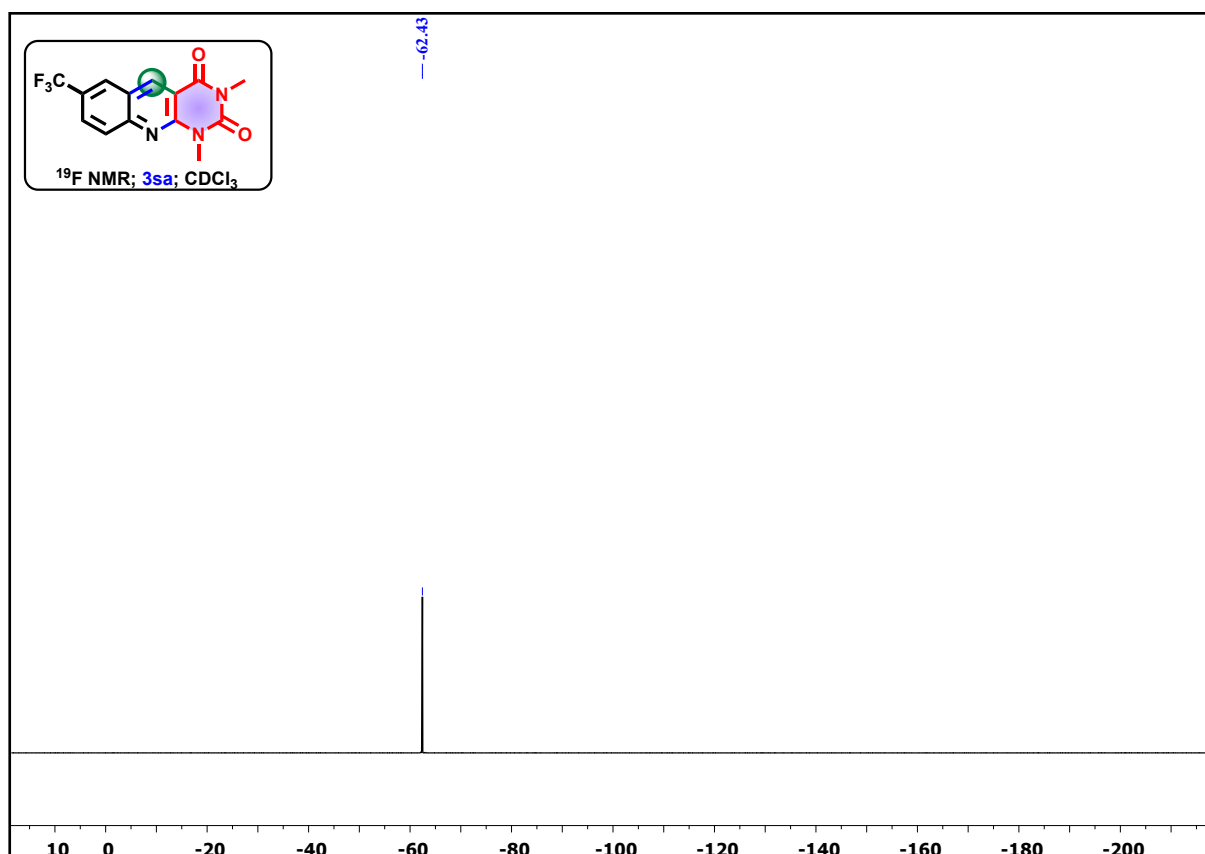

$^1\text{H}$  and  $^{13}\text{C}$  NMR of **3ta** in  $\text{CDCl}_3$

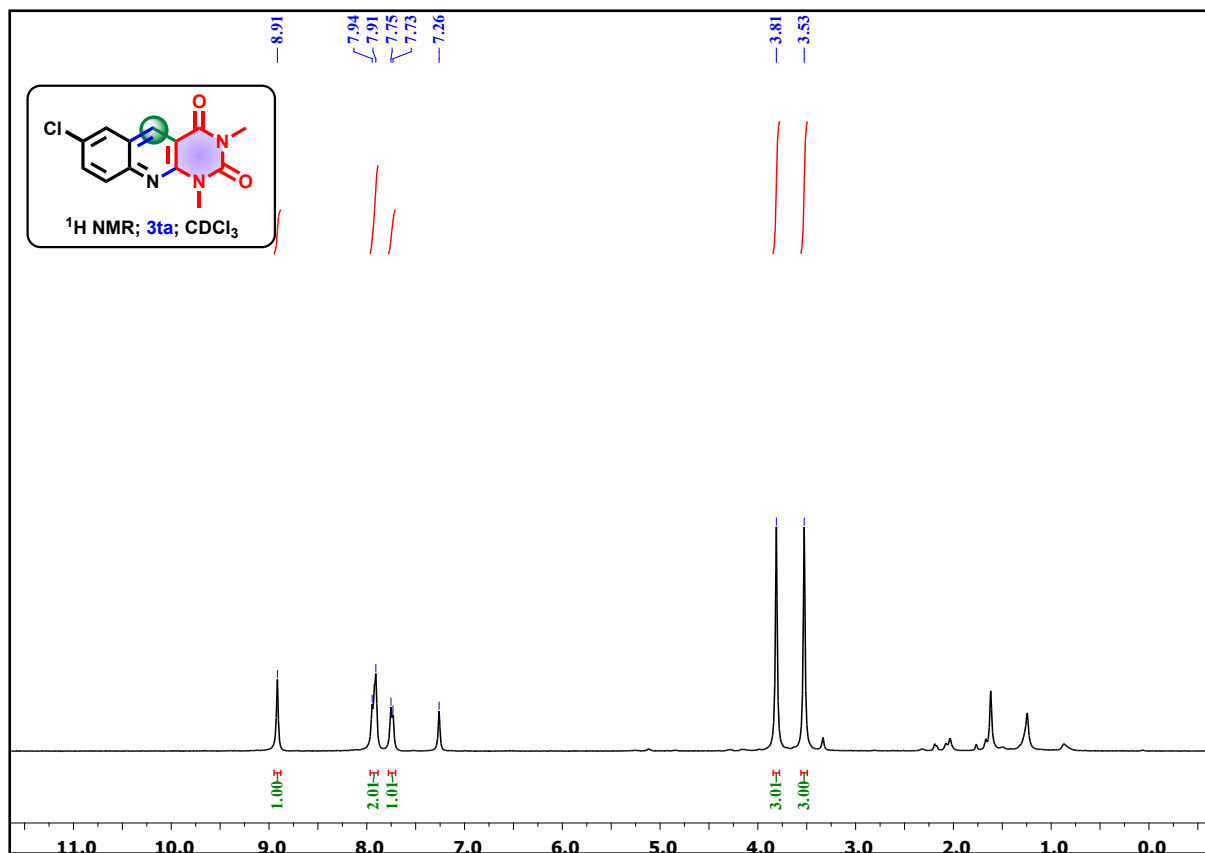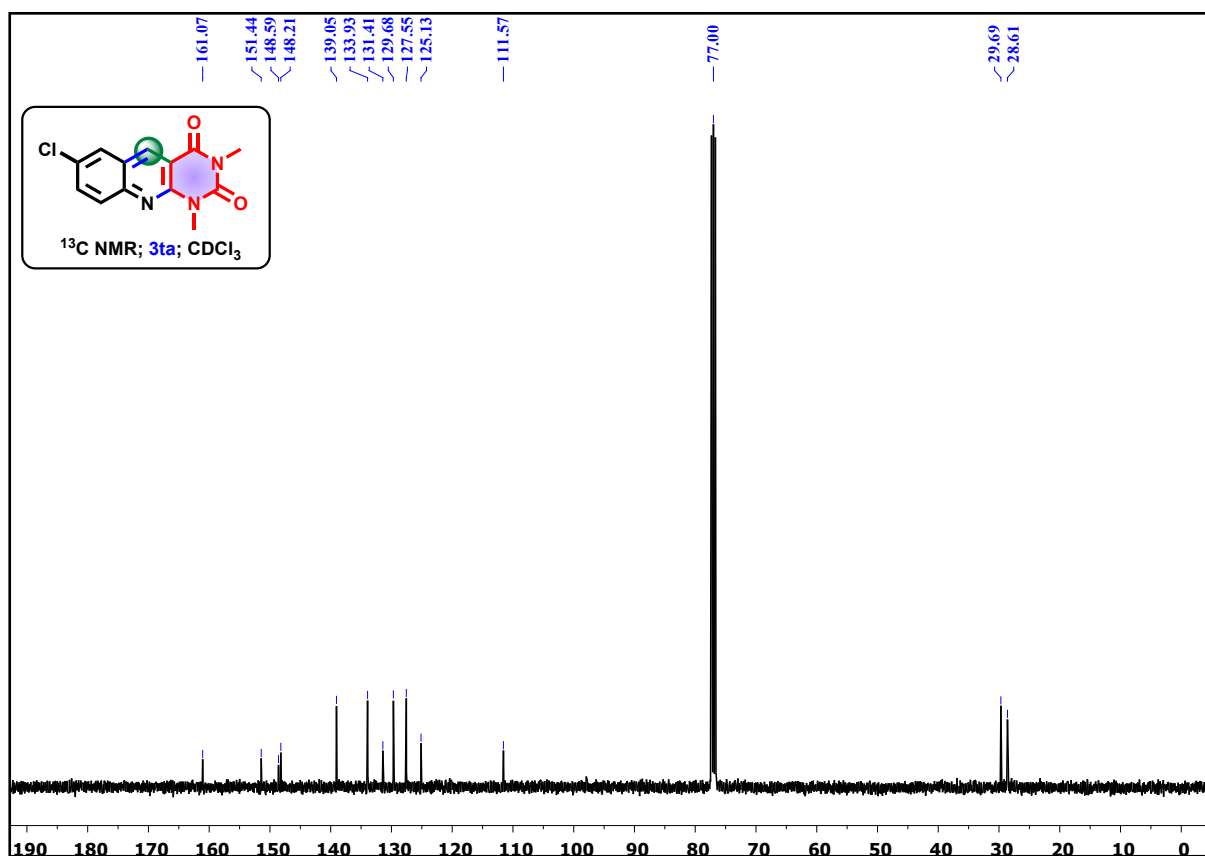

$^1\text{H}$  and  $^{13}\text{C}$  NMR of **3ua** in  $\text{CDCl}_3$

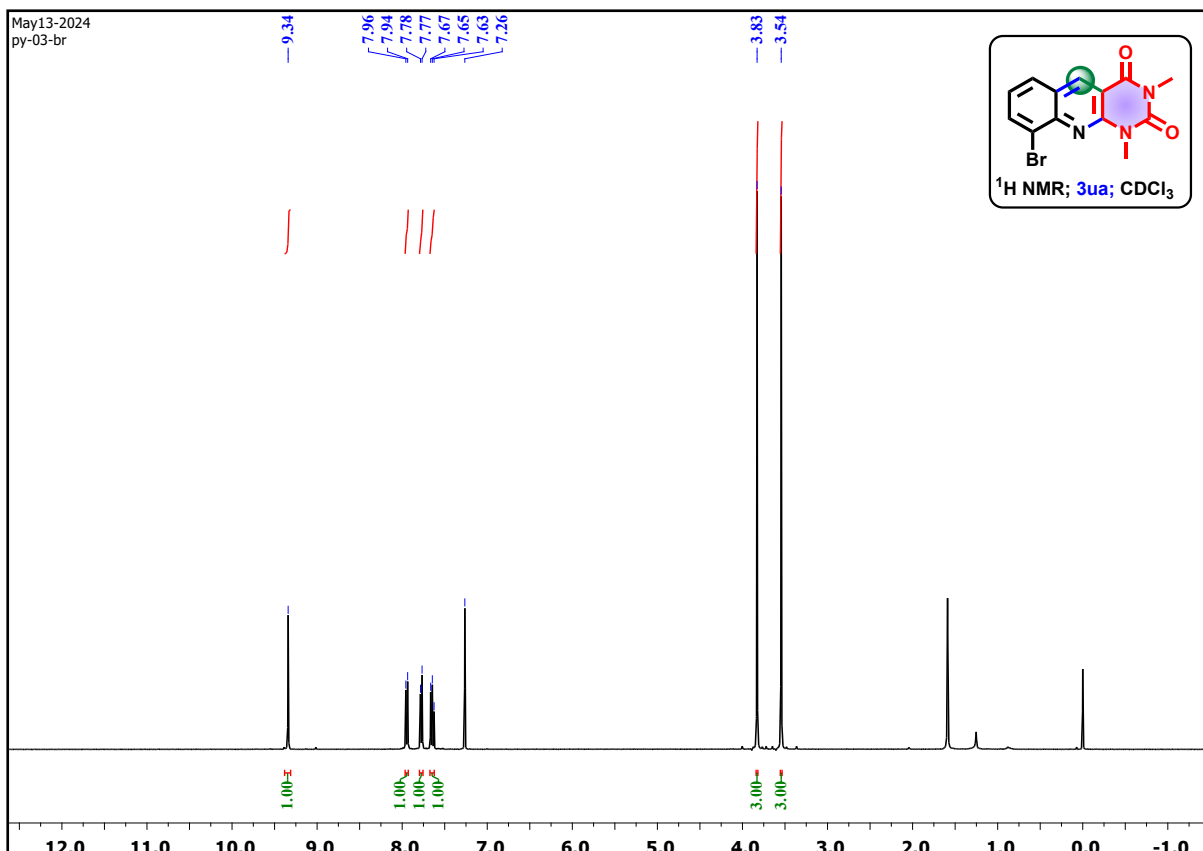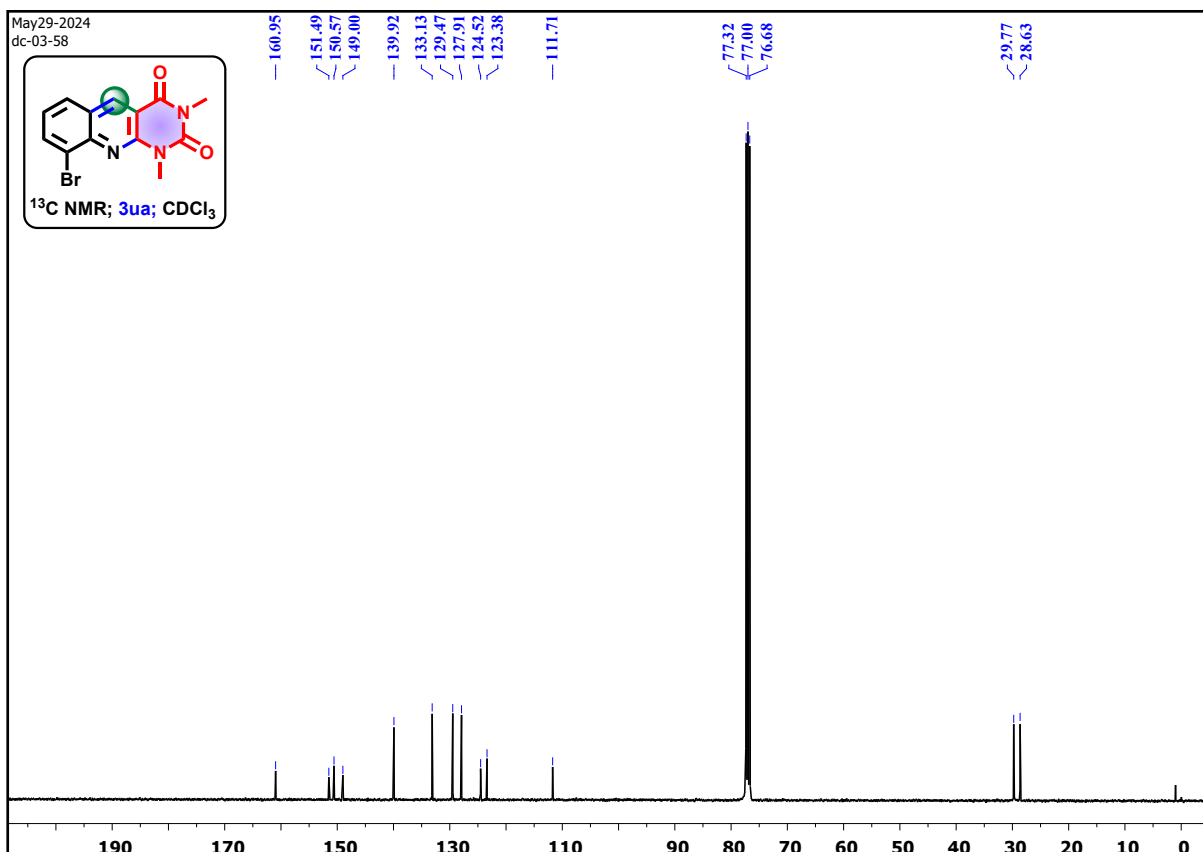

$^1\text{H}$  and  $^{13}\text{C}$  NMR of **3va** in  $\text{CDCl}_3$

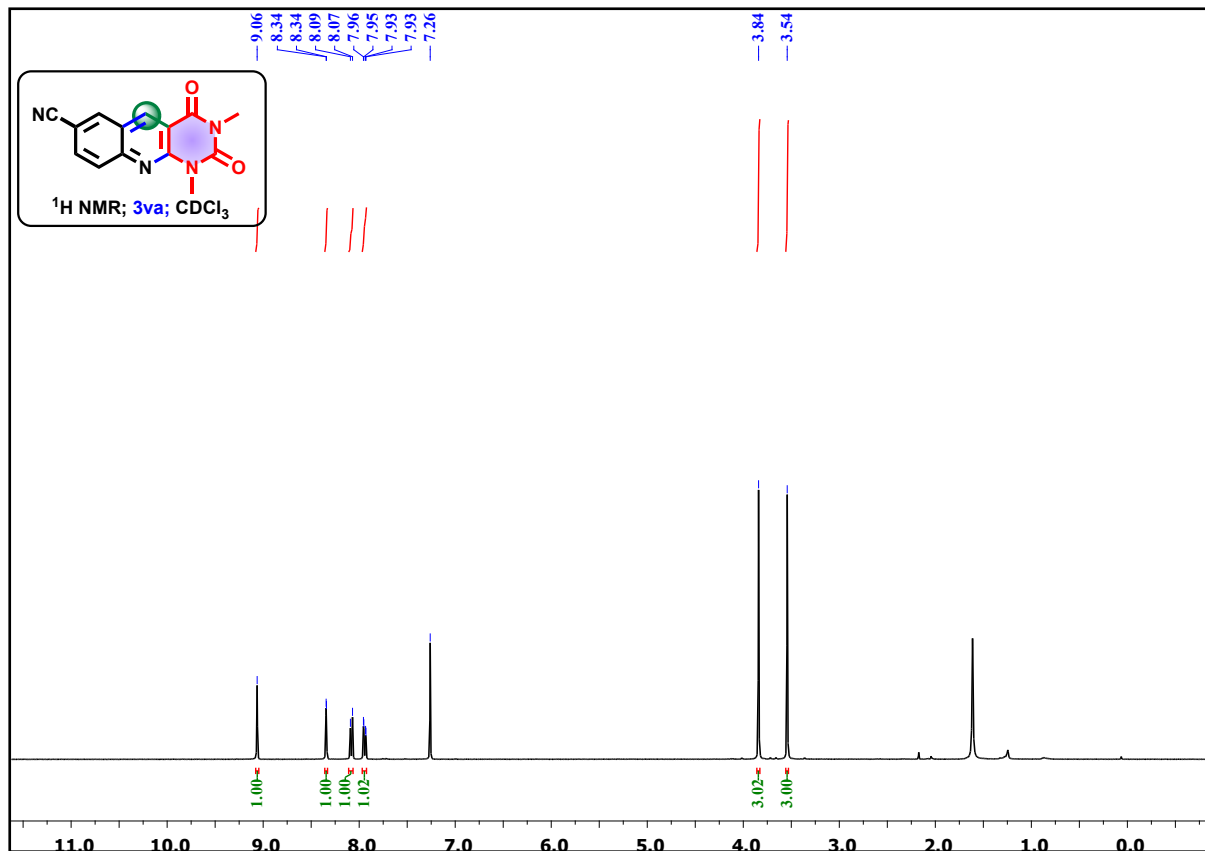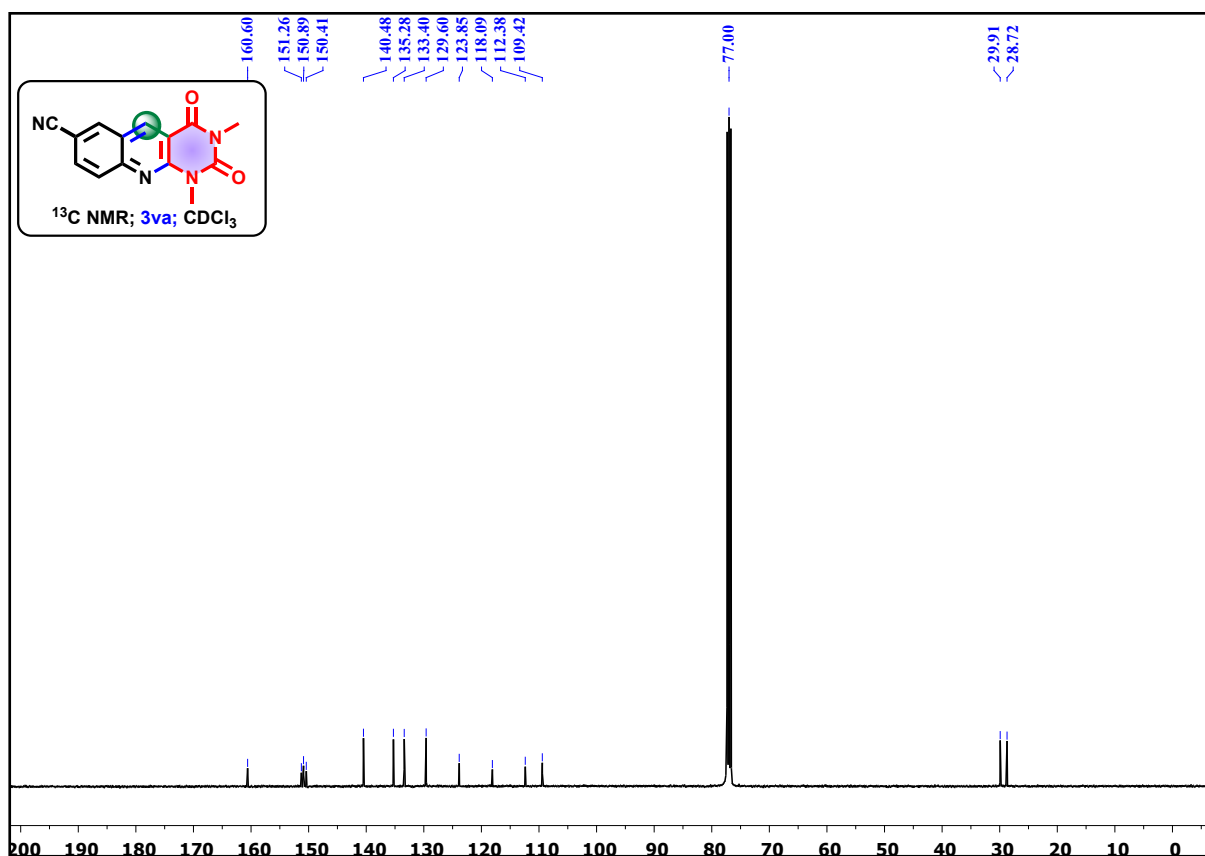

$^1\text{H}$  and  $^{13}\text{C}$  NMR of **3wa** in  $\text{CDCl}_3$

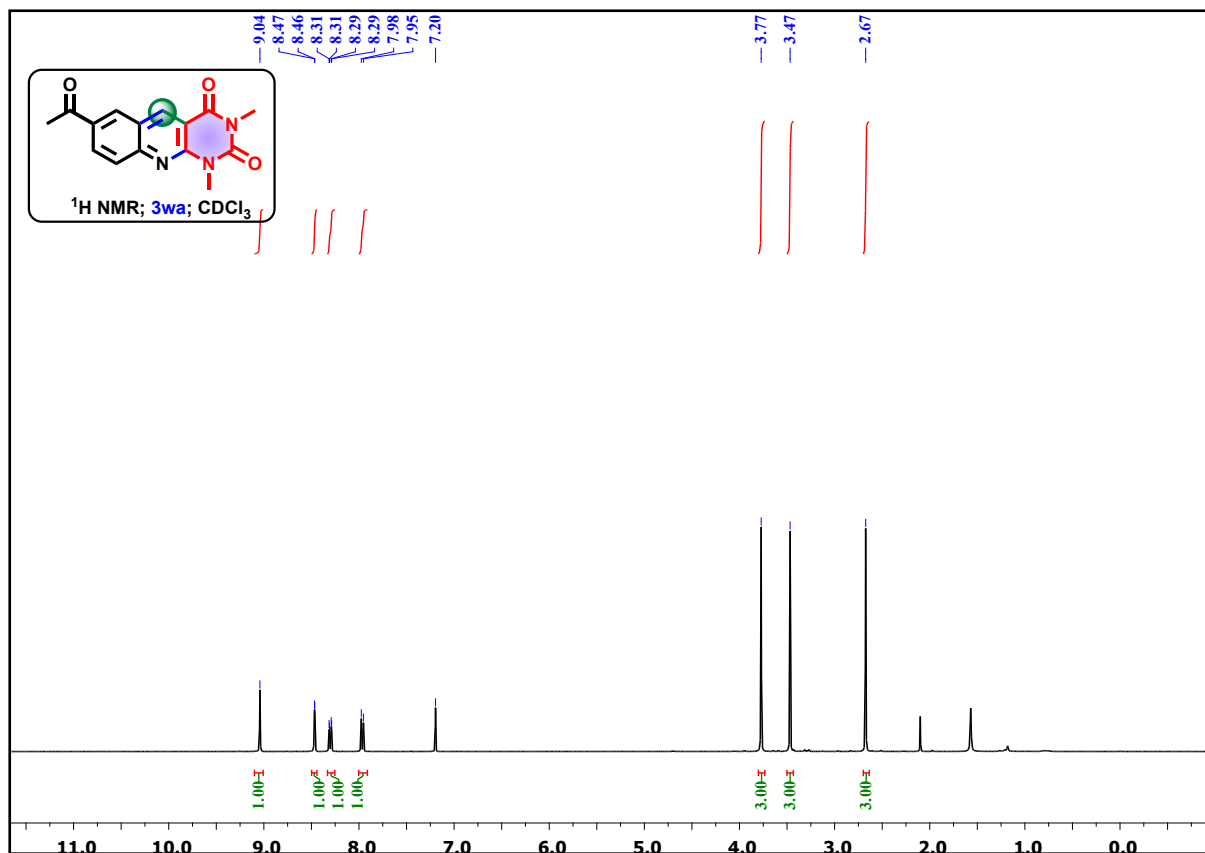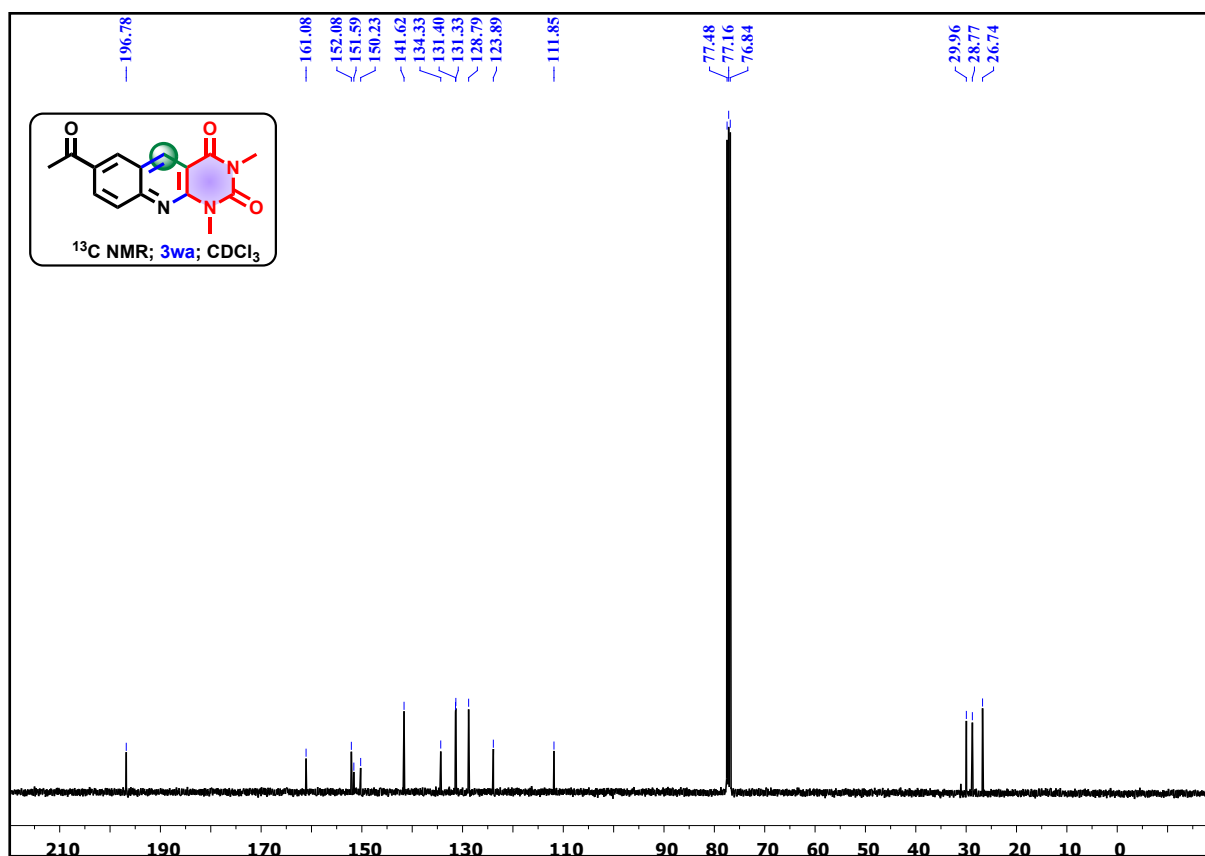

<sup>1</sup>H and <sup>13</sup>C NMR of **3ab** in CDCl<sub>3</sub>

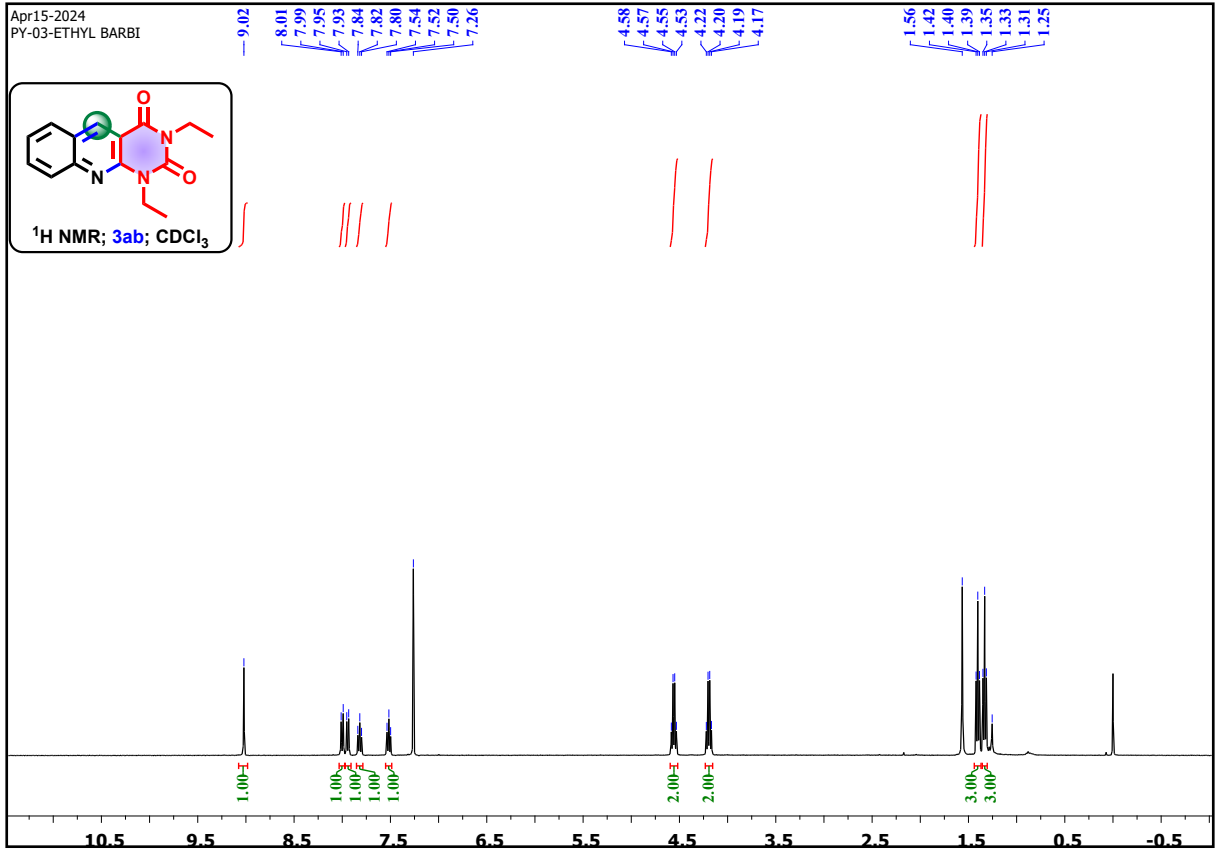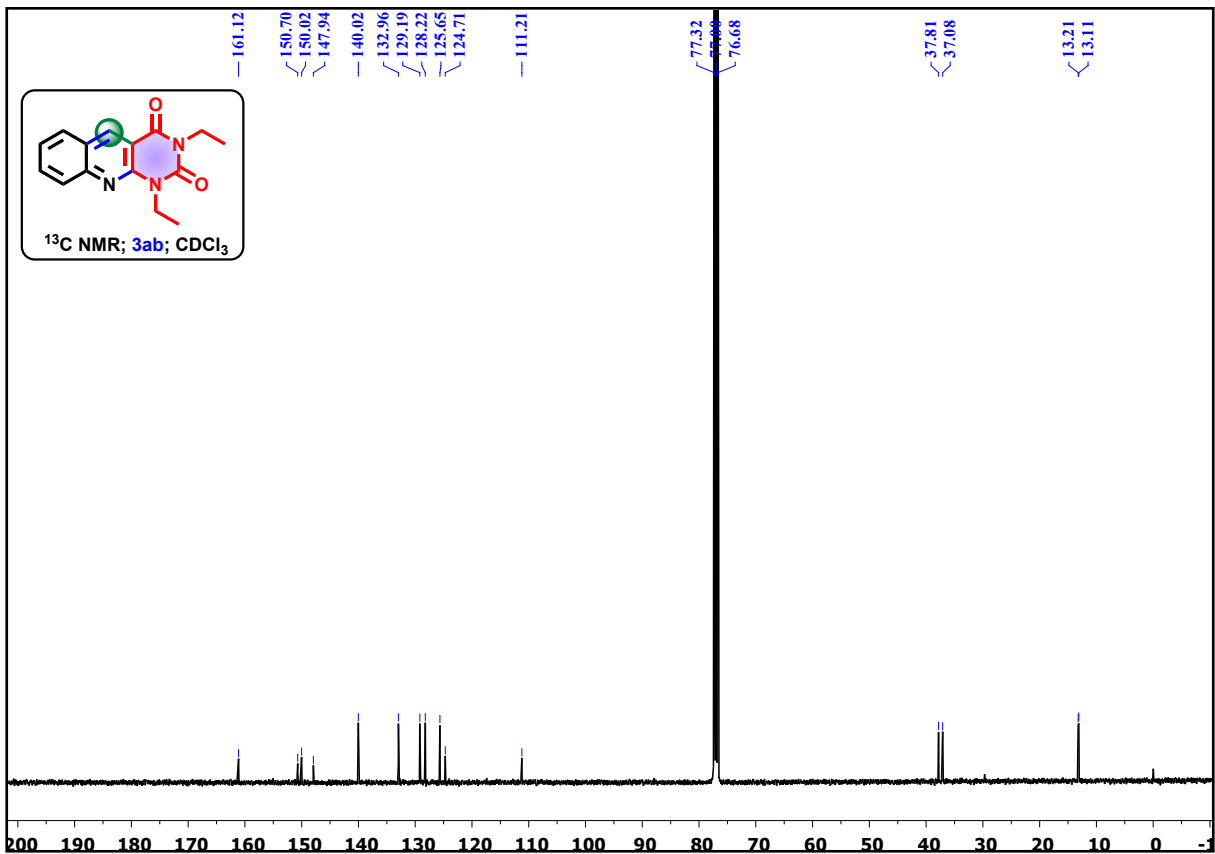

$^1\text{H}$  and  $^{13}\text{C}$  NMR of **3ac** in  $\text{CDCl}_3$

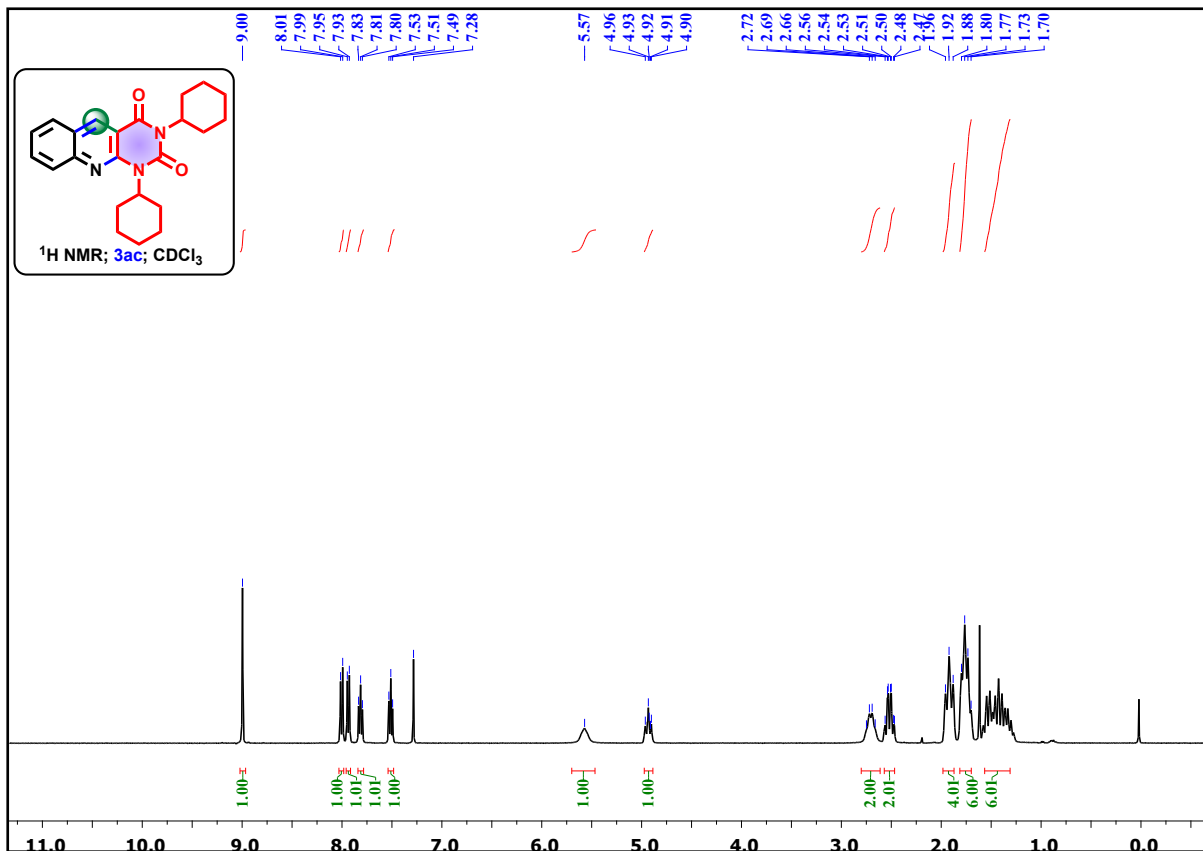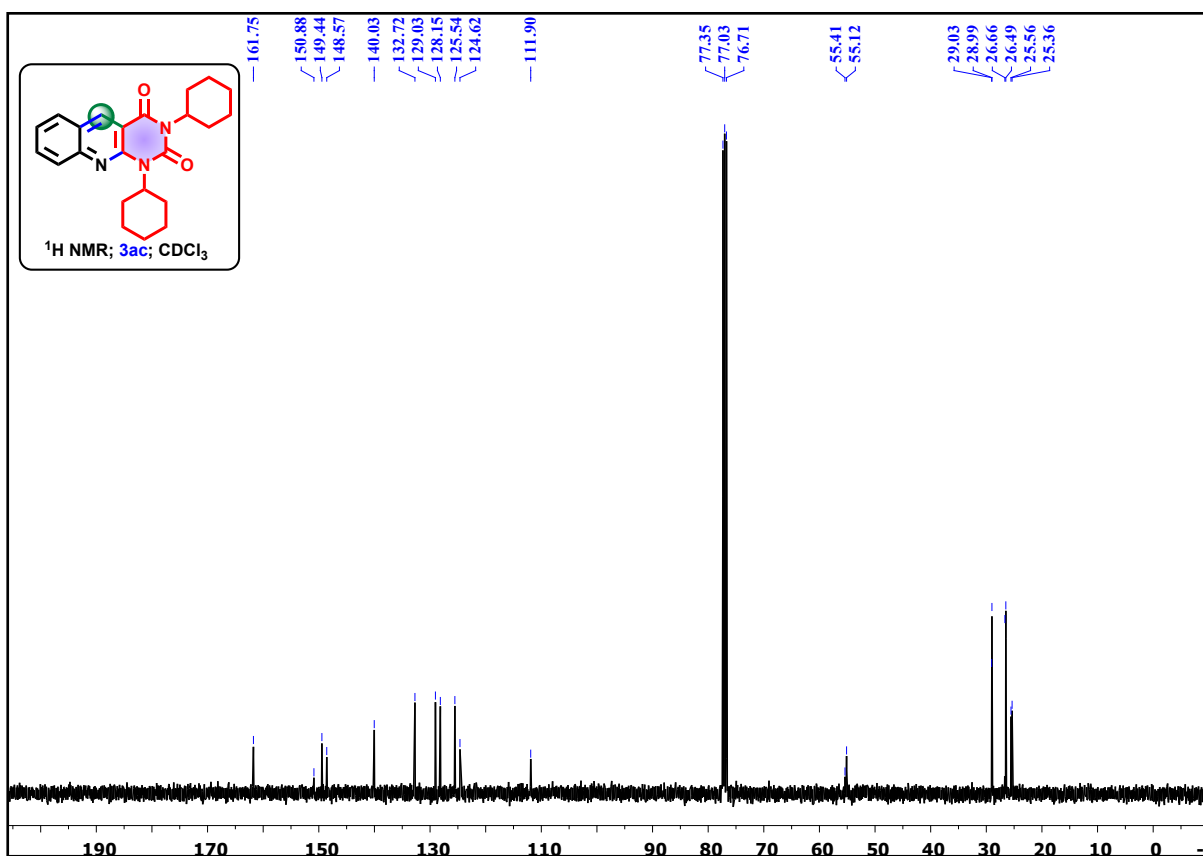

### $^1\text{H}$ and $^{13}\text{C}$ NMR of **3aa-d** in $\text{CDCl}_3$

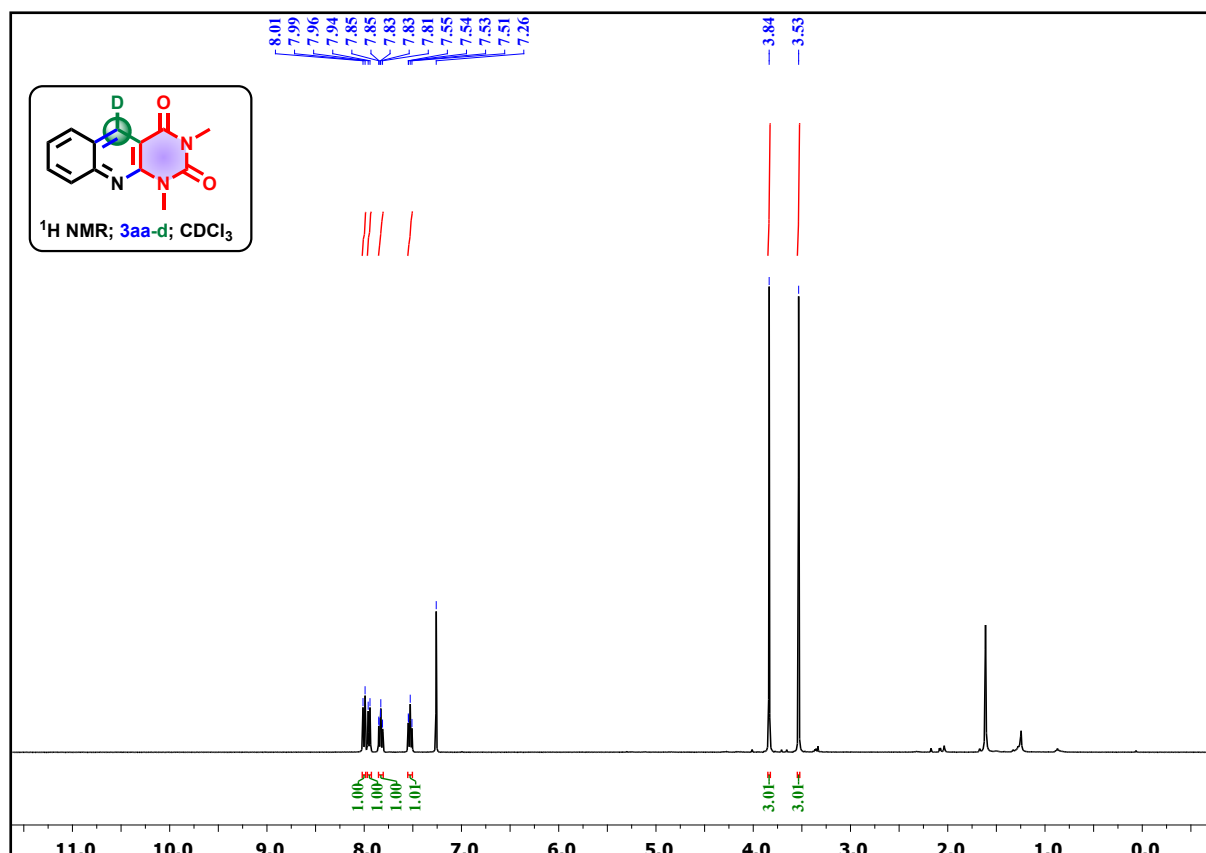

### Single crystal X-ray crystallography data of **3aa** (ccdc 2358964)

Compound **3aa** was dissolved in a solution of 10%  $\text{CHCl}_3$ /Hexane and 10 mL pear-shaped round bottom flask at room temperature. An appropriate single crystal was selected under a microscope and mounted with paratone oil on a Cryoloop. X-ray data was collected at 100K on Bruker APEX-II CCD Photon 100 diffractometer using monochromated Mo  $K\alpha$  radiation ( $\lambda = 0.71073 \text{ \AA}$ ). Integrations and scaling were performed using SAINT program<sup>1a</sup> and adsorption correction was done by applying the SADABS program.<sup>1b</sup> The crystal structure was solved by SHELXT 2018/2 (Sheldrick, 2018) and refined by full-matrix least square method using SHELXL-2018/3 (Sheldrick, 2018)<sup>1c</sup> and WinGX v2021.3<sup>1d</sup>. All the non-hydrogen atoms in the structure were refined anisotropically. The hydrogen atoms were fixed by HFIX in their ideal positions and refined using a riding model with isotropic thermal parameters. CCDC 2358964 contains supplementary Crystallographic data for the structure. This dataset can be obtained free of charge at [www.ccdc.cam.ac.uk/conts/retrieving.html](http://www.ccdc.cam.ac.uk/conts/retrieving.html) [or from the Cambridge



Crystallographic Data Centre (CCDC), 12 Union Road, Cambridge CB2 1EZ, UK; Fax: +44(0) 1223 336 033; Email: [deposit@ccdc.cam.ac.uk](mailto:deposit@ccdc.cam.ac.uk)

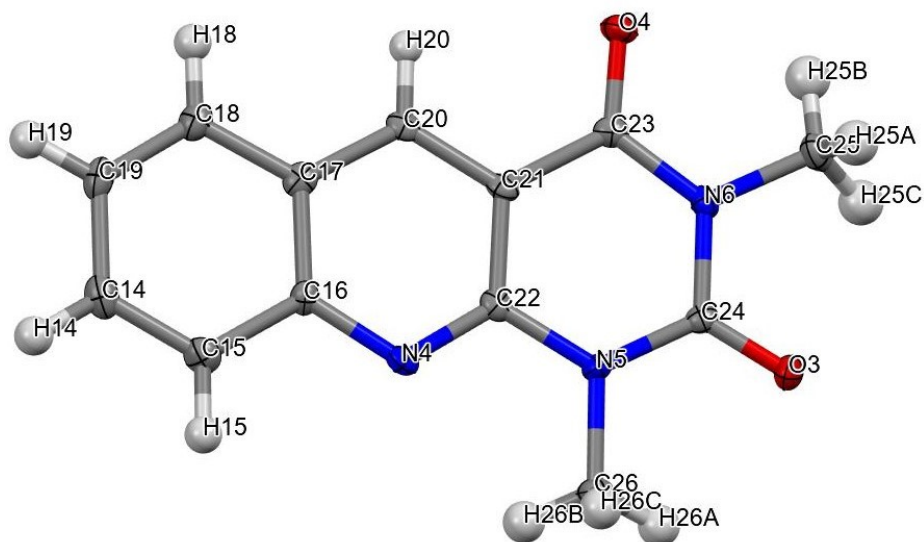

**Figure 1.** Image of single crystal X-Ray of molecule **3aa** with the 30% ellipsoid probability.

### Crystal data of **3aa**

|                                     |                                                            |                                          |
|-------------------------------------|------------------------------------------------------------|------------------------------------------|
| Mol. Formula = $C_{13}H_{11}N_3O_2$ | $Z = 4$                                                    | Reflections with $I > 2\sigma(I) = 2392$ |
| $M_r = 241.25$ g/mol                | $F(000) = 504$                                             | $(\Delta/\sigma)_{\max} \leq 0.001$      |
| Triclinic, $P$                      | $D_c = 1.472$ Mg m $^{-3}$                                 | $\Delta\rho_{\max} = 0.32$ e Å $^{-3}$   |
| $a = 8.252$ (2) Å                   | Mo $K\alpha$ radiation, $\lambda = 0.71073$ Å              | $\Delta\rho_{\min} = -0.32$ e Å $^{-3}$  |
| $b = 10.694$ (3) Å                  | $\theta_{\max} = 26.0^\circ$ , $\theta_{\min} = 2.4^\circ$ | $S = 1.06$                               |
| $c = 12.745$ (3) Å                  | $\mu = 0.10$ mm $^{-1}$                                    | Least-squares matrix: full               |
| $\alpha = 81.615$ (13) $^\circ$     | $T = 100$ K                                                | $R[F^2 > 2\sigma(F^2)] = 0.108$          |
| $\beta = 82.031$ (12) $^\circ$      | $\theta = 2.4-25.2^\circ$                                  | $wR(F^2) = 0.269$                        |
| $\gamma = 80.082$ (14) $^\circ$     | Measured reflections = 4193                                | $R_{\text{int}} = 0.1079$                |
| $V = 1088.5$ (5) Å $^3$             | Independent reflections = 4193                             |                                          |

$$w = 1/[\sigma^2(F_o^2) + (0.075P)^2 + 0.7036P] \text{ where } P = (F_o^2 + 2F_c^2)/3$$

$$F_c^* = kFc[1 + 0.001xFc^2\lambda^3/\sin(2\theta)]^{-1/4}$$

### Bond length (Å)

|        |           |         |           |
|--------|-----------|---------|-----------|
| O3—C24 | 1.211 (5) | C9—C8   | 1.426 (6) |
| O4—C23 | 1.231 (5) | C22—C21 | 1.418 (6) |
| O2—C11 | 1.230 (5) | C5—H5   | 0.9500    |
| O1—C10 | 1.205 (5) | C5—C4   | 1.420 (6) |
| N5—C24 | 1.371 (6) | C5—C6   | 1.354 (6) |

|         |           |          |           |
|---------|-----------|----------|-----------|
| N5—C22  | 1.397 (6) | C20—H20  | 0.9500    |
| N5—C26  | 1.474 (5) | C20—C21  | 1.362 (6) |
| N3—C11  | 1.384 (6) | C20—C17  | 1.410 (6) |
| N3—C10  | 1.406 (6) | C4—C7    | 1.408 (6) |
| N3—C12  | 1.464 (6) | C23—C21  | 1.465 (6) |
| N2—C9   | 1.390 (5) | C26—H26A | 0.9800    |
| N2—C10  | 1.368 (6) | C26—H26B | 0.9800    |
| N2—C13  | 1.471 (5) | C26—H26C | 0.9800    |
| N6—C24  | 1.401 (6) | C7—H7    | 0.9500    |
| N6—C23  | 1.381 (6) | C7—C8    | 1.361 (6) |
| N6—C25  | 1.466 (5) | C18—H18  | 0.9500    |
| N4—C16  | 1.370 (6) | C18—C17  | 1.415 (6) |
| N4—C22  | 1.318 (5) | C2—H2    | 0.9500    |
| N1—C3   | 1.366 (5) | C6—H6    | 0.9500    |
| N1—C9   | 1.316 (6) | C13—H13A | 0.9800    |
| C11—C8  | 1.464 (6) | C13—H13B | 0.9800    |
| C16—C17 | 1.418 (6) | C13—H13C | 0.9800    |
| C16—C15 | 1.419 (6) | C15—H15  | 0.9500    |
| C19—H19 | 0.9500    | C15—C14  | 1.374 (7) |
| C19—C18 | 1.359 (6) | C14—H14  | 0.9500    |
| C19—C14 | 1.414 (7) | C25—H25A | 0.9800    |
| C3—C4   | 1.419 (6) | C25—H25B | 0.9800    |
| C3—C2   | 1.414 (6) | C25—H25C | 0.9800    |
| C1—H1   | 0.9500    | C12—H12A | 0.9800    |
| C1—C2   | 1.363 (7) | C12—H12B | 0.9800    |
| C1—C6   | 1.407 (7) | C12—H12C | 0.9800    |

### Bond angle (°)

|            |           |               |           |
|------------|-----------|---------------|-----------|
| C24—N5—C22 | 123.3 (4) | N2—C10—N3     | 116.9 (4) |
| C24—N5—C26 | 116.5 (4) | N5—C26—H26A   | 109.5     |
| C22—N5—C26 | 120.1 (4) | N5—C26—H26B   | 109.5     |
| C11—N3—C10 | 125.3 (4) | N5—C26—H26C   | 109.5     |
| C11—N3—C12 | 118.8 (4) | H26A—C26—H26B | 109.5     |
| C10—N3—C12 | 115.8 (4) | H26A—C26—H26C | 109.5     |
| C9—N2—C13  | 119.5 (4) | H26B—C26—H26C | 109.5     |
| C10—N2—C9  | 123.6 (4) | C4—C7—H7      | 120.3     |
| C10—N2—C13 | 116.7 (4) | C8—C7—C4      | 119.5 (4) |
| C24—N6—C25 | 116.7 (4) | C8—C7—H7      | 120.3     |
| C23—N6—C24 | 124.7 (4) | C22—C21—C23   | 120.6 (4) |
| C23—N6—C25 | 118.6 (4) | C20—C21—C22   | 118.3 (4) |
| C22—N4—C16 | 116.5 (4) | C20—C21—C23   | 121.0 (4) |
| C9—N1—C3   | 117.6 (4) | C19—C18—H18   | 120.0     |
| O3—C24—N5  | 122.7 (4) | C19—C18—C17   | 120.1 (5) |
| O3—C24—N6  | 119.9 (4) | C17—C18—H18   | 120.0     |
| N5—C24—N6  | 117.4 (4) | C3—C2—H2      | 119.7     |
| O2—C11—N3  | 121.4 (4) | C1—C2—C3      | 120.6 (5) |
| O2—C11—C8  | 123.2 (4) | C1—C2—H2      | 119.7     |

|                |            |                |            |
|----------------|------------|----------------|------------|
| N3—C11—C8      | 115.5 (4)  | C1—C6—H6       | 120.1      |
| N4—C16—C17     | 124.0 (4)  | C5—C6—C1       | 119.9 (4)  |
| N4—C16—C15     | 117.6 (4)  | C5—C6—H6       | 120.1      |
| C17—C16—C15    | 118.4 (4)  | N2—C13—H13A    | 109.5      |
| C18—C19—H19    | 119.9      | N2—C13—H13B    | 109.5      |
| C18—C19—C14    | 120.3 (5)  | N2—C13—H13C    | 109.5      |
| C14—C19—H19    | 119.9      | H13A—C13—H13B  | 109.5      |
| N1—C3—C4       | 122.9 (4)  | H13A—C13—H13C  | 109.5      |
| N1—C3—C2       | 118.8 (4)  | H13B—C13—H13C  | 109.5      |
| C2—C3—C4       | 118.4 (4)  | C20—C17—C16    | 116.2 (4)  |
| C2—C1—H1       | 119.5      | C20—C17—C18    | 123.5 (5)  |
| C2—C1—C6       | 121.1 (5)  | C18—C17—C16    | 120.2 (4)  |
| C6—C1—H1       | 119.5      | C9—C8—C11      | 120.1 (4)  |
| N2—C9—C8       | 118.5 (4)  | C7—C8—C11      | 120.8 (4)  |
| N1—C9—N2       | 118.0 (4)  | C7—C8—C9       | 119.0 (4)  |
| N1—C9—C8       | 123.5 (4)  | C16—C15—H15    | 120.0      |
| N5—C22—C21     | 118.0 (4)  | C14—C15—C16    | 120.0 (5)  |
| N4—C22—N5      | 117.6 (4)  | C14—C15—H15    | 120.0      |
| N4—C22—C21     | 124.4 (4)  | C19—C14—H14    | 119.5      |
| C4—C5—H5       | 119.6      | C15—C14—C19    | 121.0 (5)  |
| C6—C5—H5       | 119.6      | C15—C14—H14    | 119.5      |
| C6—C5—C4       | 120.8 (4)  | N6—C25—H25A    | 109.5      |
| C21—C20—H20    | 119.7      | N6—C25—H25B    | 109.5      |
| C21—C20—C17    | 120.5 (4)  | N6—C25—H25C    | 109.5      |
| C17—C20—H20    | 119.7      | H25A—C25—H25B  | 109.5      |
| C3—C4—C5       | 119.3 (4)  | H25A—C25—H25C  | 109.5      |
| C7—C4—C3       | 117.6 (4)  | H25B—C25—H25C  | 109.5      |
| C7—C4—C5       | 123.1 (4)  | N3—C12—H12A    | 109.5      |
| O4—C23—N6      | 122.0 (4)  | N3—C12—H12B    | 109.5      |
| O4—C23—C21     | 122.3 (4)  | N3—C12—H12C    | 109.5      |
| N6—C23—C21     | 115.8 (4)  | H12A—C12—H12B  | 109.5      |
| O1—C10—N3      | 119.9 (4)  | H12A—C12—H12C  | 109.5      |
| O1—C10—N2      | 123.2 (4)  | H12B—C12—H12C  | 109.5      |
| O4—C23—C21—C22 | -179.7 (4) | C22—N4—C16—C15 | -179.6 (4) |
| O4—C23—C21—C20 | -1.0 (6)   | C5—C4—C7—C8    | -179.6 (4) |
| O2—C11—C8—C9   | -179.2 (4) | C4—C3—C2—C1    | 0.3 (6)    |
| O2—C11—C8—C7   | -1.9 (7)   | C4—C5—C6—C1    | 0.0 (7)    |
| N5—C22—C21—C20 | 179.0 (4)  | C4—C7—C8—C11   | -178.5 (4) |
| N5—C22—C21—C23 | -2.3 (6)   | C4—C7—C8—C9    | -1.2 (6)   |
| N3—C11—C8—C9   | 0.0 (6)    | C23—N6—C24—O3  | -176.6 (4) |
| N3—C11—C8—C7   | 177.2 (4)  | C23—N6—C24—N5  | 3.5 (6)    |
| N2—C9—C8—C11   | -2.2 (6)   | C10—N3—C11—O2  | -179.3 (4) |
| N2—C9—C8—C7    | -179.5 (4) | C10—N3—C11—C8  | 1.6 (6)    |
| N6—C23—C21—C22 | 0.2 (6)    | C10—N2—C9—N1   | -178.3 (4) |
| N6—C23—C21—C20 | 178.9 (4)  | C10—N2—C9—C8   | 3.2 (6)    |
| N4—C16—C17—C20 | 0.1 (6)    | C26—N5—C24—O3  | -2.8 (6)   |
| N4—C16—C17—C18 | 180.0 (4)  | C26—N5—C24—N6  | 177.0 (4)  |
| N4—C16—C15—C14 | 179.9 (4)  | C26—N5—C22—N4  | 2.4 (6)    |

|                 |            |                 |            |
|-----------------|------------|-----------------|------------|
| N4—C22—C21—C20  | -1.1 (6)   | C26—N5—C22—C21  | -177.7 (4) |
| N4—C22—C21—C23  | 177.7 (4)  | C21—C20—C17—C16 | -0.1 (6)   |
| N1—C3—C4—C5     | -179.6 (4) | C21—C20—C17—C18 | -180.0 (4) |
| N1—C3—C4—C7     | 1.1 (6)    | C18—C19—C14—C15 | 0.1 (7)    |
| N1—C3—C2—C1     | 179.8 (4)  | C2—C3—C4—C5     | 0.0 (6)    |
| N1—C9—C8—C11    | 179.4 (4)  | C2—C3—C4—C7     | -179.4 (4) |
| N1—C9—C8—C7     | 2.1 (6)    | C2—C1—C6—C5     | 0.2 (7)    |
| C24—N5—C22—N4   | -174.7 (4) | C6—C1—C2—C3     | -0.3 (7)   |
| C24—N5—C22—C21  | 5.3 (6)    | C6—C5—C4—C3     | -0.1 (6)   |
| C24—N6—C23—O4   | 179.1 (4)  | C6—C5—C4—C7     | 179.2 (4)  |
| C24—N6—C23—C21  | -0.8 (6)   | C13—N2—C9—N1    | -3.8 (6)   |
| C11—N3—C10—O1   | 179.1 (4)  | C13—N2—C9—C8    | 177.7 (4)  |
| C11—N3—C10—N2   | -0.7 (6)   | C13—N2—C10—O1   | 3.7 (6)    |
| C16—N4—C22—N5   | -179.0 (3) | C13—N2—C10—N3   | -176.4 (3) |
| C16—N4—C22—C21  | 1.1 (6)    | C17—C16—C15—C14 | 0.8 (6)    |
| C16—C15—C14—C19 | -0.4 (7)   | C17—C20—C21—C22 | 0.5 (6)    |
| C19—C18—C17—C16 | 0.8 (6)    | C17—C20—C21—C23 | -178.3 (4) |
| C19—C18—C17—C20 | -179.4 (4) | C15—C16—C17—C20 | 179.2 (4)  |
| C3—N1—C9—N2     | -179.8 (3) | C15—C16—C17—C18 | -1.0 (6)   |
| C3—N1—C9—C8     | -1.3 (6)   | C14—C19—C18—C17 | -0.3 (7)   |
| C3—C4—C7—C8     | -0.3 (6)   | C25—N6—C24—O3   | 1.9 (6)    |
| C9—N2—C10—O1    | 178.4 (4)  | C25—N6—C24—N5   | -178.0 (4) |
| C9—N2—C10—N3    | -1.8 (6)   | C25—N6—C23—O4   | 0.6 (6)    |
| C9—N1—C3—C4     | -0.3 (6)   | C25—N6—C23—C21  | -179.3 (4) |
| C9—N1—C3—C2     | -179.8 (4) | C12—N3—C11—O2   | 2.9 (6)    |
| C22—N5—C24—O3   | 174.4 (4)  | C12—N3—C11—C8   | -176.3 (4) |
| C22—N5—C24—N6   | -5.8 (6)   | C12—N3—C10—O1   | -3.0 (6)   |
| C22—N4—C16—C17  | -0.6 (6)   | C12—N3—C10—N2   | 177.2 (4)  |

## Reference:

1. (a) SMART & SAINT. Software Reference manuals. Versions 6.28a & 5.625, Bruker Analytical X-ray System Inc., Madison, Wisconsin, USA, 2001. (b) Sheldrick, G. M. Siemens Area Detector Absorption Correction Program, University of Göttingen, Göttingen, Germany, 1994. (c) Sheldrick, G. M. *Acta Cryst.* **2015**, *C71*, 3-8. (d) Farrugia, L. J. WinGX-A Windows Program for Crystal Structure Analysis, *J. Appl. Cryst.* **1999**, *32*, 83.
